# Supplementary material for: Synthesis of acridones via Ir(iii)-catalyzed amination annulation of oxazoles with anthranils
Source: Royal Society of Chemistry journal article supplement (doi:10.1039/d4ob00377b), 2024-01-01

## Supporting Information

### Synthesis of Acridones via Ir(III)-Catalyzed Amination Annulation of Oxazoles with Anthranils

Han-Yi Zhou, Lin Dong\*

*Key Laboratory of Drug-Targeting and Drug Delivery System of the Education Ministry and Sichuan Province, Sichuan Engineering Laboratory for Plant-Sourced Drug and Sichuan Research Center for Drug Precision Industrial Technology, West China School of Pharmacy, Sichuan University, Chengdu 610041, China*  
Email: dongl@scu.edu.cn

#### Table of Contents

|                                                                             |            |
|-----------------------------------------------------------------------------|------------|
| <b>1. General Methods</b> .....                                             | <b>S1</b>  |
| <b>2. General Procedure for the Synthesis of Substrates</b> .....           | <b>S1</b>  |
| <b>3. General Procedure for the Synthesis of Acridone Derivatives</b> ..... | <b>S2</b>  |
| <b>4. Optimization of Reaction Conditions</b> .....                         | <b>S2</b>  |
| <b>5. The Scope of Substrates</b> .....                                     | <b>S5</b>  |
| <b>6. Mechanistic Studies</b> .....                                         | <b>S5</b>  |
| <b>7. References</b> .....                                                  | <b>S10</b> |
| <b>8. Characterization Data and NMR Spectra of All Compounds</b> .....      | <b>S11</b> |

## 1. General Methods

All solvents were dried before use following the standard procedures. Unless otherwise indicated, all starting materials purchased from commercial suppliers were used without further purification. NMR data were obtained for  $^1\text{H}$  at 400 MHz,  $^{19}\text{F}$  NMR at 376 MHz, and for  $^{13}\text{C}$  at 100 or 151 MHz. Chemical shifts were reported in ppm from tetramethylsilane with the solvent resonance as the internal standard in  $\text{CDCl}_3$  solution. NMR data are reported as follows: chemical shifts, multiplicity (s: singlet, d: doublet, dd: doublet of doublets, t: triplet, q: quartet, sep: septet, m: multiplet, br: broad signal), coupling constant (Hz), and integration. ESI HRMS was recorded on a Waters SYNAPT G2 and Water XEVO G2 Q-ToF. TLC was performed on glass-backed silica plates. UV detection was monitored at 254 nm. Column chromatography was performed on silica gel (300-400 mesh), eluting with ethyl acetate and petroleum ether. 3-phenyl-quinazolones and  $\alpha,\alpha$ -difluoromethylene alkynes were obtained according to the literature procedures.<sup>1-2</sup>

## 2. General Procedure for the Synthesis of Substrates

### 2.1 General procedure for the synthesis of 2-aryloxazoline (1a)

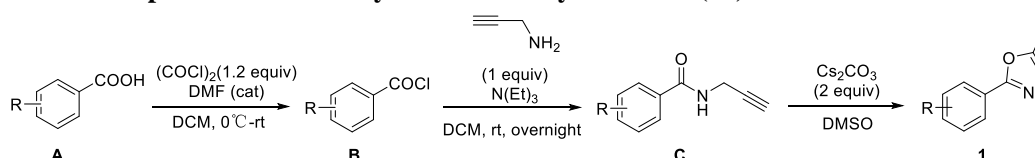

A 100 mL oven-dried round bottom flask with a stir bar was purged with argon and charged with benzoic acid **A** (5 mmol) in anhydrous  $\text{CH}_2\text{Cl}_2$  (15 mL), which was added DMF (3 drop) at  $0^\circ\text{C}$  and  $(\text{COCl})_2$  (1.2 equiv) was subsequently added dropwise by syringe. After 15 min, the reaction mixture was allowed to warm to room temperature overnight. After removal of the volatiles under vacuum, the crude product **B** was used directly without any further purification.<sup>3</sup>

To a solution of the propargylic amine (5.0 mmol) in anhydrous  $\text{CH}_2\text{Cl}_2$  (15 mL) at  $0^\circ\text{C}$ ,  $\text{Et}_3\text{N}$  (1.5 equiv) and DMAP (2 mol%) were added, and the acid chloride (1.0 equiv) was added dropwise at  $0^\circ\text{C}$ . After 15 min, the mixture was stirred overnight at room temperature overnight. After the reaction was completed, the mixture was quenched with water and extracted with  $\text{CH}_2\text{Cl}_2$  ( $3 \times 20$  mL), the combined organic layer was washed with brine and then the combined organic layers were dried ( $\text{MgSO}_4$ ), filtered and concentrated in vacuo. Purification of the residue by column chromatography (petroleum ether/ethyl acetate = 3/1, v/v) afforded the product **C**.<sup>4</sup>

A mixture of propargylamides **C**,  $\text{Cs}_2\text{CO}_3$  (2 equiv),  $\text{DMSO}$  (10 mL), was heated at  $100^\circ\text{C}$  for 2 h and cooled to room temperature. The mixture was quenched with water and extracted with  $\text{EtOAc}$  ( $3 \times 20$  mL), the combined organic layer was washed with brine and then the combined organic layers were dried ( $\text{MgSO}_4$ ), filtered, and concentrated in vacuo. Purification of the residue by column chromatography (petroleum ether/ethyl acetate = 10/1, v/v) afforded the product **1**.<sup>5</sup>

### 2.2 General procedure for the synthesis of substituted anthranils (2a)

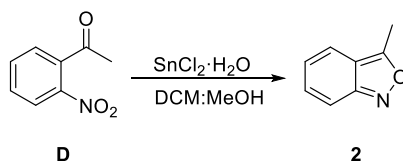

A round bottom flask equipped with a magnetic stirrer bar was charged with the substituted 2-nitroacylbenzene (3.00 mmol) **D** in  $\text{EtOAc}-\text{MeOH}$  (1:1; 20 mL).  $\text{SnCl}_2 \cdot \text{H}_2\text{O}$  (9.00 mmol) was

added and the reaction was stirred at room temperature for 24 h. The reaction was quenched by saturated  $\text{NaHCO}_3$  (20 ml), and filtered. The aqueous phase was extracted with EtOAc ( $3 \times 10$  mL) and the organic portions combined, washed with  $\text{H}_2\text{O}$  (20 mL), saturated aqueous NaCl (20 mL), dried over  $\text{Na}_2\text{SO}_4$ , filtered and reduced in vacuo. The residue was purified by column chromatography ( $\text{SiO}_2$ , hexanes/EtOAc) to provide the title compound **2**.<sup>6</sup>

### 3. General Procedure for the Synthesis of Acridone Derivatives

#### General procedure for the synthesis of **3ba**

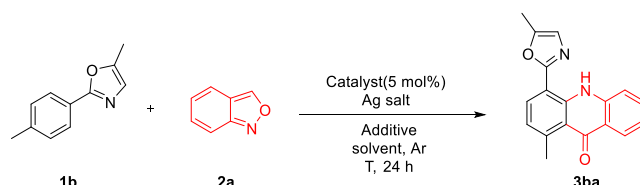

5-methyl-2-phenyl-oxazole **1b** (17.3 mg, 0.1 mmol), anthranil **2a** (23.8 mg, 0.2 mmol),  $\text{AgNTf}_2$  (0.2 equiv.),  $\text{AgOTf}$  (0.1 equiv.), 1-AdCOOH (5.0 equiv.), and  $[\text{Cp}^*\text{IrCl}_2]_2$  (5 mol %), were stirred in  $\text{PhNO}_2$ : DCE = 4:1 (1.0 mL) under inert Ar atmosphere in preheated oil bath at 120 °C for 24 h. The reaction was then quenched with saturated  $\text{NaHCO}_3$  solution (10 mL). The reaction was stirred for a while and extracted with EtOAc ( $3 \times 10$  mL), washed with brine and dried over anhydrous  $\text{Na}_2\text{SO}_4$ . The filtrate was concentrated and the residue was purified by flash chromatography (eluent: petroleum ether /EtOAc = 10:1, v/v) to give the product **3ba** as yellow solid (26.4 mg, 91%).

#### General procedure for the synthesis of **4aa**

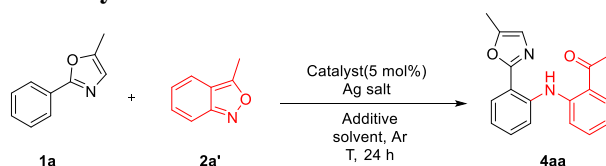

5-methyl-2-phenyl-oxazole **1a** (15.9 mg, 0.1 mmol), anthranil **2a'** (26.6 mg, 0.2 mmol),  $\text{AgNTf}_2$  (0.2 equiv.),  $\text{AgOTf}$  (0.1 equiv.), 1-AdCOOH (5.0 equiv.), and  $[\text{Cp}^*\text{IrCl}_2]_2$  (5 mol %), were stirred in  $\text{PhNO}_2$ : DCE = 4:1 (1.0 mL) under inert Ar atmosphere in preheated oil bath at 120 °C for 24 h. The reaction was then quenched with saturated  $\text{NaHCO}_3$  solution (10 mL). The reaction was stirred for a while and extracted with EtOAc ( $3 \times 10$  mL), washed with brine and dried over anhydrous  $\text{Na}_2\text{SO}_4$ . The filtrate was concentrated and the residue was purified by flash chromatography (eluent: petroleum ether /EtOAc = 10:1, v/v) to give the product **4aa** as yellow solid (17.5 mg, 60%).

### 4. Optimization of reaction conditions

Table S1. The effect of Lewis acid<sup>[a]</sup>

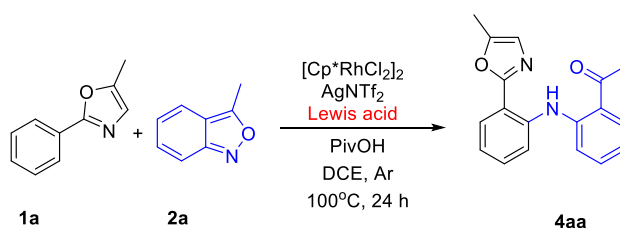

| Entry | Lewis acid           | Yield (%) <sup>[b]</sup> |
|-------|----------------------|--------------------------|
| 1     | AgOTf                | <10%                     |
| 2     | Zn(OTf) <sub>2</sub> | Trace                    |
| 3     | Cu(OTf) <sub>2</sub> | ND                       |
| 4     | Sc(OTf) <sub>3</sub> | NR                       |
| 5     | La(OTf) <sub>3</sub> | Trace                    |

[a] Unless otherwise stated, reaction conditions are as follows: **1a** (0.05 mmol), **2a** (1.2 equiv), [Cp\*IrCl<sub>2</sub>]<sub>2</sub> (5 mol%), AgNTf<sub>2</sub> (0.2 equiv.), **Lewis acid** (0.1 equiv.), PivOH (1.0 equiv.), DCE (0.5 mL), under Ar, 100 °C, 24 h. [b] Isolated yields.

**Table S2. The effect of acid<sup>[a]</sup>**

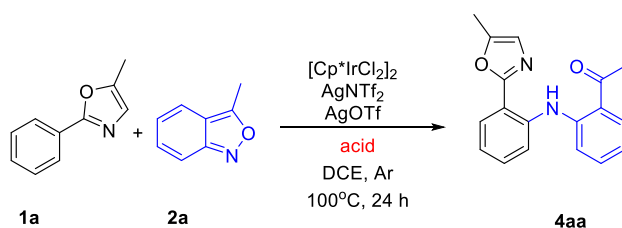

| Entry | Acid                   | Yield (%) <sup>[b]</sup> |
|-------|------------------------|--------------------------|
| 1     | 1-AdCOOH               | 36%                      |
| 2     | AcOH                   | 23%                      |
| 3     | PhCOOH                 | 26%                      |
| 4     | TFA                    | NR                       |
| 5     | L-Serine               | 26%                      |
| 6     | 2-Aminoisobutyric Acid | 24%                      |

[a] Unless otherwise stated, reaction conditions are as follows: **1a** (0.05 mmol), **2a** (2.0 equiv), [Cp\*IrCl<sub>2</sub>]<sub>2</sub> (5 mol%), AgNTf<sub>2</sub> (0.2 equiv.), AgOTf (0.1 equiv.), **acid** (1.0 equiv.), DCE (0.5 mL), under Ar, 120 °C, 24 h. [b] Isolated yields.

**Table S3. The effect of base<sup>[a]</sup>**

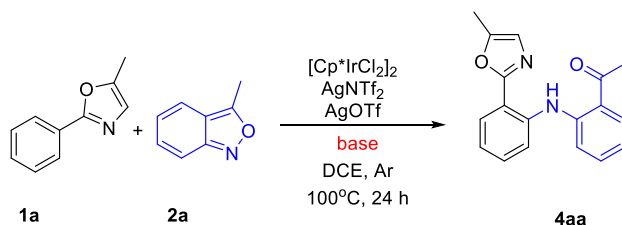

| Entry | Base                    | Yield (%) <sup>[b]</sup> |
|-------|-------------------------|--------------------------|
| 1     | PivONa·H <sub>2</sub> O | 27%                      |

|   |                                         |     |
|---|-----------------------------------------|-----|
| 2 | NaOAc                                   | 14% |
| 3 | Mn(OAc) <sub>2</sub> ·2H <sub>2</sub> O | 11% |
| 4 | K <sub>2</sub> CO <sub>3</sub>          | NR  |
| 5 | PhCOONa                                 | 14% |

[a] Unless otherwise stated, reaction conditions are as follows: **1a** (0.05 mmol), **2a** (2.0 equiv), [Cp\*IrCl<sub>2</sub>]<sub>2</sub> (5 mol%), AgNTf<sub>2</sub> (0.2 equiv.), AgOTf (0.1 equiv.), **base** (2.5 equiv.), DCE (0.5 mL), under Ar, 120 °C, 24 h. [b] Isolated yields.

**Table S4. The effect of silver salt<sup>[a]</sup>**

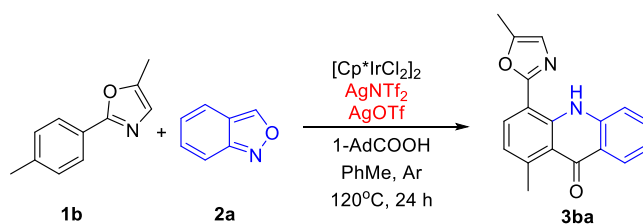

| Entry | Silver salt                                  | Yield (%) <sup>[b]</sup> |
|-------|----------------------------------------------|--------------------------|
| 1     | AgNTf <sub>2</sub> 0.2eq/AgOTf 0.1eq         | 40%                      |
| 2     | AgNTf <sub>2</sub> <b>0.5eq</b> /AgOTf 0.1eq | 32%                      |
| 3     | AgNTf <sub>2</sub> <b>1.0eq</b> /AgOTf 0.1eq | 30%                      |
| 4     | AgNTf <sub>2</sub> 0.2eq /AgOTf <b>0.5eq</b> | 28%                      |
| 5     | AgNTf <sub>2</sub> 0.2eq /AgOTf <b>1.0eq</b> | 25%                      |

[a] Unless otherwise stated, reaction conditions are as follows: **1a** (0.05 mmol), **2a** (2.0 equiv), [Cp\*IrCl<sub>2</sub>]<sub>2</sub> (5 mol%), **AgNTf<sub>2</sub> (x equiv.)**, **AgOTf (y equiv.)**, 1-AdCOOH (5.0 equiv.), PhMe (0.5 mL), under Ar, 120 °C, 24 h. [b] Isolated yields.

**Table S5. The effect of solvent<sup>[a]</sup>**

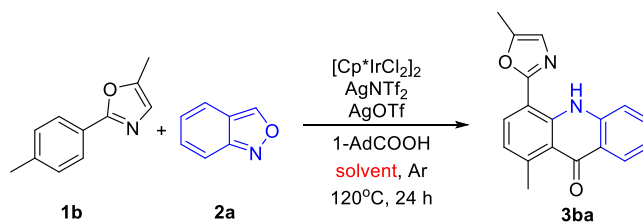

| Entry | Solvent           | Yield (%) <sup>[b]</sup> |
|-------|-------------------|--------------------------|
| 1     | PhMe              | 40                       |
| 2     | PhNO <sub>2</sub> | 62                       |

|   |                               |    |
|---|-------------------------------|----|
| 3 | DCE                           | 76 |
| 4 | DCM                           | 69 |
| 5 | CHCl <sub>3</sub>             | 76 |
| 6 | MeOH                          | ND |
| 7 | MeCN                          | 20 |
| 8 | PhNO <sub>2</sub> : DCE (4:1) | 90 |

[a] Unless otherwise stated, reaction conditions are as follows: **1a** (0.05 mmol), **2a** (2.0 equiv), [Cp\*IrCl<sub>2</sub>]<sub>2</sub> (5 mol%), AgNTf<sub>2</sub> (0.2 equiv.), AgOTf (0.1 equiv.), 1-AdCOOH (5.0 equiv.), **solvent** (0.5 mL), under Ar, 120 °C, 24 h. [b] Isolated yields.

**Table S6. The effect of transition metal catalyst<sup>[a]</sup>**

$\text{R} = \text{H } \mathbf{1a}$        $\text{R}' = \text{H } \mathbf{2a}$   
 $\text{R} = \text{Me } \mathbf{1b}$        $\text{R}' = \text{Me } \mathbf{2a}'$

$\xrightarrow[\text{1-AdCOOH, PhNO}_2:\text{DCE, Ar, 120}^\circ\text{C, 24 h}]{\text{[M], AgNTf}_2, \text{AgOTf}}$

$\mathbf{3}$       or       $\mathbf{4}$

| Entry            | Catalyst                                                  | Yield (%) <sup>[b]</sup>  |                           |
|------------------|-----------------------------------------------------------|---------------------------|---------------------------|
|                  |                                                           | <b>3ba</b> <sup>[c]</sup> | <b>4aa</b> <sup>[d]</sup> |
| 1 <sup>[e]</sup> | [IrCp*Cl <sub>2</sub> ] <sub>2</sub>                      | 25%                       | 46%                       |
| 2 <sup>[e]</sup> | [Ir(COD)Cl] <sub>2</sub>                                  | NR                        | NR                        |
| 3 <sup>[e]</sup> | [RuCl <sub>2</sub> (p-cymene) <sub>2</sub> ] <sub>2</sub> | ND                        | ND                        |
| 4 <sup>[e]</sup> | [RhCp*Cl <sub>2</sub> ] <sub>2</sub>                      | 14%                       | 30%                       |
| 5 <sup>[f]</sup> | [IrCp*Cl <sub>2</sub> ] <sub>2</sub>                      | 35%                       | 54%                       |
| 6 <sup>[f]</sup> | [RhCp*Cl <sub>2</sub> ] <sub>2</sub>                      | 18%                       | 23%                       |
| 7                | [IrCp*Cl <sub>2</sub> ] <sub>2</sub>                      | 90%                       | 60%                       |
| 8                | [RhCp*Cl <sub>2</sub> ] <sub>2</sub>                      | 65%                       | 35%                       |

[a] Unless otherwise stated, reaction conditions are as follows: **1a** (0.05 mmol), **2a** (2.0 equiv), **[M]** (5 mol%), AgNTf<sub>2</sub> (0.2 equiv.), AgOTf (0.1 equiv.), 1-AdCOOH (5.0 equiv.), PhNO<sub>2</sub>: DCE (4:1, 0.5 mL), under Ar, 120 °C, 24 h. [b] Isolated yields. [c] PhMe (0.5 mL). [d] DCE (0.5 mL). [e] 1-AdCOOH (2.5 equiv.). [f] AgNTf<sub>2</sub> (0.1

equiv.), AgOTf (0.2 equiv.).

## 4. The Scope of Substrates

**Table S7. The Substrate scope of 2-aryloxazoles**

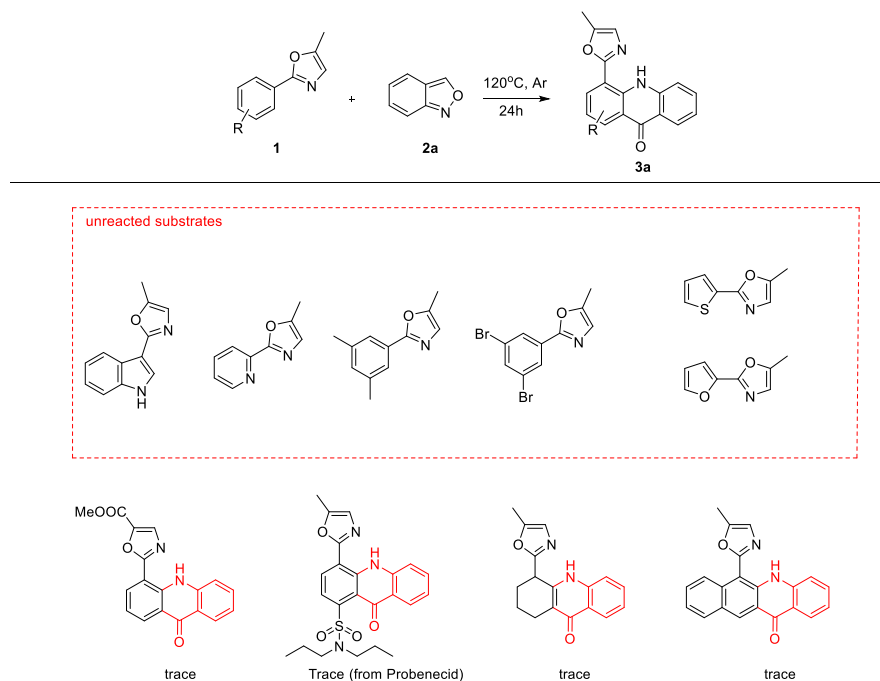

Reaction conditions: **1** (0.1 mmol), **2a** (2.0 equiv), [Cp\*IrCl<sub>2</sub>]<sub>2</sub> (5 mol%), AgNTf<sub>2</sub> (0.2 equiv.), AgOTf (0.1 equiv.), 1-AdCOOH (5.0 equiv.), PhNO<sub>2</sub>: DCE (4:1, 1.0 mL), under Ar, 120°C, 24 h, isolated yield.

**Table S8. The Substrate scope of 1 with other directing groups**

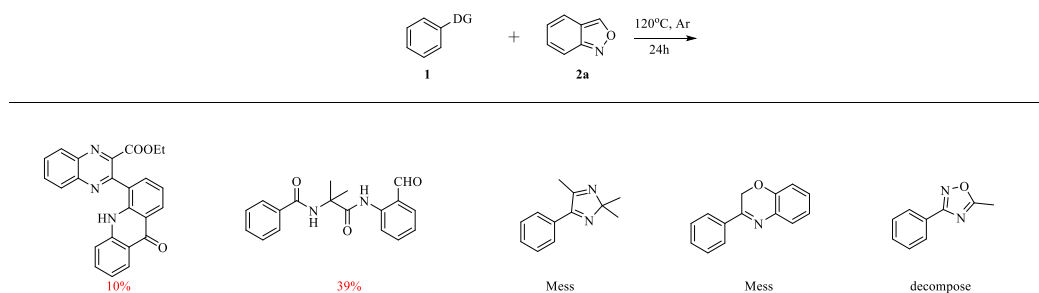

Reaction conditions: **1** (0.1 mmol), **2a** (2.0 equiv), [Cp\*IrCl<sub>2</sub>]<sub>2</sub> (5 mol%), AgNTf<sub>2</sub> (0.2 equiv.), AgOTf (0.1 equiv.), 1-AdCOOH (5.0 equiv.), PhNO<sub>2</sub>: DCE (4:1, 1.0 mL), under Ar, 120°C, 24 h, isolated yield.

## 5. Mechanistic Studies

### (1) Procedure for competition experiment

Representative procedure for competition between **1b** and **1h**: To a flame dried screw-cap tube equipped with magnetic stir bar were introduced 5-methyl-2-phenyl-oxazole **1b** (34.6 mg, 0.2

mmol), 5-methyl-2-phenyl-oxazole **1b** (35.4 mg, 1.0 equiv), anthranil **2a** (48.0 mg, 4.0 equiv), AgOTf (0.1 equiv.), 1-AdCOOH (5.0 equiv.), and [Cp\*IrCl<sub>2</sub>]<sub>2</sub> (5 mol %) and PhNO<sub>2</sub>: DCE = 4:1 (1.0 mL). The reaction mixture was stirred in preheated oil bath at 120 °C under Ar for 24 h. After completion, the reaction mixture was purified by flash chromatography eluting with ethyl acetate and petroleum ether (10:1) to give the product **3ba** (29 mg, 50%) and **3ha** (8 mg, 14%).

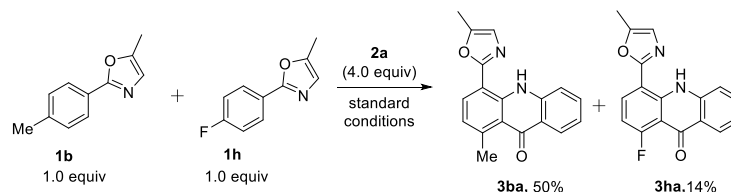

## (2) Radical trap experiments

The free radical scavenging experiments were conducted with 2,2,6,6-tetramethyl-1-piperidinyloxy (TEMPO) or 2,6-Di-tert-butyl-p-methylphenol (BHT). **1a** (0.05 mmol), **2a** (2.0 equiv.) and TEMPO (12 mg, 1.5 equiv.) or BHT (16.6 mg, 1.5 equiv.) were stirred at 120 °C for 24 h under standard conditions. After completion, the reaction mixture was purified by flash chromatography eluting with ethyl acetate and petroleum ether (10:1) to give the product **3aa**. Obviously, either TEMPO or BHT suppressed the reaction which indicated the free radical process might occurred in this reaction.

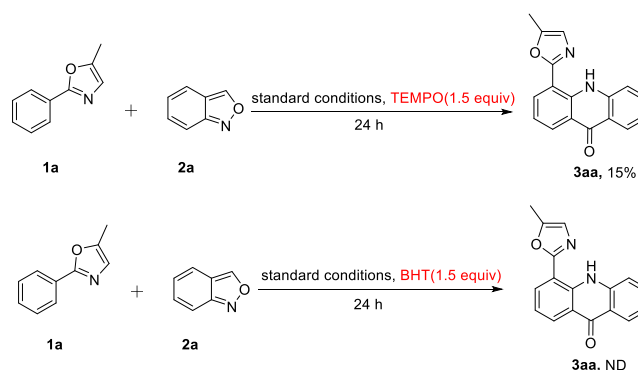

## (3) Deuterium exchange experiments

Deuterium-labeling experiments were carried out to study the mechanism of this reaction. **1a** (0.2 mmol), [Cp\*IrCl<sub>2</sub>]<sub>2</sub> (5 mol%), AgNTf<sub>2</sub> (0.2 equiv.), AgOTf (0.1 equiv.), 1-AdCOOH (5.0 equiv.) were stirred in CD<sub>3</sub>OD (1 mL) under inert Ar atmosphere at 120 °C for 12 h. After completion, the reaction was then quenched with saturated NaHCO<sub>3</sub> solution and extracted with EtOAc, washed with brine and dried over anhydrous Na<sub>2</sub>SO<sub>4</sub>. The filtrate was concentrated and the residue was purified by column chromatography (petroleum ether/ethyl acetate =10/1, v/v) to afford the products **1a** and [**D**]<sub>2</sub>-**1a**. The deuterium rate (64%) was obtained from <sup>1</sup>H NMR. Deuterium was observed at both *ortho*-positions, which indicated the possibility of the reaction pathway via *ortho* C-H activation.

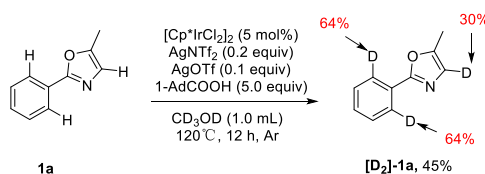



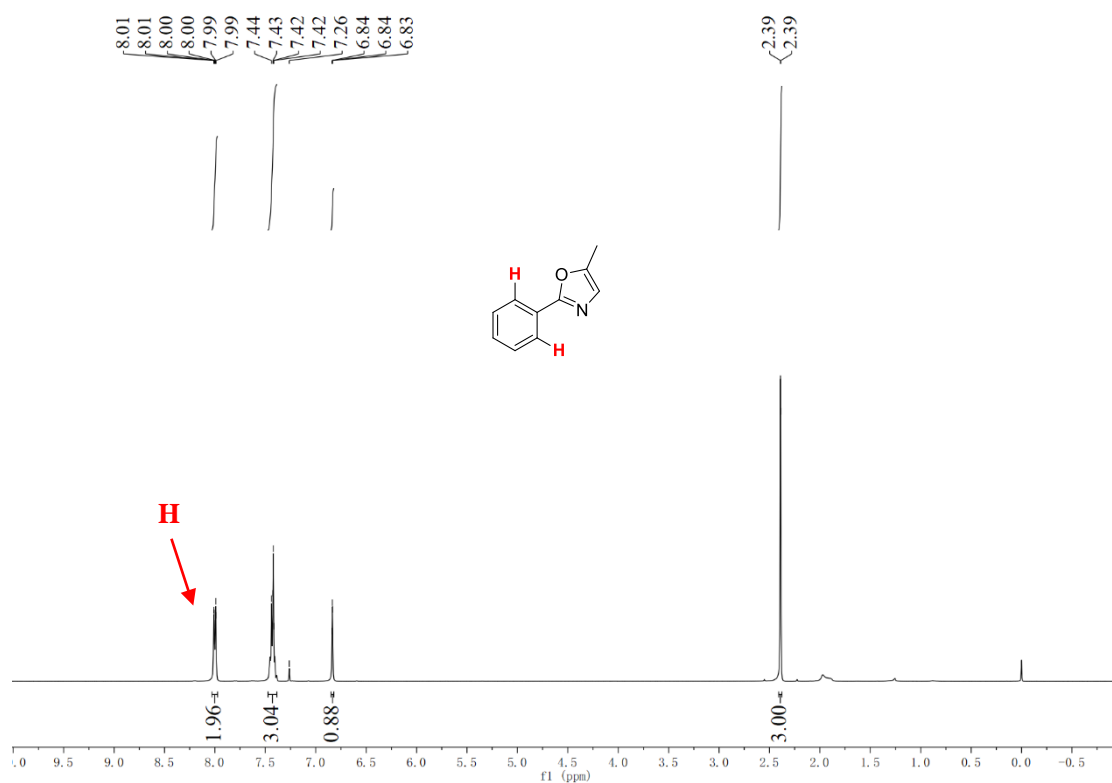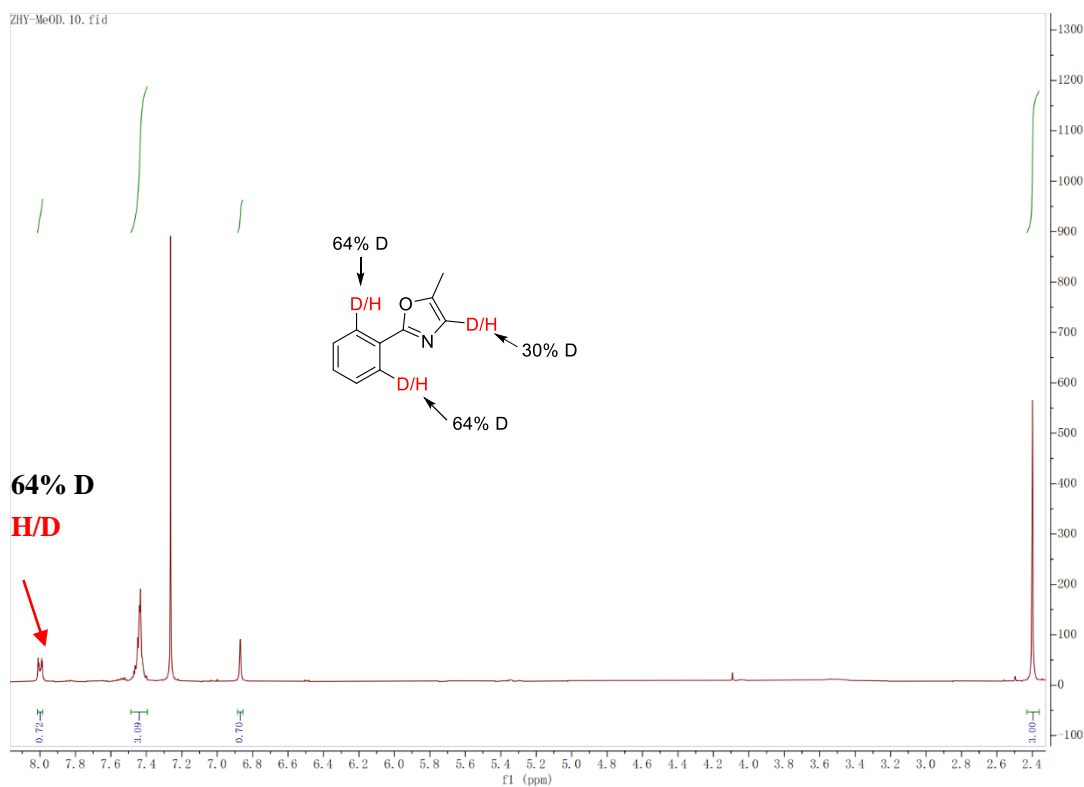

#### (4) Kinetic isotope effect (KIE) study

In addition, the kinetic isotope effect (KIE) study was conducted. **1a** (0.2 mmol), **[D<sub>5</sub>]-1a** (0.2 mmol, 99% D), and **2a** (4.0 equiv) were stirred at 120 °C for 12 h under standard conditions. After completion, the reaction mixture was purified by flash chromatography eluting with ethyl acetate

and petroleum ether (10:1) to give **3aa** and **[D]-3aa**. The ratio of two products was determined by  $^1\text{H}$  NMR integration method to give intermolecular kinetic isotopic effect (KIE)  $k_{\text{H}}/k_{\text{D}}=2.3$ .

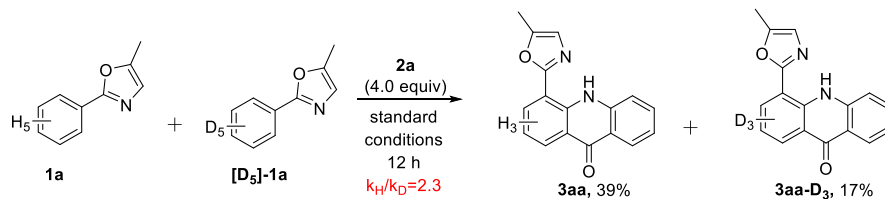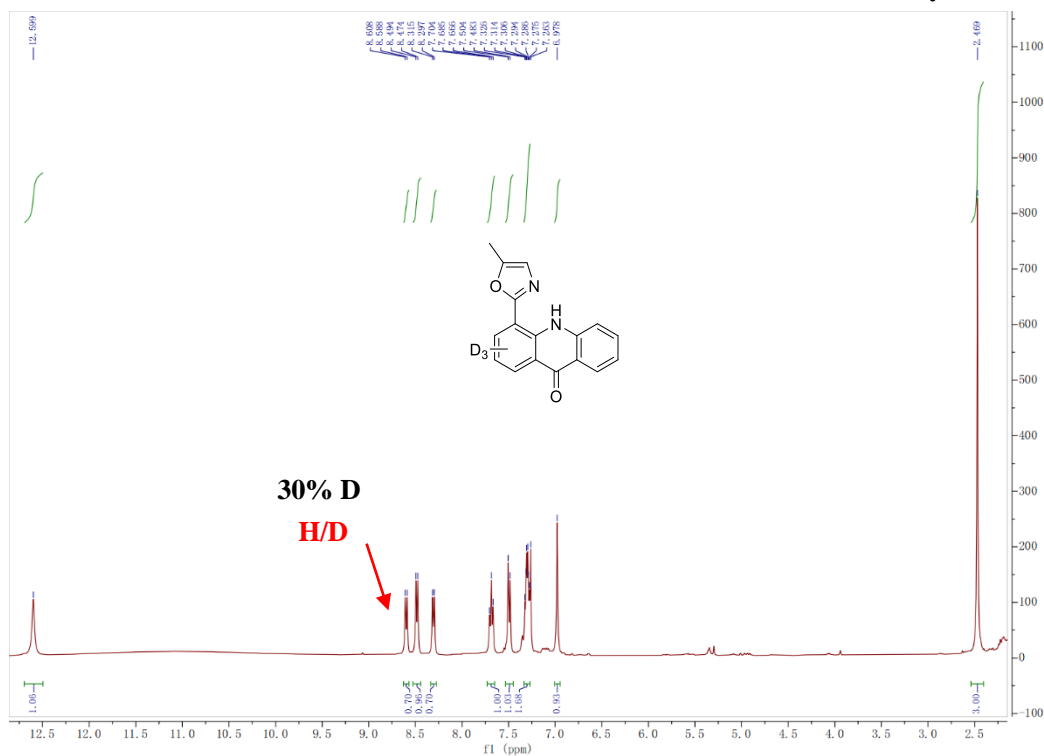

**1a** (0.2 mmol) or **[D<sub>5</sub>]-1a** (0.2 mmol, 99% D) and **2a** (4.0 equiv) were stirred at 120 °C for 12 h under standard conditions. After completion, the reaction mixture was purified by flash chromatography eluting with ethyl acetate and petroleum ether (10:1) to give **3aa** or **[D]-3aa**. The yield of two products was 42% (23 mg) and 20% (11 mg) to give intramolecular kinetic isotopic effect (KIE)  $k_{\text{H}}/k_{\text{D}}=2.1$ , thus indicating that the first C-H bond cleavage might be the product determining step.

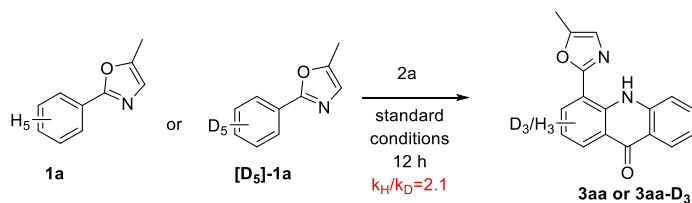



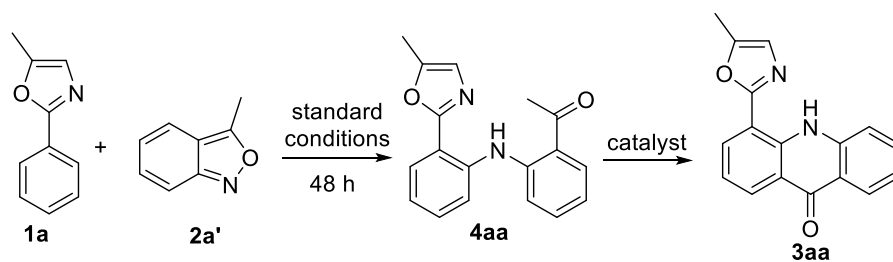

| Entry           | catalyst                                                                                                   | 3aa yield (%) |
|-----------------|------------------------------------------------------------------------------------------------------------|---------------|
| 1               | standard conditions <sup>a</sup>                                                                           | 9%            |
| 2               | standard conditions <sup>a</sup> without [Cp*IrCl <sub>2</sub> ] <sub>2</sub> , 1-AdCOOH                   | 12%           |
| 3               | standard conditions <sup>a</sup> without [Cp*IrCl <sub>2</sub> ] <sub>2</sub> , AgNTf <sub>2</sub> , AgOTf | NR            |
| 4 <sup>12</sup> | In(OTf) <sub>3</sub> , DCE, 115°C                                                                          | 45%           |

<sup>a</sup>standard conditions: **1a** (0.05 mmol), **2a'** (2.0 equiv), [Cp\*IrCl<sub>2</sub>]<sub>2</sub> (5mol%), AgNTf<sub>2</sub>(0.2 equiv.), AgOTf (0.1 equiv.), 1-AdCOOH (5.0 equiv.), PhNO<sub>2</sub>: DCE (4:1, 0.5 mL), under Ar, 120°C, 12 h,

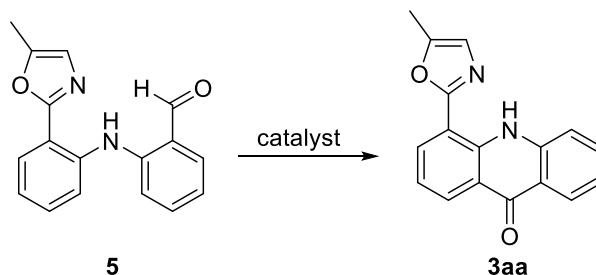

| Entry | catalyst                                                                                 | 3aa yield (%) |
|-------|------------------------------------------------------------------------------------------|---------------|
| 1     | standard conditions <sup>a</sup>                                                         | 15%           |
| 2     | standard conditions <sup>a</sup> without [Cp*IrCl <sub>2</sub> ] <sub>2</sub> , 1-AdCOOH | 18%           |

<sup>a</sup>standard conditions:[Cp\*IrCl<sub>2</sub>]<sub>2</sub> (5mol%), AgNTf<sub>2</sub>(0.2 equiv.), AgOTf (0.1 equiv.), 1-AdCOOH (5.0 equiv.), PhNO<sub>2</sub>: DCE (4:1, 0.5 mL), under Ar, 120°C, 12 h,

## 6. References

- G. L. Huang, B. Liu, M. Y. Teng, Y. G. Chen. *Synthetic Communications.*, 2014, **44**, 1786-1794.
- C. Q. Wang, L. Ye, C. Feng, T. K. Loh. *J. Am. Chem. Soc.*, 2017, **139**, 1762-1765.
- Kou, X.; Kou, K. G. M. *ACS Catal.*, 2020, **10**, 3103–3109.
- Ma, J. W.; Wang, Q. *J. Org. Chem.* 2018, **83**, 13296–13307.
- Zhang, L.; Xiao, K. *Eur. J. Org. Chem.*, 2018, **48**, 6913–6918.
- Jin, H.; Huang, L.; Xie, J.; Rudolph, M.; Rominger, F.; Hashmi, A. S. K. *Angew. Chem., Int. Ed.*, 2016, **55**, 794-797.
- Zhou, W., Yang, Y., Liu, Y., & Deng, G. *J. Green Chem.*, 2013, **15**, 76–80

## 7. Characterization Data and NMR Spectra of Acridone Derivatives

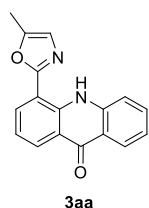

4-(5-methyloxazol-2-yl)acridin-9(10H)-one (**3aa**). 20.7 mg, 75% yield; Yellow solid; eluent (petroleum ether/ethyl acetate = 10:1). <sup>1</sup>H NMR (400 MHz, Chloroform-*d*) δ 12.59 (s, 1H), 8.59 (d, *J* = 8.1 Hz, 1H), 8.47 (d, *J* = 8.2 Hz, 1H), 8.31 (d, *J* = 7.5 Hz, 1H), 7.69 (t, *J* = 7.7 Hz, 1H), 7.50 (d, *J* = 8.3 Hz, 1H), 7.30 (q, *J* = 7.1 Hz, 2H), 6.98 (s, 1H), 2.47 (s, 3H). <sup>13</sup>C NMR (151 MHz, CDCl<sub>3</sub>) δ 178.2, 159.3, 148.5, 140.5, 138.3, 133.6, 131.1, 129.7, 127.1, 123.3, 122.2, 122.0, 121.5, 120.2, 117.7, 112.7, 11.0.

HRMS (ESI-TOF) *m/z*: [M + H]<sup>+</sup> Calcd for C<sub>17</sub>H<sub>12</sub>N<sub>2</sub>O<sub>2</sub><sup>+</sup> 277.0972; Found 277.0976.

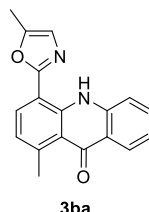

1-methyl-4-(5-methyloxazol-2-yl)acridin-9(10H)-one (**3ba**). 26.4 mg, 91% yield; Yellow solid; eluent (petroleum ether/ethyl acetate = 10:1). <sup>1</sup>H NMR (400 MHz, Chloroform-*d*) δ 12.79 (s, 1H), 8.40 (d, *J* = 8.1 Hz, 1H), 8.13 (d, *J* = 7.9 Hz, 1H), 7.70 – 7.58 (m, 1H), 7.45 (d, *J* = 8.2 Hz, 1H), 7.26 (d, *J* = 7.8 Hz, 1H), 7.02 (d, *J* = 7.9 Hz, 1H), 6.95 (s, 1H), 3.02 (s, 3H), 2.46 (s, 3H). <sup>13</sup>C NMR (101 MHz, CDCl<sub>3</sub>) δ 177.9, 159.7, 155.4, 148.8, 138.0, 135.7, 131.2, 130.0, 125.3, 123.6, 120.3, 119.7, 113.0,

105.9, 27.4, 11.3. HRMS (ESI-TOF) *m/z*: [M + H]<sup>+</sup> Calcd for C<sub>18</sub>H<sub>15</sub>N<sub>2</sub>O<sub>2</sub><sup>+</sup> 291.1128; Found 291.1123.

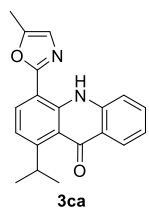

1-isopropyl-4-(5-methyloxazol-2-yl)acridin-9(10H)-one (**3ca**). 30.5 mg, 96% yield; Yellow solid; eluent (petroleum ether/ethyl acetate = 10:1). <sup>1</sup>H NMR (400 MHz, Chloroform-*d*) δ 12.79 (s, 1H), 8.40 (d, *J* = 8.1 Hz, 1H), 8.13 (d, *J* = 7.9 Hz, 1H), 7.70 – 7.58 (m, 1H), 7.45 (d, *J* = 8.2 Hz, 1H), 7.26 (d, *J* = 7.8 Hz, 1H), 7.02 (d, *J* = 7.9 Hz, 1H), 6.95 (s, 1H), 2.92 (t, 1H), 2.51 (s, 3H), 1.26 (d, 6H). <sup>13</sup>C NMR (101 MHz, CDCl<sub>3</sub>) δ 175.6, 157.4, 153.1, 146.5, 135.7, 133.3, 128.9, 127.7, 123.0, 121.2, 117.9, 117.4,

110.7, 103.6, 27.7, 25.1, 24.5, 9.0. HRMS (ESI-TOF) *m/z*: [M + H]<sup>+</sup> Calcd for C<sub>20</sub>H<sub>19</sub>N<sub>2</sub>O<sub>2</sub><sup>+</sup> 319.1441; Found 319.1446.

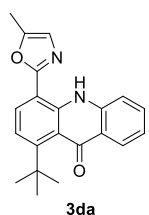

1-(tert-butyl)-4-(5-methyloxazol-2-yl)acridin-9(10H)-one (**3da**). 31.5 mg, 95% yield; Yellow solid; eluent (petroleum ether/ethyl acetate = 10:1). <sup>1</sup>H NMR (400 MHz, Chloroform-*d*) δ 12.79 (s, 1H), 8.40 (d, *J* = 8.1 Hz, 1H), 8.13 (d, *J* = 7.9 Hz, 1H), 7.70 – 7.58 (m, 1H), 7.45 (d, *J* = 8.2 Hz, 1H), 7.26 (d, *J* = 7.8 Hz, 1H), 7.02 (d, *J* = 7.9 Hz, 1H), 6.95 (s, 1H), 2.46 (s, 3H), 1.35 (s, 9H). <sup>13</sup>C NMR (101 MHz, CDCl<sub>3</sub>) δ 177.9, 159.7, 155.4, 148.8, 138.0, 135.7, 131.2, 130.0, 125.3, 123.6, 120.3, 119.7, 113.0, 105.9,

33.7, 32.1, 30.0, 27.4, 11.3. HRMS (ESI-TOF) *m/z*: [M + H]<sup>+</sup> Calcd for C<sub>21</sub>H<sub>21</sub>N<sub>2</sub>O<sub>2</sub><sup>+</sup> 333.1598; Found 333.1594.

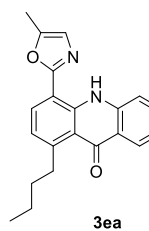

1-butyl-4-(5-methyloxazol-2-yl)acridin-9(10H)-one (**3ea**). 31.5 mg, 86% yield; Yellow solid; eluent (petroleum ether/ethyl acetate = 10:1). <sup>1</sup>H NMR (400 MHz, Chloroform-*d*) δ 12.42 (s, 1H), 8.51 (d, *J* = 8.1 Hz, 1H), 8.31 (t, *J* = 7.9 Hz, 1H), 8.23 (d, *J* = 7.5 Hz, 1H), 7.21 (d, *J* = 6.1 Hz, 2H), 7.06 (d, *J* = 8.1 Hz, 1H), 6.92 (s, 1H), 2.70 (t, *J* = 7.8 Hz, 2H), 2.40 (s, 3H), 1.64 (t, *J* = 7.7 Hz, 2H), 1.37 – 1.31 (m, 2H), 0.90 (t, *J* = 7.4 Hz, 3H). <sup>13</sup>C NMR (101 MHz, CDCl<sub>3</sub>) δ 178.2, 159.7, 149.9, 148.8,

141.0, 138.6, 131.2, 130.0, 127.3, 123.6, 122.6, 120.4, 120.1, 116.9, 112.9, 36.4, 33.5, 22.8, 14.3, 11.3. HRMS (ESI-TOF) *m/z*: [M + H]<sup>+</sup> Calcd for C<sub>21</sub>H<sub>21</sub>N<sub>2</sub>O<sub>2</sub><sup>+</sup> 333.1598; Found 333.1592.

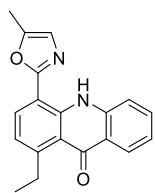

**3fa**

1-ethyl-4-(5-methyloxazol-2-yl)acridin-9(10H)-one (**3fa**). 27.4 mg, 90% yield; Yellow solid; eluent (petroleum ether/ethyl acetate = 10:1).  $^1\text{H}$  NMR (400 MHz, Chloroform-*d*)  $\delta$  12.79 (s, 1H), 8.40 (d,  $J = 8.1$  Hz, 1H), 8.13 (d,  $J = 7.9$  Hz, 1H), 7.70 – 7.58 (m, 1H), 7.45 (d,  $J = 8.2$  Hz, 1H), 7.26 (d,  $J = 7.8$  Hz, 1H), 7.02 (d,  $J = 7.9$  Hz, 1H), 6.95 (s, 1H), 3.02 (s, 2H), 2.46 (s, 3H).  $^{13}\text{C}$  NMR (101 MHz,  $\text{CDCl}_3$ )  $\delta$  176.3, 158.1, 153.8, 147.2, 136.3, 134.0, 129.5, 128.4, 123.6, 121.9, 118.6, 118.1, 111.3, 104.3, 28.4, 25.8, 9.7. (ESI-TOF)  $m/z$ :  $[\text{M} + \text{H}]^+$  Calcd for  $\text{C}_{19}\text{H}_{17}\text{N}_2\text{O}_2^+$  305.1285; Found 305.1289.

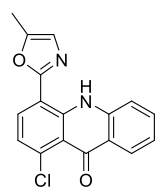

**3ga**

1-chloro-4-(5-methyloxazol-2-yl)acridin-9(10H)-one (**3ga**). 17.0 mg, 55% yield; Yellow solid; eluent (petroleum ether/ethyl acetate = 10:1).  $^1\text{H}$  NMR (400 MHz, Chloroform-*d*)  $\delta$  12.79 (s, 1H), 8.40 (d,  $J = 8.1$  Hz, 1H), 8.13 (d,  $J = 7.9$  Hz, 1H), 7.70 – 7.58 (m, 1H), 7.45 (d,  $J = 8.2$  Hz, 1H), 7.26 (d,  $J = 7.8$  Hz, 1H), 7.02 (d,  $J = 7.9$  Hz, 1H), 7.02 (s, 1H), 2.46 (s, 3H).  $^{13}\text{C}$  NMR (151 MHz, Chloroform-*d*)  $\delta$  172.5, 156.2, 155.0, 148.9, 146.5, 136.4, 134.9, 133.6, 132.7, 130.8, 128.37, 128.30, 128.1, 128.0, 127.9, 127.8, 127.6, 127.3, 127.2, 127.0, 126.0, 122.4, 122.2, 120.0, 119.4, 11.7. HRMS (ESI-TOF)  $m/z$ :  $[\text{M} + \text{H}]^+$  Calcd for  $\text{C}_{17}\text{H}_{12}\text{ClN}_2\text{O}_2^+$  311.0582; Found 311.0586.

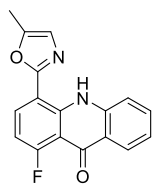

**3ha**

1-fluoro-4-(5-methyloxazol-2-yl)acridin-9(10H)-one (**3ha**). 19.7mg, 67% yield; Yellow solid; eluent (petroleum ether/ethyl acetate = 10:1).  $^1\text{H}$  NMR (400 MHz, Chloroform-*d*)  $\delta$  9.30 (d,  $J = 9.4$  Hz, 1H), 8.43 (dd,  $J = 8.0, 1.5$  Hz, 1H), 7.85 (ddd,  $J = 8.4, 6.9, 1.5$  Hz, 1H), 7.78 (dd,  $J = 8.3, 1.1$  Hz, 1H), 7.59 – 7.50 (m, 5H), 7.29 – 7.26 (m, 2H), 7.21 – 7.13 (m, 3H), 7.10 (dd,  $J = 8.0, 1.7$  Hz, 2H), 6.98 (d,  $J = 2.5$  Hz, 1H), 3.14 – 3.00 (m, 2H), 2.83 – 2.76 (m, 2H).  $^{13}\text{C}$  NMR (151 MHz, Chloroform-*d*)  $\delta$  162.6, 145.2, 145.1, 144.0, 140.5, 136.4, 134.9, 133.1, 131.6, 129.8, 128.36, 128.30, 128.2, 128.1, 128.0, 127.9, 127.8, 127.28, 127.24, 126.9, 126.0, 124.1, 122.4, 122.1, 120.8, 120.0,  $\delta$  39.99 (t,  $J = 24.4$  Hz), 28.8, 28.7.  $^{19}\text{F}$  NMR (376 MHz, Chloroform-*d*)  $\delta$  -105.45 (s,  $J = 17.1$  Hz). HRMS (ESI-TOF)  $m/z$ :  $[\text{M} + \text{H}]^+$  Calcd for  $\text{C}_{17}\text{H}_{12}\text{FN}_2\text{O}_2^+$  295.0877; Found 295.0873.

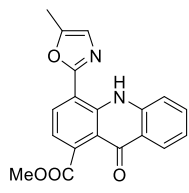

**3ia**

ethyl 4-(5-methyloxazol-2-yl)-9-oxo-9,10-dihydroacridine-1-carboxylate (**3ia**). 22.6 mg, 65% yield; Yellow solid; eluent (petroleum ether/ethyl acetate = 10:1).  $^1\text{H}$  NMR (400 MHz, Chloroform-*d*)  $\delta$  12.72 (s, 1H), 8.35 (d,  $J = 8.2$  Hz, 1H), 8.26 (d,  $J = 7.7$  Hz, 1H), 7.63 (t,  $J = 7.7$  Hz, 1H), 7.44 (d,  $J = 8.2$  Hz, 1H), 7.30 – 7.21 (m, 2H), 6.96 (s, 1H), 4.02 (d,  $J = 4.6$  Hz, 2H), 2.42 (s, 3H), 1.26 (s, 3H).  $^{13}\text{C}$  NMR (101 MHz,  $\text{CDCl}_3$ )  $\delta$  177.83, 170.75, 162.60, 149.99, 147.97, 144.40, 135.97, 131.79, 131.45, 125.65, 123.29, 119.79, 115.95, 112.51, 62.62, 14.22, 11.12.  $^{13}\text{C}$  NMR (101 MHz,  $\text{CDCl}_3$ )  $\delta$  177.8, 170.8, 162.6, 150.0, 148.0, 144.4, 136.0, 131.8, 131.5, 125.7, 123.3, 119.8, 116.0, 112.5, 62.6, 14.2, 11.1. HRMS (ESI-TOF)  $m/z$ :  $[\text{M} + \text{H}]^+$  Calcd for  $\text{C}_{19}\text{H}_{15}\text{N}_2\text{O}_4^+$  335.1026; Found 335.1023.

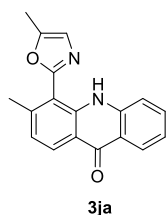

**3ja**

3-methyl-4-(5-methyloxazol-2-yl)acridin-9(10H)-one (**3ja**). 14.5 mg, 50% yield; Yellow solid; eluent (petroleum ether/ethyl acetate = 10:1).  $^1\text{H}$  NMR (400 MHz, Chloroform-*d*)  $\delta$  12.46 (s, 1H), 8.46 (d,  $J = 9.6$  Hz, 1H), 8.37 (d,  $J = 2.1$  Hz, 1H), 8.12 (d,  $J = 2.1$  Hz, 1H), 7.69 – 7.62 (m, 1H), 7.46 (d,  $J = 8.3$  Hz, 1H), 7.27 (d,  $J = 10.0$  Hz, 1H), 6.95 (s, 1H), 2.48 (d,  $J = 20.3$  Hz, 6H).  $^{13}\text{C}$  NMR (151 MHz, Chloroform-*d*)  $\delta$  176.6, 156.7, 145.9, 145.3, 144.2, 140.6, 137.2, 134.5, 128.6, 128.3,

128.2, 128.0, 127.9, 127.7, 127.15, 127.12, 126.9, 126.5, 126.0, 124.3, 122.7, 122.2, 119.9, 116.2, 112.2, 27.3, 11.2,  $\delta$  40.08 (t,  $J = 24.6$  Hz), 10.82. HRMS (ESI-TOF)  $m/z$ :  $[M + H]^+$  Calcd for  $C_{18}H_{15}N_2O_2^+$  291.1128; Found 291.1125.

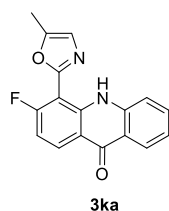

3-fluoro-4-(5-methyloxazol-2-yl)acridin-9(10H)-one (**3ka**). 18.2 mg, 62% yield; Yellow solid; eluent (petroleum ether/ethyl acetate = 10:1).  $^1H$  NMR (400 MHz, Chloroform-*d*)  $\delta$  13.01 (s, 1H), 8.62 – 8.54 (m, 1H), 8.45 (d,  $J = 7.9$  Hz, 1H), 7.68 (d,  $J = 8.0$  Hz, 1H), 7.49 (d,  $J = 8.2$  Hz, 1H), 7.31 (t,  $J = 7.7$  Hz, 2H), 7.04 (s, 1H), 2.50 (s, 3H).  $^{13}C$  NMR (101 MHz,  $CDCl_3$ )  $\delta$  176.4, 161.2, 148.1, 139.61, 139.0, 133.3, 132.6, 130.8, 130.6, 126.8, 126.0, 121.5, 121.4, 120.5, 117.7, 116.7, 109.1, 108.8, 10.1.  $^{19}F$  NMR (376 MHz, Chloroform-*d*)  $\delta$  -100.79. HRMS (ESI-TOF)  $m/z$ :  $[M + H]^+$  Calcd for  $C_{17}H_{12}FN_2O_2^+$  295.0877; Found 295.0874.

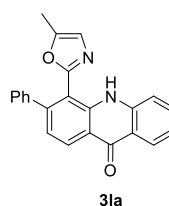

4-(5-methyloxazol-2-yl)-3-phenylacridin-9(10H)-one (**3la**). 11.3 mg, 32% yield; Yellow solid; eluent (petroleum ether/ethyl acetate = 10:1).  $^1H$  NMR (400 MHz, Chloroform-*d*)  $\delta$  8.61 (d,  $J = 8.4$  Hz, 1H), 8.47 (t,  $J = 8.5$  Hz, 1H), 7.72 – 7.65 (m, 1H), 7.51 (dd,  $J = 22.8, 10.0$  Hz, 3H), 7.41 – 7.28 (m, 5H), 6.92 (s, 1H), 1.99 (s, 3H).  $^{13}C$  NMR (101 MHz,  $CDCl_3$ )  $\delta$  177.3, 158.6, 148.4, 141.0, 138.8, 133.4, 128.8, 128.2, 127.6, 126.6, 122.7, 121.4, 120.9, 120.0, 117.1, 111.9, 11.4. HRMS (ESI-TOF)  $m/z$ :  $[M + H]^+$  Calcd for  $C_{23}H_{17}N_2O_2^+$  353.1285; Found 353.1283.

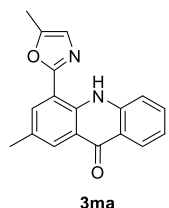

2-methyl-4-(5-methyloxazol-2-yl)acridin-9(10H)-one (**3ma**). 22.9 mg, 79% yield; Yellow solid; eluent (petroleum ether/ethyl acetate = 10:1).  $^1H$  NMR (400 MHz, Chloroform-*d*)  $\delta$  12.46 (s, 1H), 8.47 (d,  $J = 8.1$  Hz, 1H), 8.38 (s, 1H), 8.14 (d,  $J = 2.3$  Hz, 1H), 7.66 (t,  $J = 7.4$  Hz, 1H), 7.47 (d,  $J = 8.4$  Hz, 1H), 7.28 (d,  $J = 7.2$  Hz, 1H), 6.97 (s, 1H), 2.49 (d,  $J = 20.9$  Hz, 6H).  $^{13}C$  NMR (101 MHz,  $CDCl_3$ )  $\delta$  177.1, 158.4, 147.4, 139.4, 135.5, 133.3, 132.4, 131.3, 128.9, 128.2, 126.1, 122.3, 121.2, 120.7, 120.4, 116.6, 111.6, 19.9, 10.0. HRMS (ESI-TOF)  $m/z$ :  $[M + H]^+$  Calcd for  $C_{18}H_{15}N_2O_2^+$  291.1128; Found 291.1126.

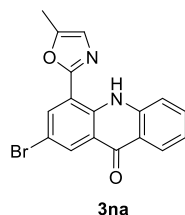

2-bromo-4-(5-methyloxazol-2-yl)acridin-9(10H)-one (**3na**). 21.2 mg, 60% yield; Yellow solid; eluent (petroleum ether/ethyl acetate = 10:1).  $^1H$  NMR (400 MHz, Chloroform-*d*)  $\delta$  12.77 (s, 1H), 8.41 (dd,  $J = 20.2, 8.3$  Hz, 2H), 7.68 (t,  $J = 7.8$  Hz, 1H), 7.57 (d,  $J = 8.7$  Hz, 1H), 7.44 (d,  $J = 8.3$  Hz, 1H), 7.30 (t,  $J = 7.4$  Hz, 1H), 7.09 (s, 1H), 2.52 (s, 3H).  $^{13}C$  NMR (101 MHz,  $CDCl_3$ )  $\delta$  178.8, 159.9, 149.2, 141.1, 138.9, 134.3, 131.7, 130.3, 127.7, 123.9, 122.8, 122.6, 122.2, 120.9, 118.4, 113.4, 11.6. HRMS (ESI-TOF)  $m/z$ :  $[M + H]^+$  Calcd for  $C_{17}H_{12}BrN_2O_2^+$  355.0077; Found 355.0072.

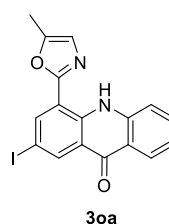

2-iodo-4-(5-methyloxazol-2-yl)acridin-9(10H)-one (**3oa**). 14.0 mg, 35% yield; Yellow solid; eluent (petroleum ether/ethyl acetate = 10:1).  $^1H$  NMR (400 MHz, Chloroform-*d*)  $\delta$  12.51 (s, 1H), 8.53 (s, 1H), 8.45 (d,  $J = 8.2$  Hz, 1H), 8.26 (s, 1H), 7.70 (d,  $J = 16.0$  Hz, 1H), 7.49 (d,  $J = 8.5$  Hz, 1H), 7.43-7.28 (m, 2H), 7.02 (s, 1H), 2.54 (s, 3H).  $^{13}C$  NMR (101 MHz,  $CDCl_3$ )  $\delta$  181.4, 161.6, 153.6, 148.9, 144.1, 142.2, 138.2, 133.1, 126.0, 124.2, 119.5, 116.0, 111.2, 106.6, 12.0. HRMS (ESI-TOF)  $m/z$ :

[M + H]<sup>+</sup> Calcd for C<sub>17</sub>H<sub>12</sub>IN<sub>2</sub>O<sub>2</sub><sup>+</sup> 402.9938; Found 402.9933.

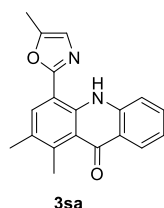

1,2-dimethyl-4-(5-methyloxazol-2-yl)acridin-9(10H)-one (**3sa**). 10.9 mg, 36% yield; Yellow solid; eluent (petroleum ether/ethyl acetate = 10:1). <sup>1</sup>H NMR (400 MHz, Chloroform-*d*) δ 12.32 (s, 1H), 8.76 (d, *J* = 8.4 Hz, 1H), 7.90 (d, *J* = 8.0 Hz, 1H), 7.58 (d, *J* = 7.1 Hz, 2H), 7.46 (d, *J* = 5.0 Hz, 1H), 7.07 (d, *J* = 5.3 Hz, 1H), 2.63 (s, 3H), 1.82 (s, 6H). <sup>13</sup>C NMR (151 MHz, Chloroform-*d*) δ 177.5, 158.5, 156.8, 149.9, 147.3, 143.4, 139.4, 135.4, 133.6, 127.7, 127.3, 127.3, 127.0, 126.9, 126.5, 126.3, 125.9, 125.8, 125.7, 125.6, 125.0, 123.3, 122.4, 120.0, 119.9, 118.7, 117.0, 114.9, δ 32.6, 30.4, 12.6. HRMS (ESI-TOF) *m/z*: [M + H]<sup>+</sup> Calcd for C<sub>19</sub>H<sub>17</sub>N<sub>2</sub>O<sub>2</sub><sup>+</sup> 305.1285; Found 305.1282.

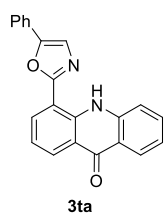

4-(5-phenyloxazol-2-yl)acridin-9(10H)-one (**3ta**). 11.1 mg, 33% yield; Yellow solid; eluent (petroleum ether/ethyl acetate = 10:1). <sup>1</sup>H NMR (400 MHz, Chloroform-*d*) δ 8.75 (d, *J* = 1.8 Hz, 1H), 8.41 (dd, *J* = 8.1, 1.4 Hz, 1H), 7.82 (ddd, *J* = 8.5, 7.0, 1.5 Hz, 1H), 7.74 (d, *J* = 7.6 Hz, 1H), 7.55 – 7.49 (m, 1H), 7.46 – 7.40 (m, 3H), 7.34 – 7.29 (m, 2H), 7.25 – 7.21 (m, 2H), 7.20 – 7.13 (m, 3H), 6.94 (d, *J* = 1.7 Hz, 1H), 3.15 – 3.00 (m, 2H), 2.85 – 2.75 (m, 2H), 2.44 (s, 3H), 1.61 (s, 3H). <sup>13</sup>C NMR (151 MHz, Chloroform-*d*) δ 177.6, 155.2, 154.4, 143.6, 139.8, 138.48, 138.42, 137.2, 134.3, 133.6, 131.7, 128.0, 127.3, 127.2, 126.9, 126.6, 126.1, 125.9, 125.2, 125.1, 124.9, 123.4, 121.8, 120.4, 119.2, 117.8. HRMS (ESI-TOF) *m/z*: [M + H]<sup>+</sup> Calcd for C<sub>22</sub>H<sub>15</sub>N<sub>2</sub>O<sub>2</sub><sup>+</sup> 339.1128; Found 339.1132.

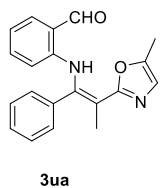

(*Z*)-2-((2-(5-methyloxazol-2-yl)-1-phenylprop-1-en-1-yl)amino)benzaldehyde (**3ua**). 6.4 mg, 20% yield; Yellow solid; eluent (petroleum ether/ethyl acetate = 10:1). <sup>1</sup>H NMR (400 MHz, Chloroform-*d*) δ 9.23 (s, 1H), 8.42 (d, *J* = 8.1 Hz, 1H), 7.82 (d, *J* = 6.4 Hz, 2H), 7.50 (t, *J* = 7.6 Hz, 1H), 7.39 (d, *J* = 6.6 Hz, 3H), 7.28 (s, 1H), 7.18 (dt, *J* = 11.5, 6.8 Hz, 4H), 7.00 (s, 1H), 6.94 (d, *J* = 7.2 Hz, 2H), 4.68 (dt, *J* = 35.1, 7.7 Hz, 1H), 3.40 (d, *J* = 7.7 Hz, 2H), 2.46 (s, 3H), 1.75 (s, 3H). <sup>13</sup>C NMR (151 MHz, Chloroform-*d*) δ 178.0, 157.9, 150.2, 147.0, 145.8, 145.5, 138.8, 138.4, 138.3, 136.3, 134.6, 133.4, 131.3, 127.8, 127.4, 127.2, 127.1, 127.0, 126.7, 126.2, 126.1, 125.0, 124.7, 119.7, 119.0, 118.9, 110.5, 110.4, 23.3, 10.7. HRMS (ESI-TOF) *m/z*: [M + H]<sup>+</sup> Calcd for C<sub>20</sub>H<sub>19</sub>N<sub>2</sub>O<sub>2</sub><sup>+</sup> 319.1441; Found 319.1445.

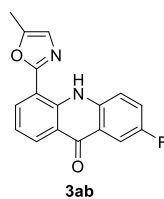

2-fluoro-5-(5-methyloxazol-2-yl)acridin-9(10H)-one (**3ab**). 19.1 mg, 65% yield; Yellow solid; eluent (petroleum ether/ethyl acetate = 10:1). <sup>1</sup>H NMR (400 MHz, Chloroform-*d*) δ 12.62 (s, 1H), 8.55 (d, *J* = 8.1 Hz, 1H), 8.51 – 8.43 (m, 1H), 8.29 (d, *J* = 7.5 Hz, 1H), 7.31 (t, *J* = 7.8 Hz, 1H), 7.13 (d, *J* = 9.8 Hz, 1H), 6.98 (d, *J* = 12.0 Hz, 2H), 2.51 (s, 3H). <sup>13</sup>C NMR (101 MHz, CDCl<sub>3</sub>) δ 177.3, 159.2, 150.4, 148.7, 142.1, 142.0, 138.5, 131.1, 130.4, 130.3, 129.6, 129.1, 124.5, 123.3, 120.7, 118.4, 112.7, 111.2, 111.0, 103.1, 102.9, 11.0. <sup>19</sup>F NMR (376 MHz, Chloroform-*d*) δ -103.24. HRMS (ESI-TOF) *m/z*: [M + H]<sup>+</sup> Calcd for C<sub>17</sub>H<sub>12</sub>FN<sub>2</sub>O<sub>2</sub><sup>+</sup> 295.0877; Found 295.0881.

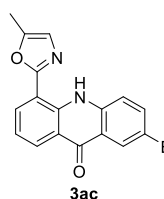

2-bromo-5-(5-methyloxazol-2-yl)acridin-9(10H)-one (**3ac**). 34.0 mg, 96% yield; Yellow solid; eluent (petroleum ether/ethyl acetate = 10:1). <sup>1</sup>H NMR (400 MHz, Chloroform-*d*) δ 12.99 (s, 1H), 8.60 – 8.52 (m, 1H), 8.43 (d, *J* = 7.9 Hz, 1H), 7.66 (d, *J* = 8.0 Hz, 1H), 7.47 (d, *J* = 8.2 Hz, 1H), 7.29 (t, *J* = 7.7 Hz, 2H), 7.02 (s, 1H), 2.48



(s, 3H).  $^{13}\text{C}$  NMR (101 MHz,  $\text{CDCl}_3$ )  $\delta$  179.8, 160.9, 150.2, 142.1, 139.9, 135.3, 132.7, 131.3, 128.7, 124.9, 123.8, 123.6, 123.2, 121.9, 119.4, 114.4, 12.6. HRMS (ESI-TOF)  $m/z$ :  $[\text{M} + \text{H}]^+$  Calcd for  $\text{C}_{32}\text{H}_{24}\text{F}_2\text{N}_2\text{O}^+$  491.1935 and  $\text{C}_{17}\text{H}_{12}\text{BrN}_2\text{O}_2^+$  355.0077; Found 355.0074.

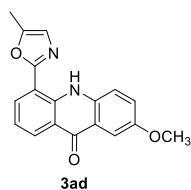

2-methoxy-5-(5-methyloxazol-2-yl)acridin-9(10H)-one (**3ad**). 10.4 mg, 34% yield; Yellow solid; eluent (petroleum ether/ethyl acetate = 8:1).  $^1\text{H}$  NMR (400 MHz, Chloroform-*d*)  $\delta$  12.55 (s, 1H), 8.61 (d,  $J = 7.9$  Hz, 1H), 8.31 (d,  $J = 7.5$  Hz, 1H), 7.87 (s, 1H), 7.47 (d,  $J = 8.9$  Hz, 1H), 7.39 – 7.28 (m, 2H), 6.98 (s, 1H), 3.95 (s, 3H), 2.51 (s, 3H).  $^{13}\text{C}$  NMR (101 MHz,  $\text{CDCl}_3$ )  $\delta$  177.6, 159.4, 155.1, 148.5, 137.7, 135.4, 130.9, 129.7, 125.0, 123.3, 120.0, 119.4, 112.7, 105.6, 55.8, 11.0. HRMS (ESI-TOF)  $m/z$ :  $[\text{M} + \text{H}]^+$  Calcd for  $\text{C}_{18}\text{H}_{14}\text{N}_2\text{O}_3^+$  307.1077; Found 307.1073.

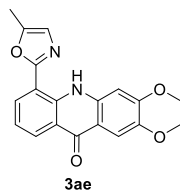

2,3-dimethoxy-5-(5-methyloxazol-2-yl)acridin-9(10H)-one (**3ae**). 17.5 mg, 52% yield; Yellow solid; eluent (petroleum ether/ethyl acetate = 5:1).  $^1\text{H}$  NMR (400 MHz, Chloroform-*d*)  $\delta$  9.16 (dd,  $J = 8.7, 1.3$  Hz, 1H), 8.04 (dt,  $J = 8.4, 1.4$  Hz, 1H), 7.76 (d,  $J = 2.9$  Hz, 1H), 7.57 (ddd,  $J = 8.7, 7.2, 1.5$  Hz, 1H), 7.51 – 7.43 (m, 6H), 7.33 (d,  $J = 2.9$  Hz, 1H), 7.27 (d,  $J = 4.2$  Hz, 2H), 7.24 (d,  $J = 1.7$  Hz, 1H), 7.21 – 7.17 (m, 1H), 7.12 – 7.08 (m, 2H), 3.88 (s, 3H), 3.77 (s, 3H), 2.51 (s, 3H).  $^{13}\text{C}$  NMR (151 MHz, Chloroform-*d*)  $\delta$  176.8, 162.3, 158.6, 145.9, 141.3, 139.9, 136.9, 134.5, 129.7, 128.6, 124.8, 123.7, 122.1, 120.8, 106.1, 55.9, 41.1, 11.8. HRMS (ESI-TOF)  $m/z$ :  $[\text{M} + \text{H}]^+$  Calcd for  $\text{C}_{19}\text{H}_{17}\text{N}_2\text{O}_4^+$  337.1183; Found 337.1185.

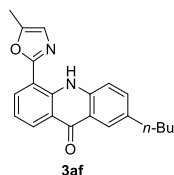

2-butyl-5-(5-methyloxazol-2-yl)acridin-9(10H)-one (**3af**). 20.6 mg, 62% yield; Yellow solid; eluent (petroleum ether/ethyl acetate = 10:1).  $^1\text{H}$  NMR (400 MHz, Chloroform-*d*)  $\delta$  12.42 (s, 1H), 8.51 (d,  $J = 8.1$  Hz, 1H), 8.31 (t,  $J = 7.9$  Hz, 1H), 8.23 (d,  $J = 7.5$  Hz, 1H), 7.21 (d,  $J = 6.1$  Hz, 2H), 7.06 (d,  $J = 8.1$  Hz, 1H), 6.92 (s, 1H), 2.70 (t,  $J = 7.8$  Hz, 2H), 2.40 (s, 3H), 1.64 (t,  $J = 7.7$  Hz, 2H), 1.37 – 1.31 (m, 2H), 0.90 (t,  $J = 7.4$  Hz, 3H).  $^{13}\text{C}$  NMR (101 MHz,  $\text{CDCl}_3$ )  $\delta$  177.9, 159.4, 149.6, 148.5, 140.7, 138.3, 130.9, 129.7, 127.0, 123.3, 122.3, 120.1, 119.8, 116.6, 112.6, 36.1, 33.2, 22.5, 14.0, 11.0. HRMS (ESI-TOF)  $m/z$ :  $[\text{M} + \text{H}]^+$  Calcd for  $\text{C}_{21}\text{H}_{21}\text{N}_2\text{O}_2^+$  333.1598; Found 333.1594.

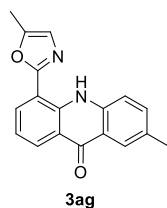

2-methyl-5-(5-methyloxazol-2-yl)acridin-9(10H)-one (**3ag**). 23.8 mg, 82% yield; Yellow solid; eluent (petroleum ether/ethyl acetate = 10:1).  $^1\text{H}$  NMR (400 MHz, Chloroform-*d*)  $\delta$  11.25 (s, 1H), 7.95 (d,  $J = 7.9$  Hz, 1H), 7.80 (d,  $J = 8.1$  Hz, 1H), 7.52 (d,  $J = 7.6$  Hz, 1H), 7.47 (d,  $J = 7.8$  Hz, 1H), 7.32 (d,  $J = 7.9$  Hz, 1H), 7.01 (d,  $J = 7.3$  Hz, 1H), 6.94 (s, 1H), 2.63 (s, 3H), 2.38 (s, 3H).  $^{13}\text{C}$  NMR (101 MHz,  $\text{CDCl}_3$ )  $\delta$  174.1, 157.4, 146.4, 138.4, 137.5, 136.4, 134.4, 133.3, 130.9, 128.2, 126.1, 125.3, 124.2, 121.5, 121.3, 112.5, 110.4, 21.8, 11.3. HRMS (ESI-TOF)  $m/z$ :  $[\text{M} + \text{H}]^+$  Calcd for  $\text{C}_{18}\text{H}_{15}\text{N}_2\text{O}_2^+$  291.1128; Found 291.1125.

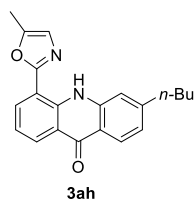

3-butyl-5-(5-methyloxazol-2-yl)acridin-9(10H)-one (**3ah**). 25.9 mg, 78% yield; Yellow solid; eluent (petroleum ether/ethyl acetate = 10:1).  $^1\text{H}$  NMR (400 MHz, Chloroform-*d*)  $\delta$  12.50 (s, 1H), 8.59 (d,  $J = 8.1$  Hz, 1H), 8.39 (t,  $J = 7.9$  Hz, 1H), 8.31 (d,  $J = 7.5$  Hz, 1H), 7.29 (d,  $J = 6.1$  Hz, 2H), 7.14 (d,  $J = 8.1$  Hz, 1H), 7.00 (s,

1H), 2.77 (t,  $J = 7.8$  Hz, 2H), 2.48 (s, 3H), 1.72 (t,  $J = 7.7$  Hz, 2H), 1.44 – 1.38 (m, 2H), 0.97 (t,  $J = 7.4$  Hz, 3H).  $^{13}\text{C}$  NMR (101 MHz,  $\text{CDCl}_3$ )  $\delta$  176.2, 157.7, 147.9, 146.8, 139.0, 136.6, 129.2, 128.0, 125.3, 121.6, 120.6, 118.4, 118.1, 114.9, 110.9, 34.4, 31.5, 20.8, 12.3, 9.3. HRMS (ESI-TOF)  $m/z$ :  $[\text{M} + \text{H}]^+$  Calcd for  $\text{C}_{21}\text{H}_{21}\text{N}_2\text{O}_2^+$  333.1598; Found 333.1596.

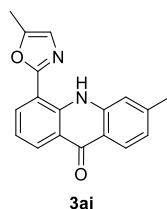

3-methyl-5-(5-methyloxazol-2-yl)acridin-9(10H)-one (**3ai**). 24.4 mg, 84% yield; Yellow solid; eluent (petroleum ether/ethyl acetate = 10:1)  $^1\text{H}$  NMR (400 MHz, Chloroform- $d$ )  $\delta$  12.47 (s, 1H), 8.47 (d,  $J = 8.1$  Hz, 1H), 8.39 (s, 1H), 8.14 (d,  $J = 2.3$  Hz, 1H), 7.67 (t,  $J = 7.4$  Hz, 1H), 7.48 (d,  $J = 8.4$  Hz, 1H), 7.28 (d,  $J = 7.2$  Hz, 1H), 6.97 (s, 1H), 2.50 (d,  $J = 20.9$  Hz, 6H).  $^{13}\text{C}$  NMR (101 MHz,  $\text{CDCl}_3$ )  $\delta$  178.1, 159.4, 148.4, 140.4, 136.5, 134.4, 133.4, 132.3, 129.9, 129.2, 127.1, 123.3, 122.2, 121.7, 121.4, 117.6, 112.6, 20.9, 11.0. HRMS (ESI-TOF)  $m/z$ :  $[\text{M} + \text{H}]^+$  Calcd for  $\text{C}_{18}\text{H}_{15}\text{N}_2\text{O}_2^+$  291.1128; Found 291.1133.

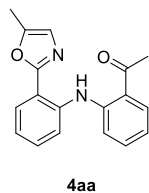

1-(2-((2-(5-methyloxazol-2-yl)phenyl)amino)phenyl)ethan-1-one (**4aa**). 17.5 mg, 60% yield; Yellow solid; eluent (petroleum ether/ethyl acetate = 10:1).  $^1\text{H}$  NMR (400 MHz, Chloroform- $d$ )  $\delta$  11.33 (s, 1H), 7.97 (d,  $J = 7.9$  Hz, 1H), 7.80 (d,  $J = 8.0$  Hz, 1H), 7.52 (t,  $J = 9.8$  Hz, 2H), 7.28 (dd,  $J = 19.0, 11.0$  Hz, 2H), 7.00 (t,  $J = 7.6$  Hz, 1H), 6.94 (s, 1H), 6.87 (t,  $J = 7.6$  Hz, 1H), 2.64 (s, 3H), 2.39 (s, 3H).  $^{13}\text{C}$  NMR (101 MHz,  $\text{CDCl}_3$ )  $\delta$  196.7, 181.7, 161.9, 153.9, 149.2, 144.4, 142.5, 138.5, 133.4, 126.3, 124.4, 119.8, 116.3, 111.5, 106.9, 30.3, 12.3. HRMS (ESI-TOF)  $m/z$ :  $[\text{M} + \text{H}]^+$  Calcd for  $\text{C}_{18}\text{H}_{17}\text{N}_2\text{O}_2^+$  293.1285; Found 293.1282.

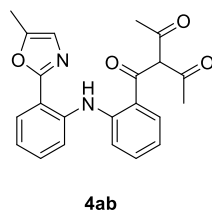

3-(2-((2-(5-methyloxazol-2-yl)phenyl)amino)benzoyl)pentane-2,4-dione (**4ab**). 12.0mg, 32% yield; Yellow solid; eluent (petroleum ether/ethyl acetate = 10:1).  $^1\text{H}$  NMR (400 MHz, Chloroform- $d$ )  $\delta$  9.45 – 9.38 (m, 1H), 8.42 (d,  $J = 8.0$  Hz, 1H), 7.87 (dd,  $J = 8.0, 1.6$  Hz, 1H), 7.82 (d,  $J = 4.0$  Hz, 2H), 7.62 (ddd,  $J = 8.8, 7.1, 1.6$  Hz, 1H), 7.55 – 7.47 (m, 4H), 7.38 (t,  $J = 7.6$  Hz, 2H), 7.28 (s, 1H), 5.29 – 5.14 (m, 1H), 3.83 – 3.74 (m, 2H), 2.65 (d,  $J = 2.7$  Hz, 3H).  $^{13}\text{C}$  NMR (101 MHz,  $\text{CDCl}_3$ )  $\delta$  196.7, 181.7, 161.9, 153.9, 149.2, 144.4, 142.5, 138.5, 133.4, 126.3, 124.4, 119.8, 116.3, 111.5, 106.9, 30.3, 12.3. HRMS (ESI-TOF)  $m/z$ :  $[\text{M} + \text{H}]^+$  Calcd for  $\text{C}_{22}\text{H}_{21}\text{N}_2\text{O}_4^+$  377.1496; Found 377.1499.

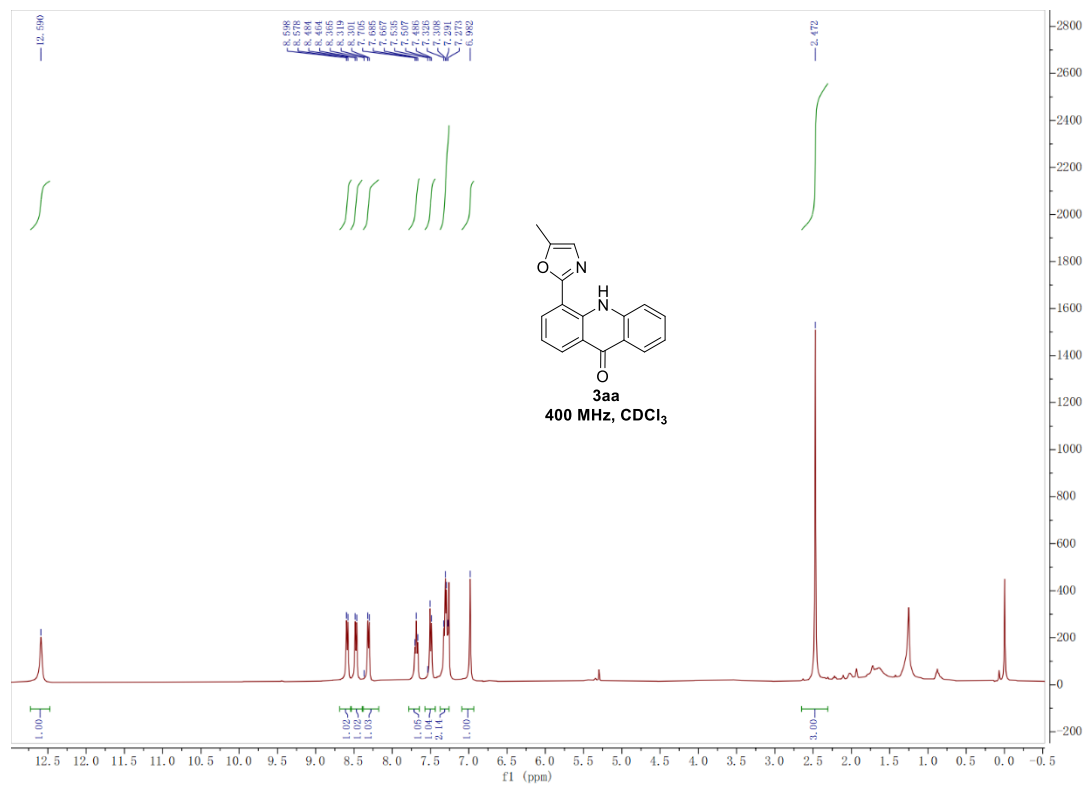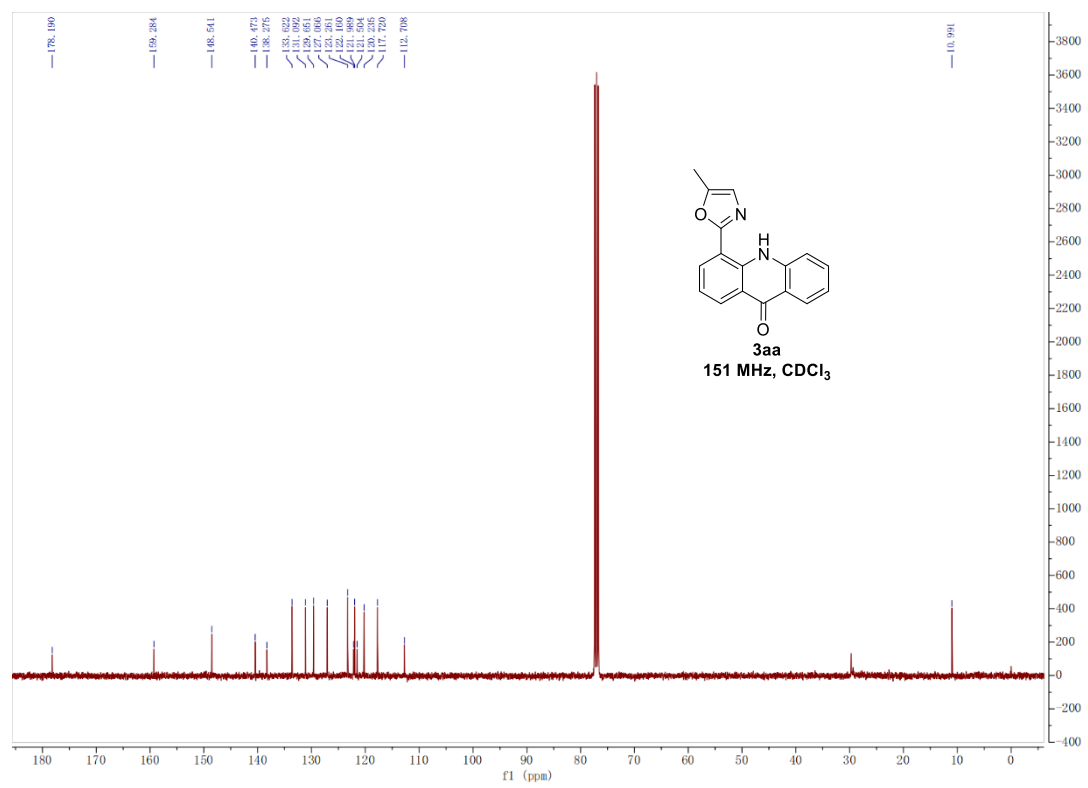

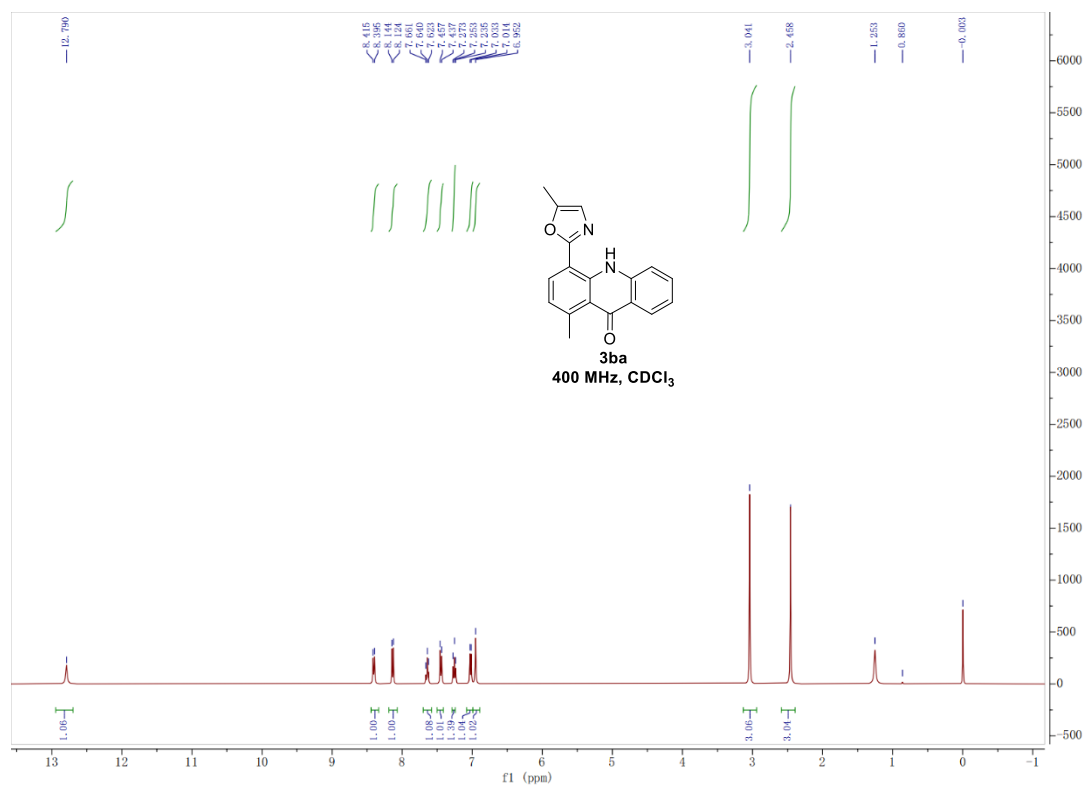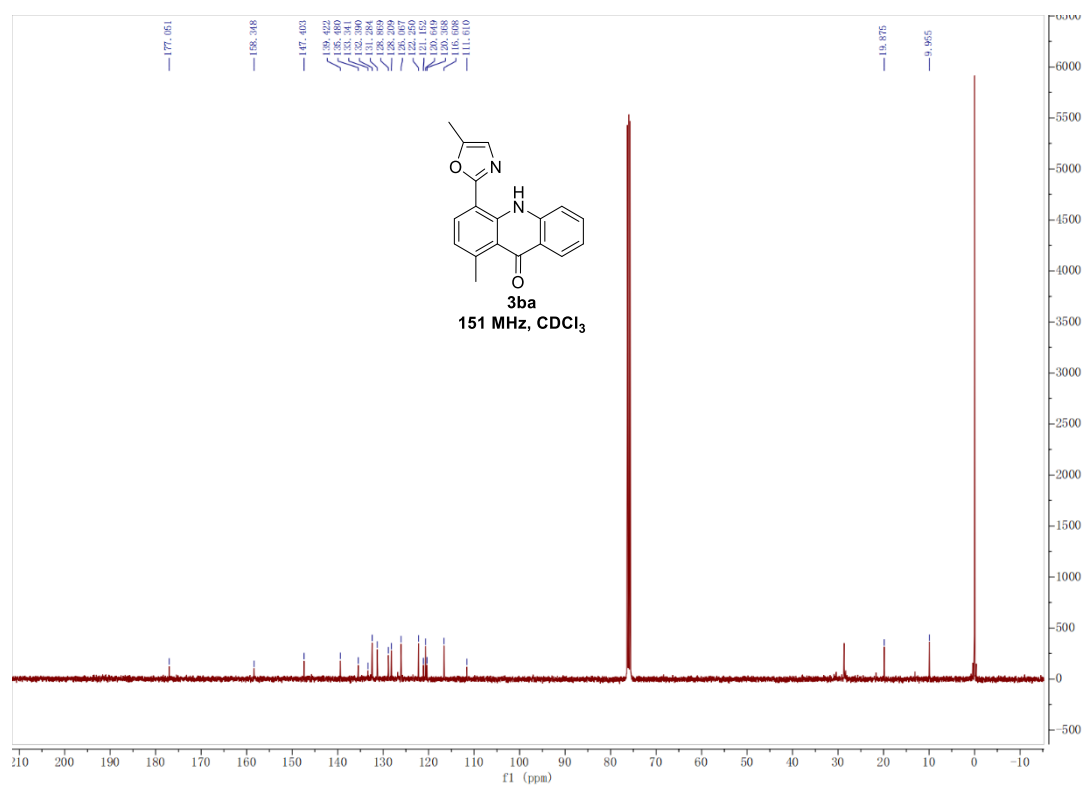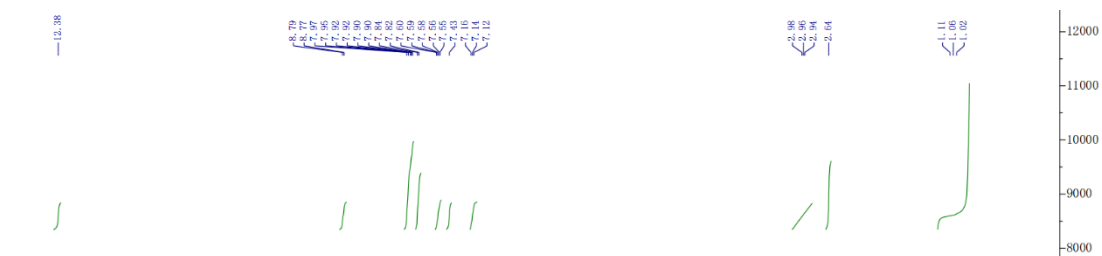

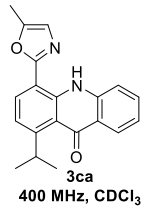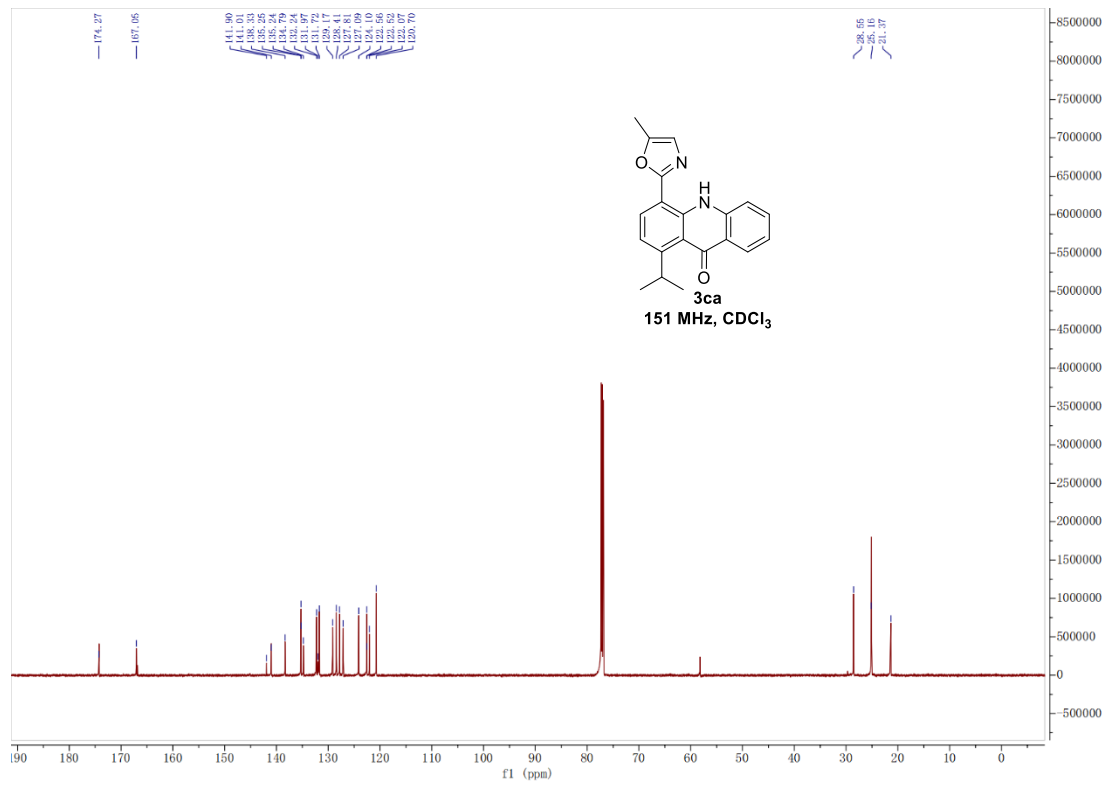

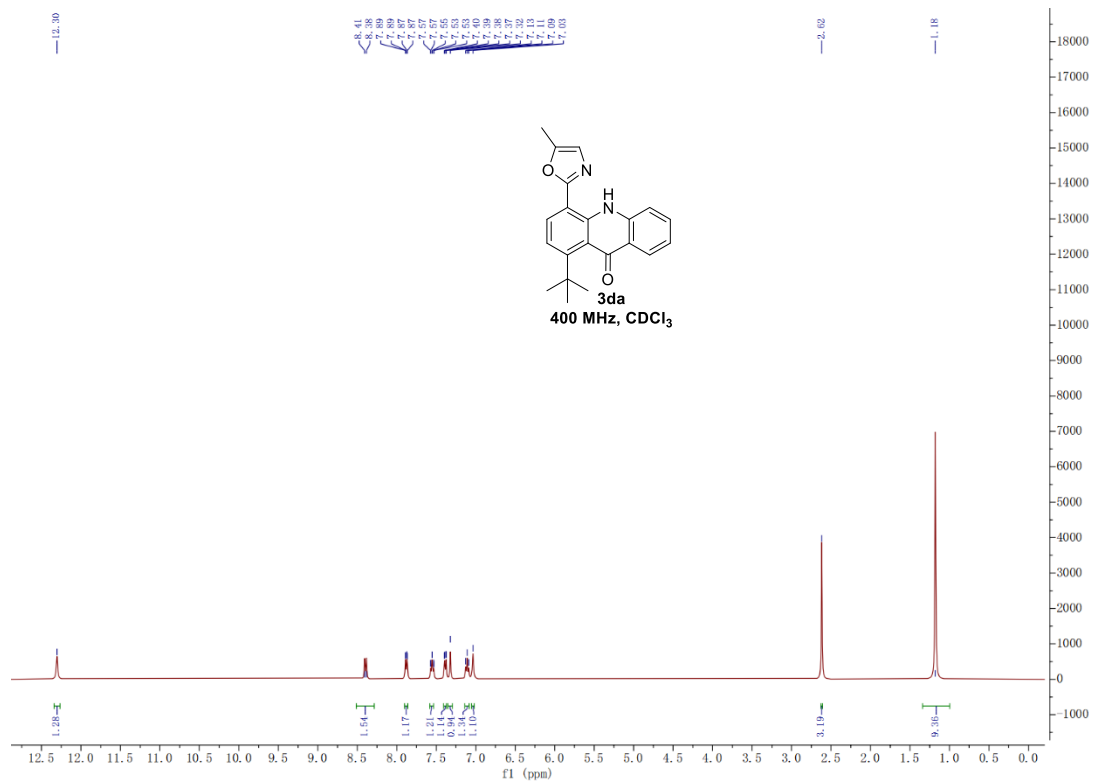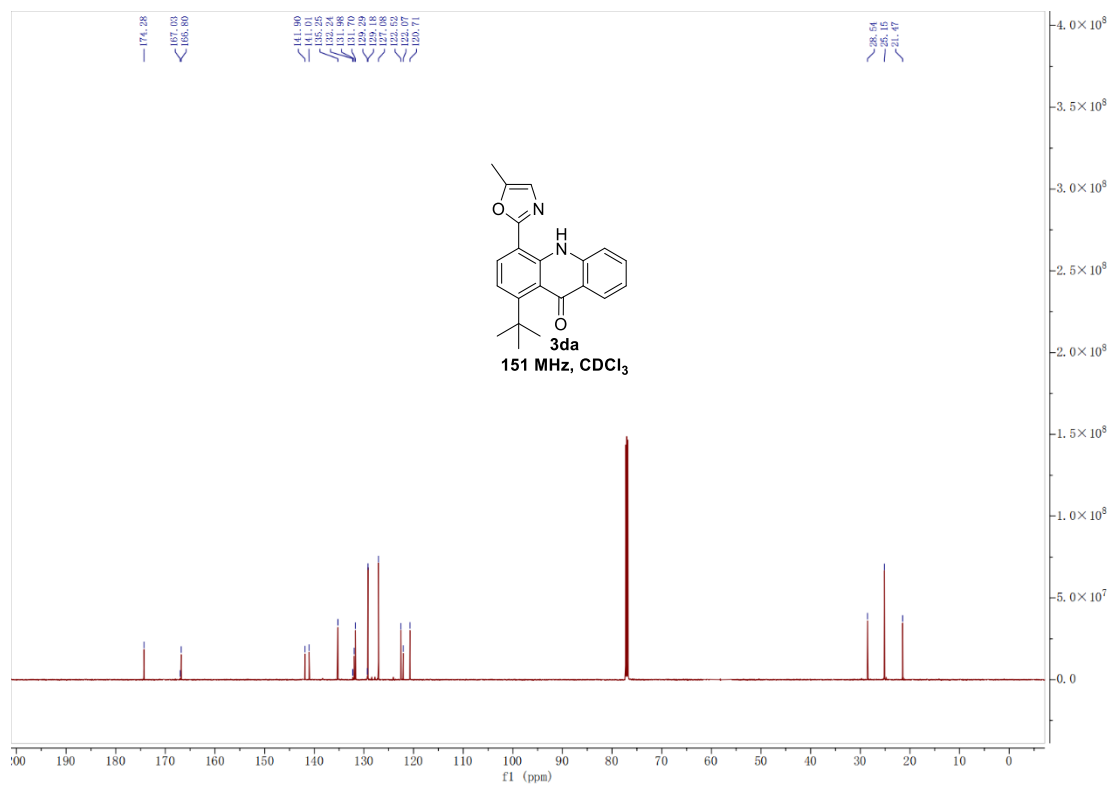

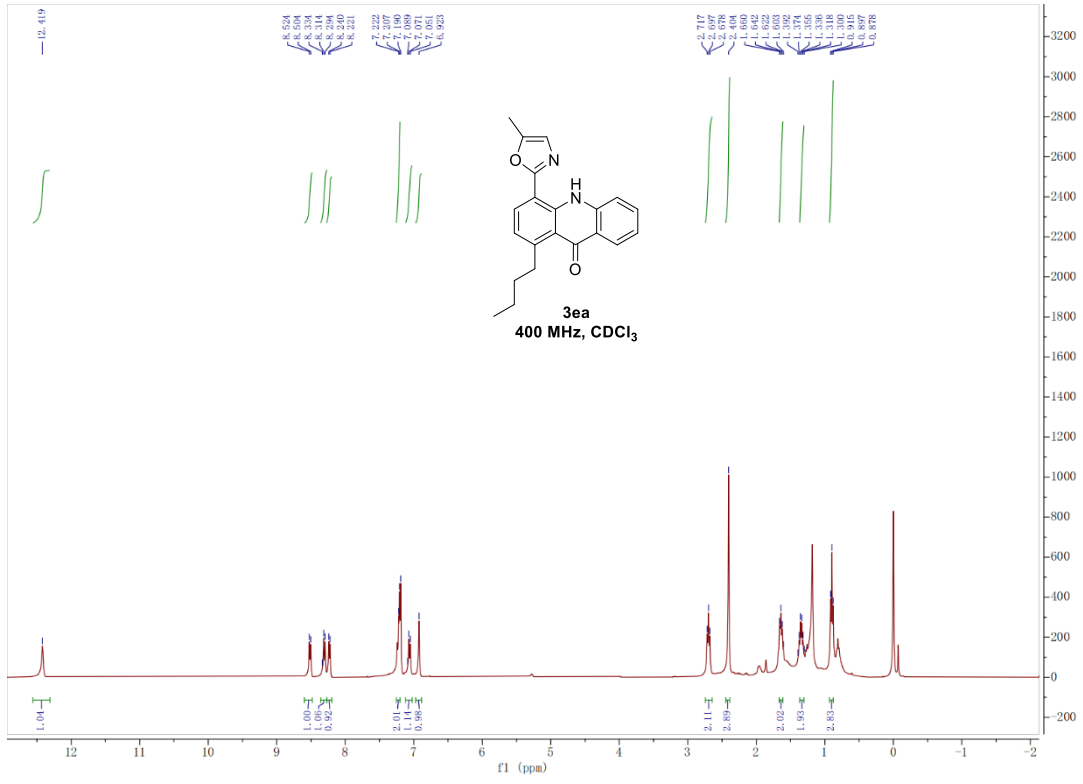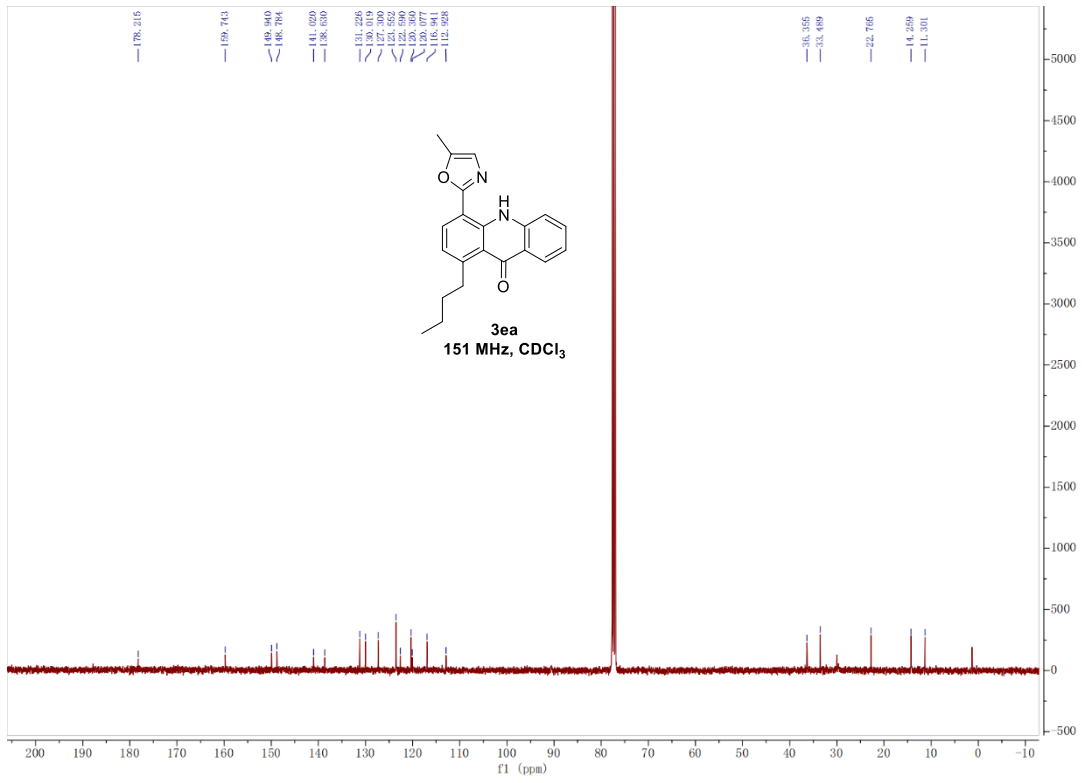

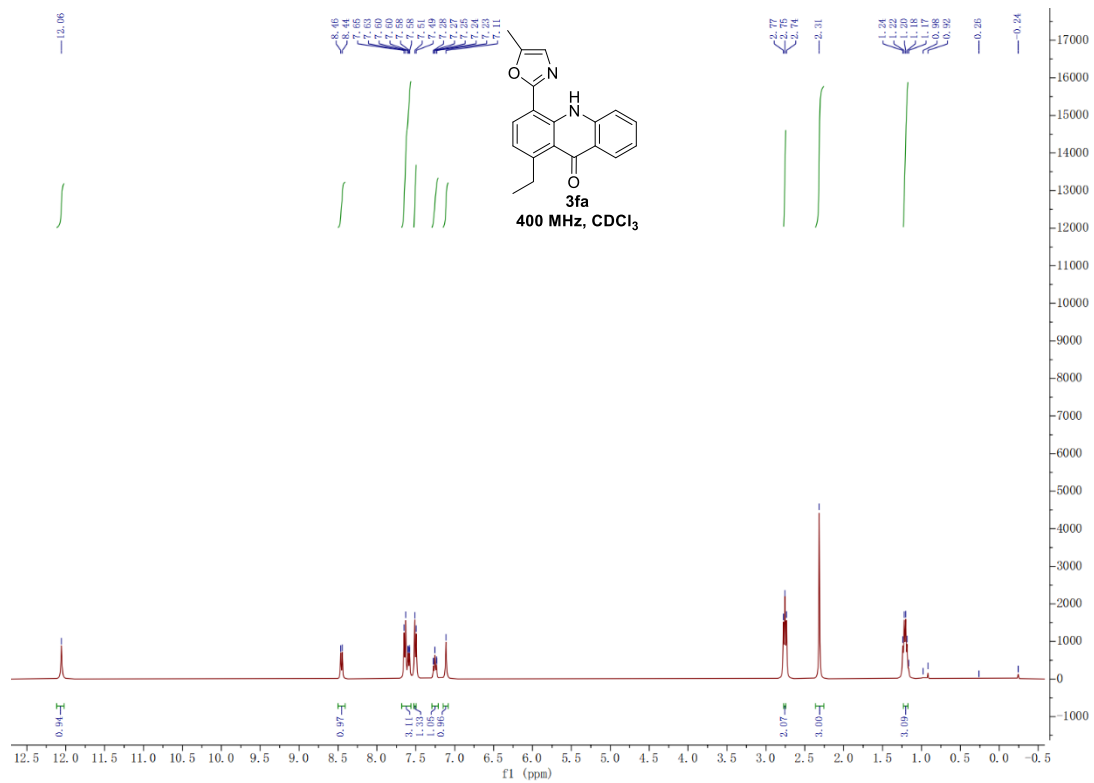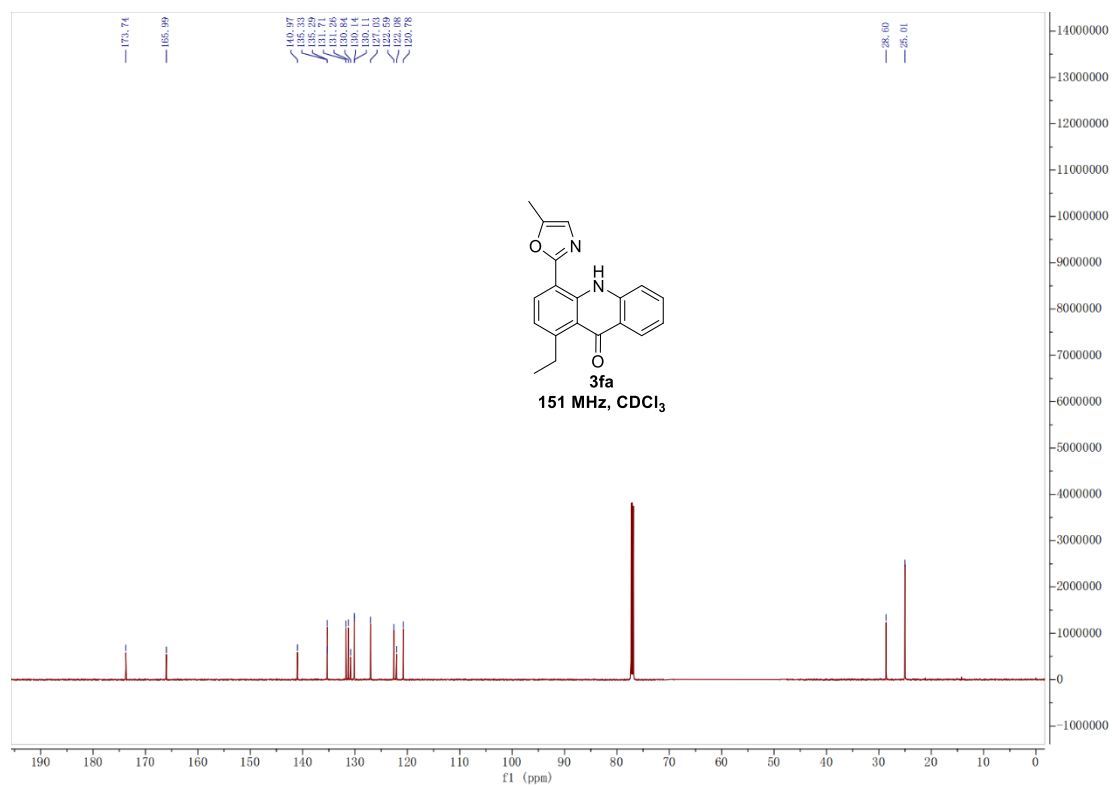



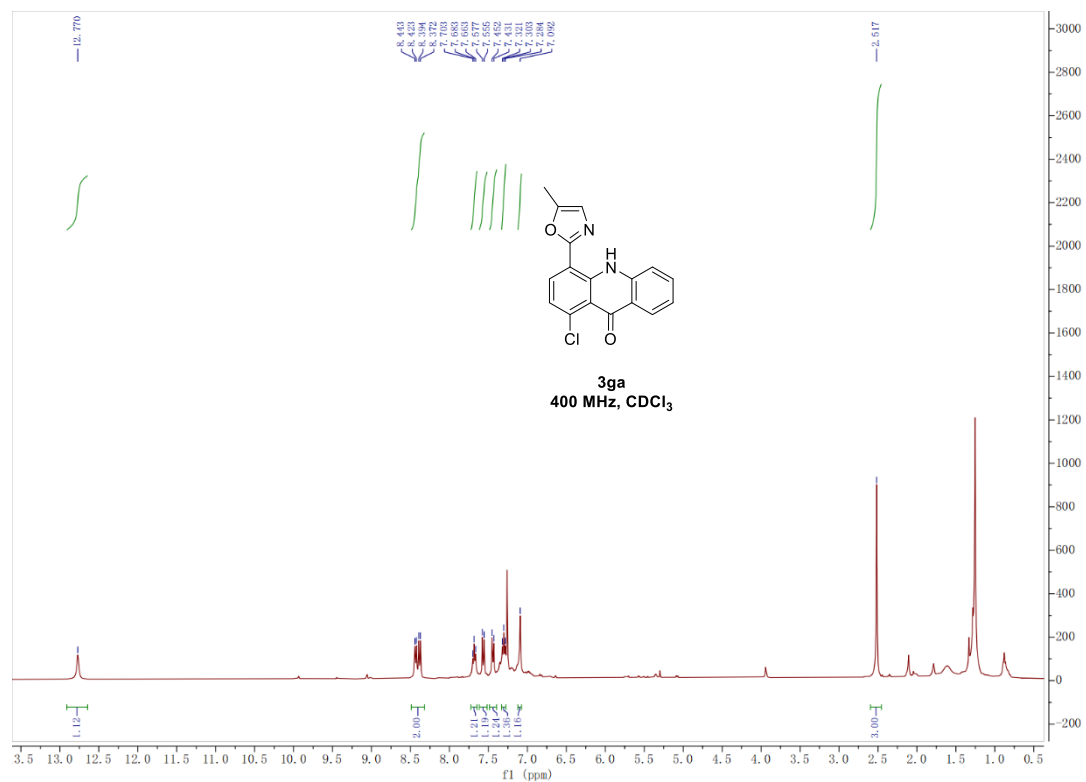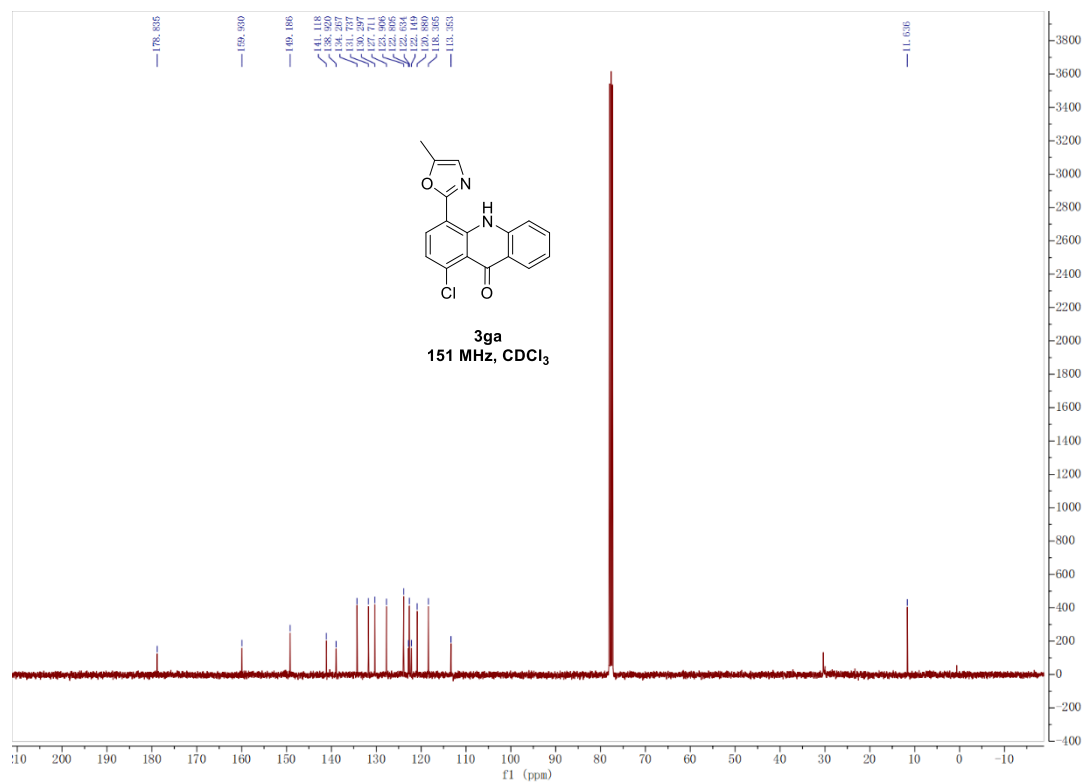

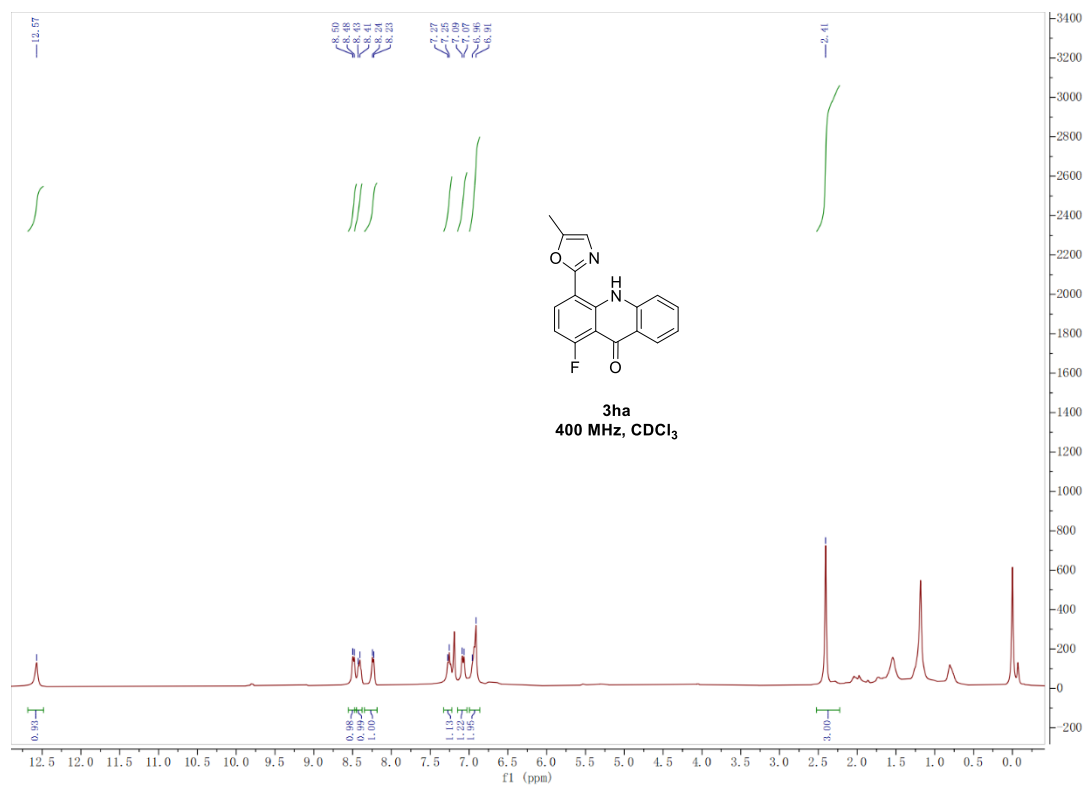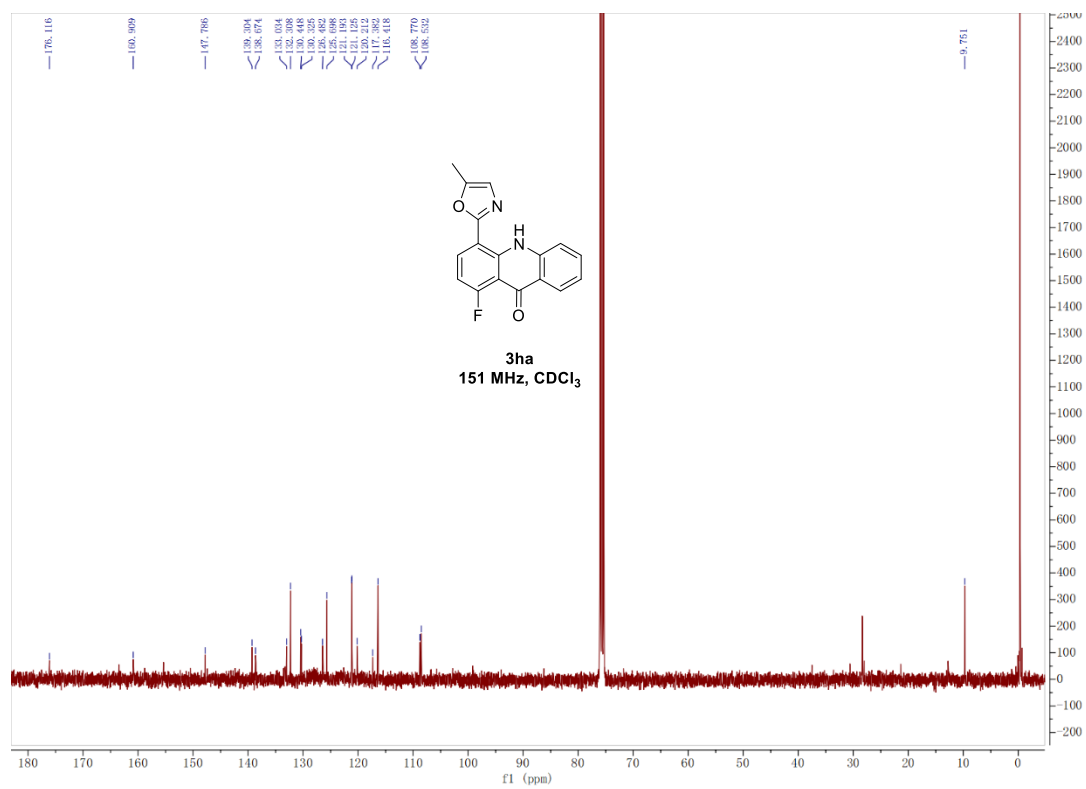

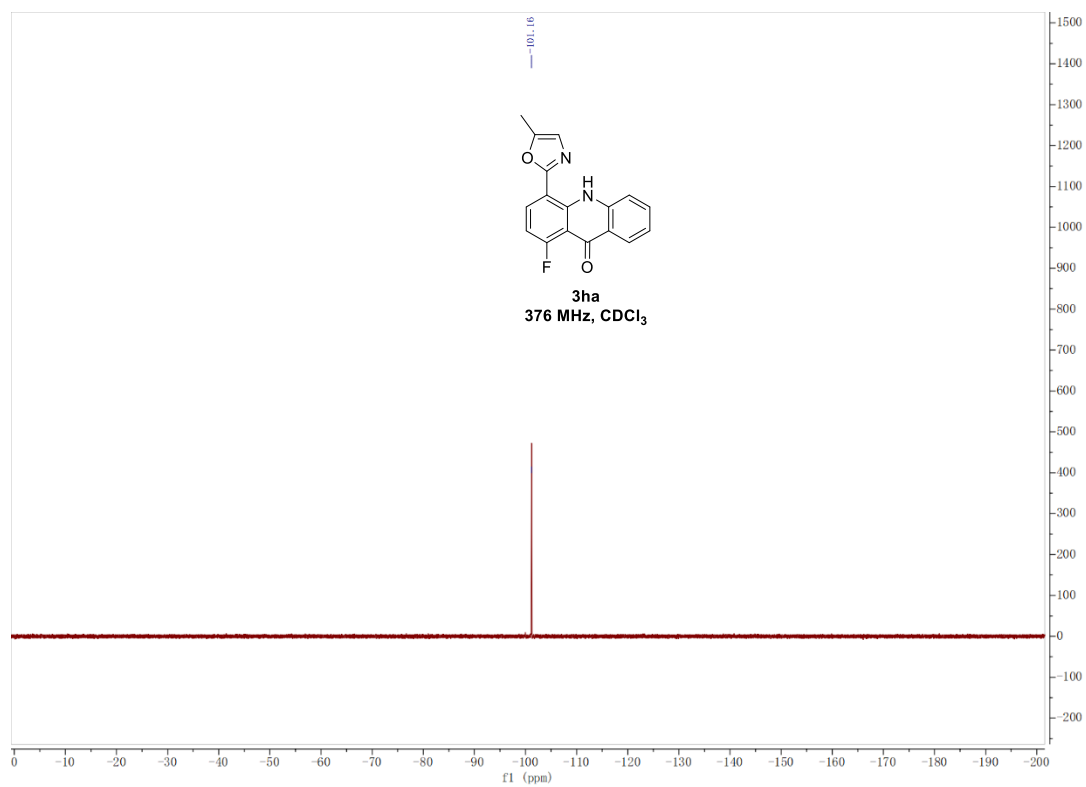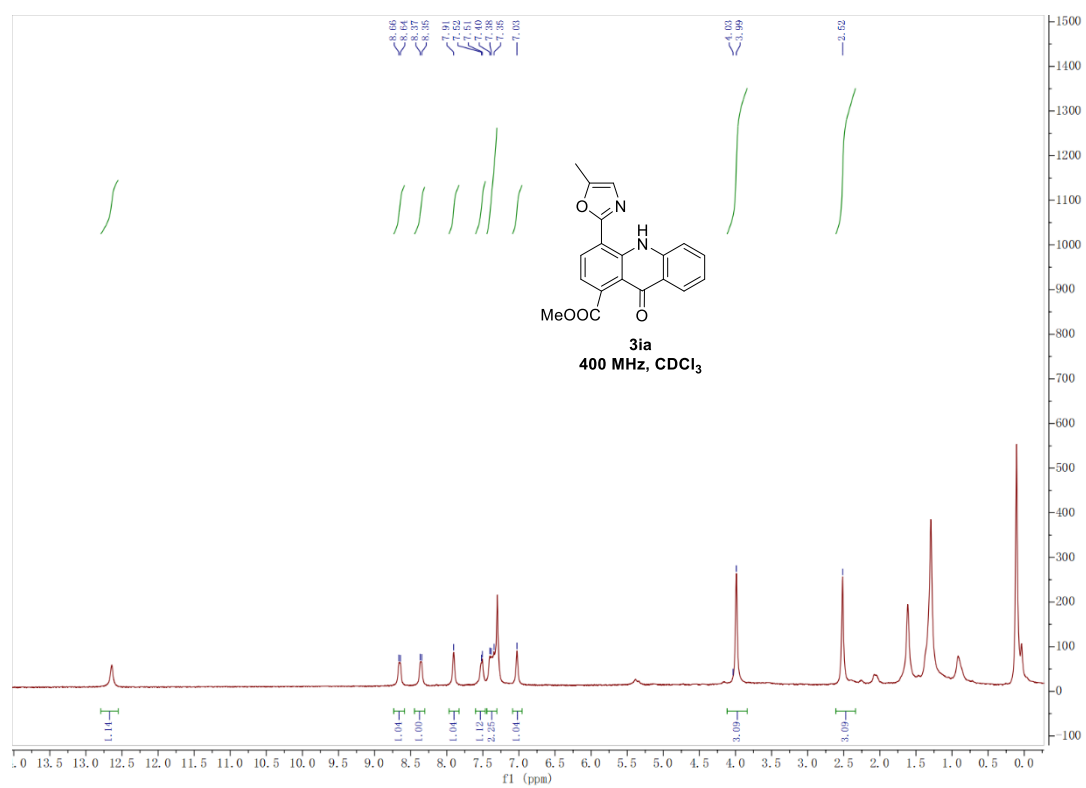

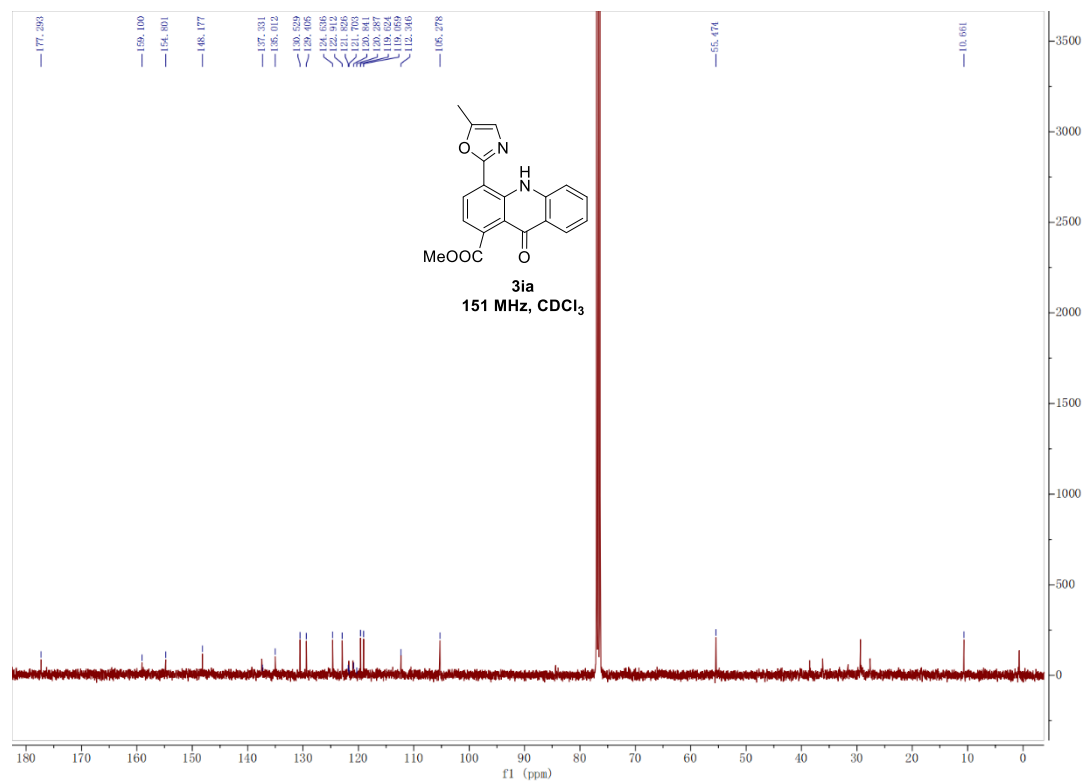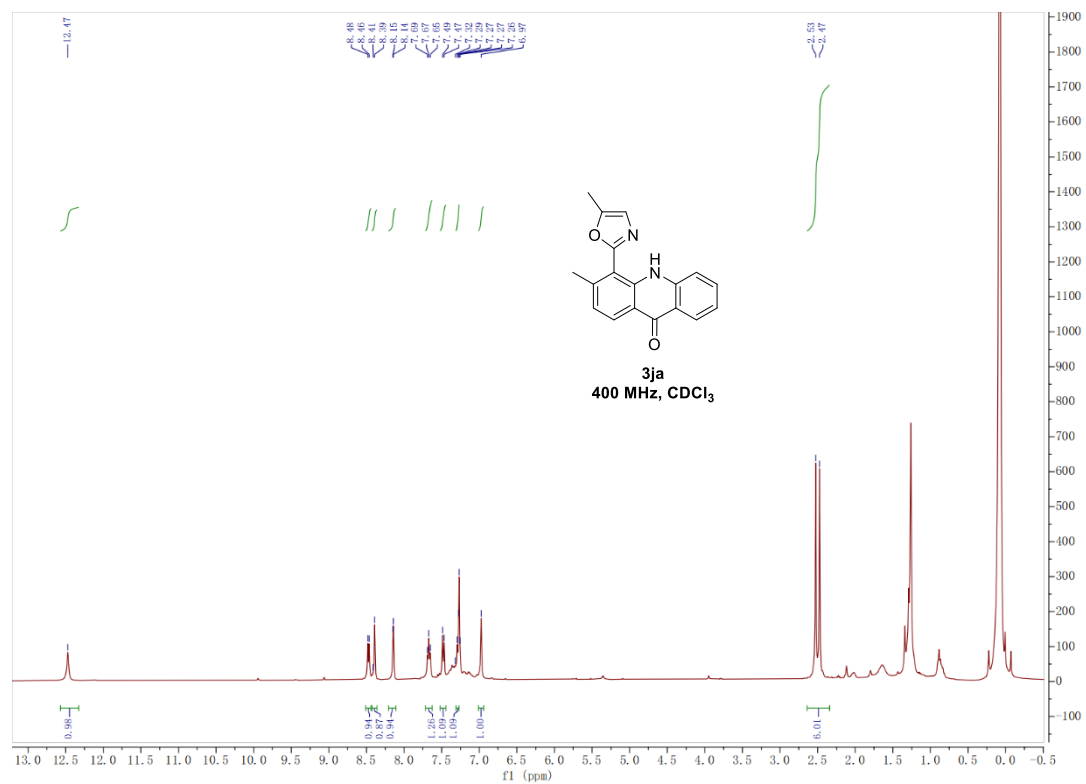

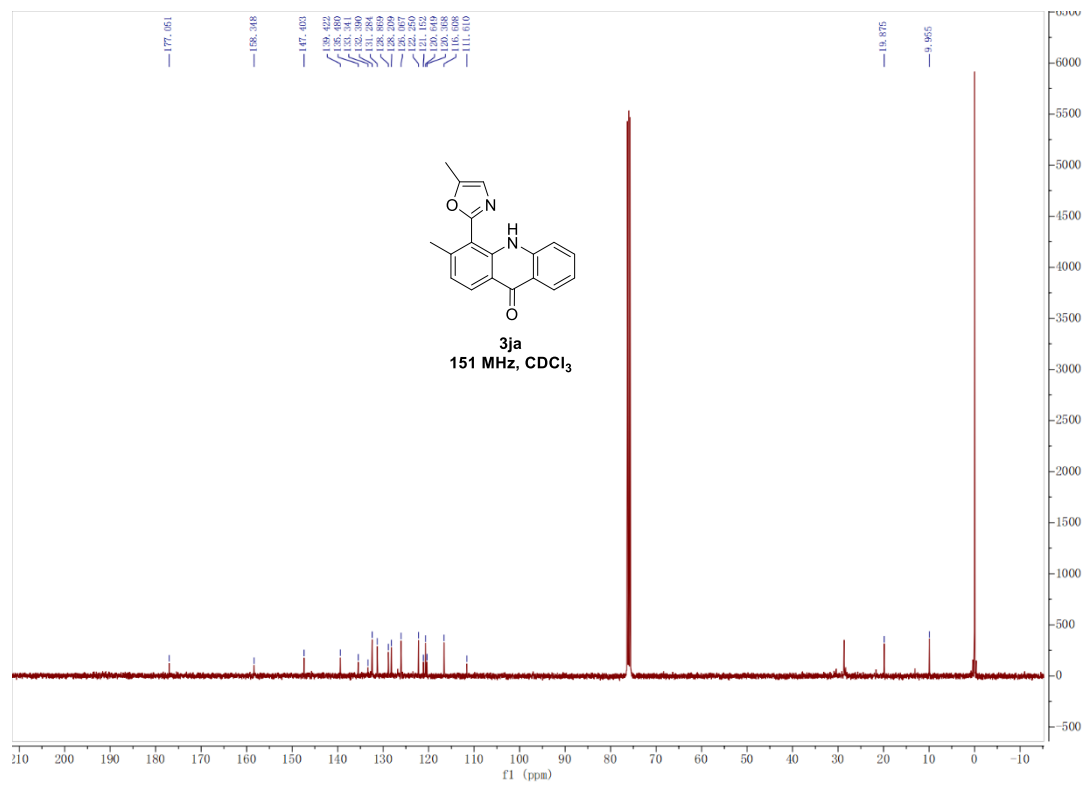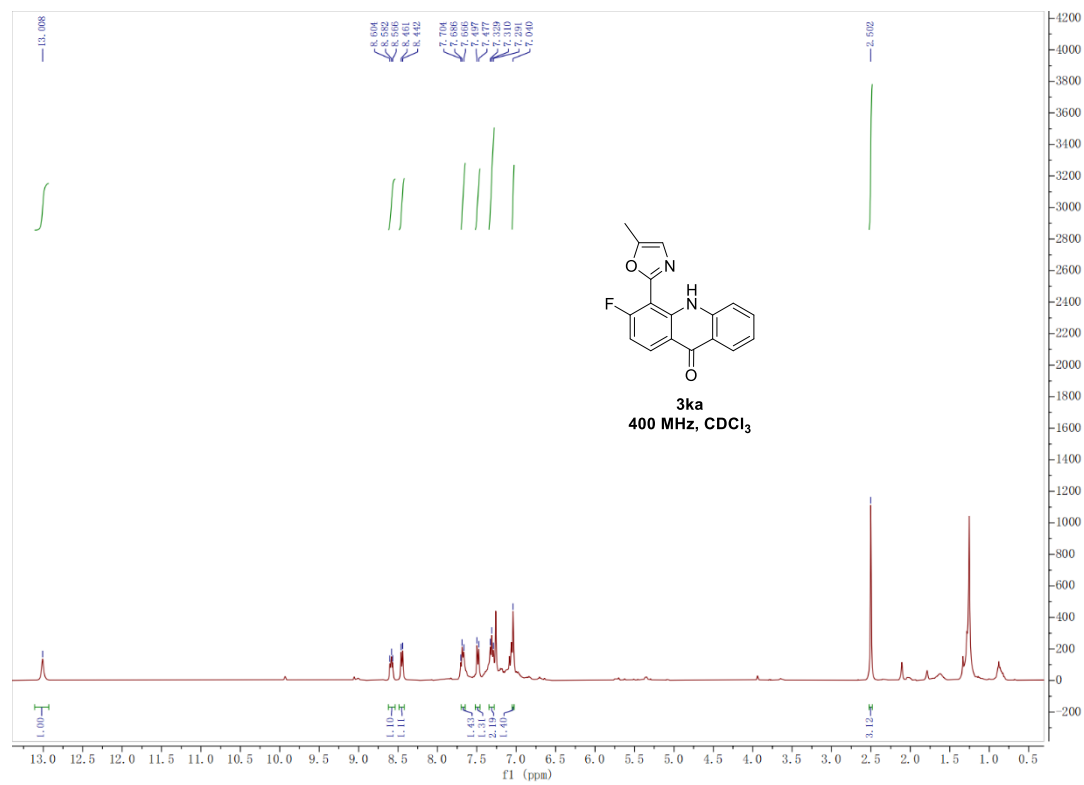

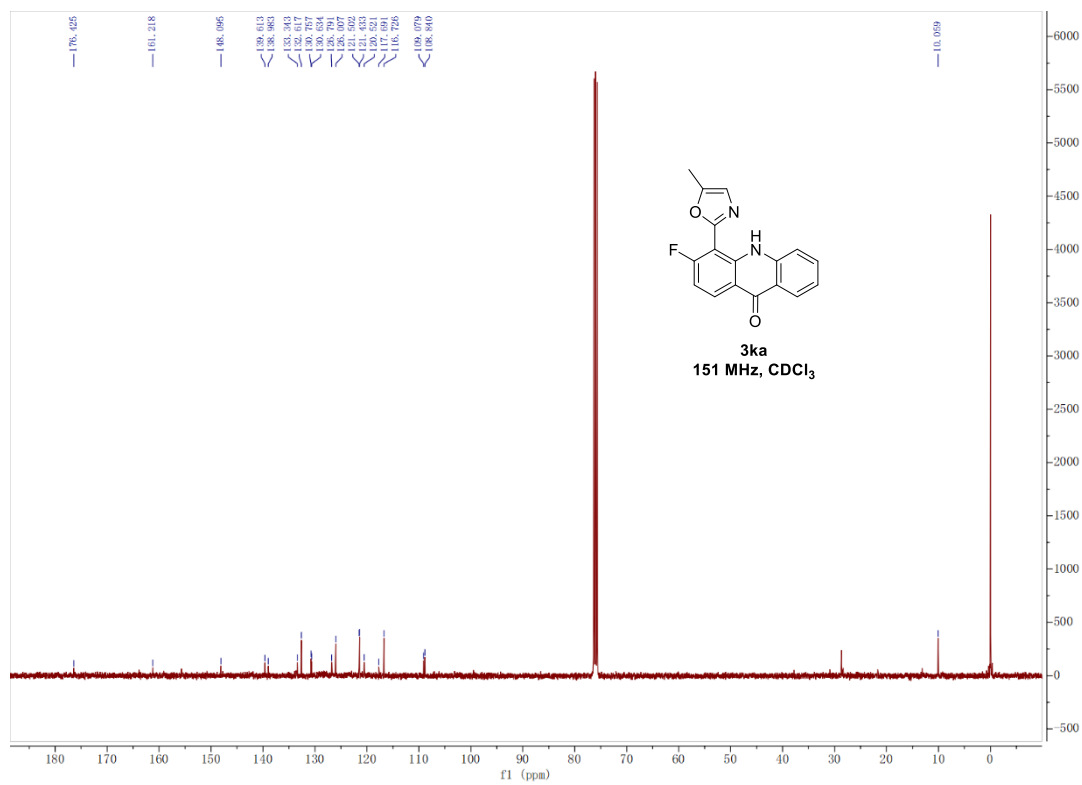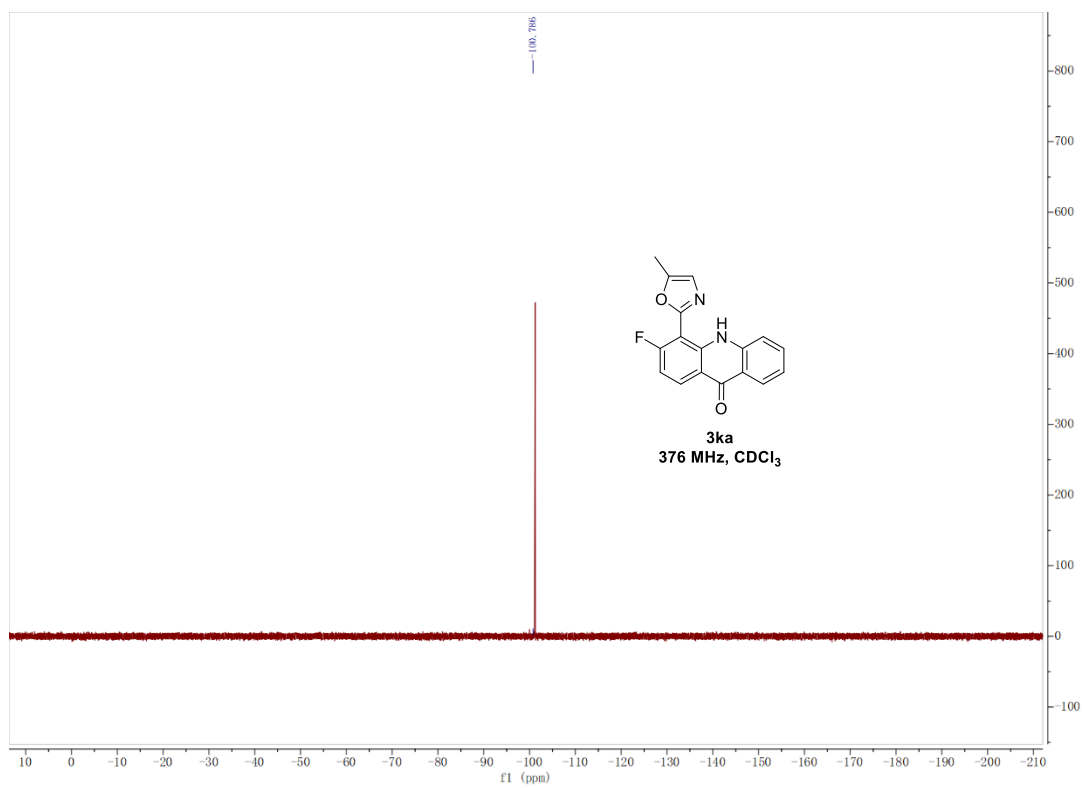

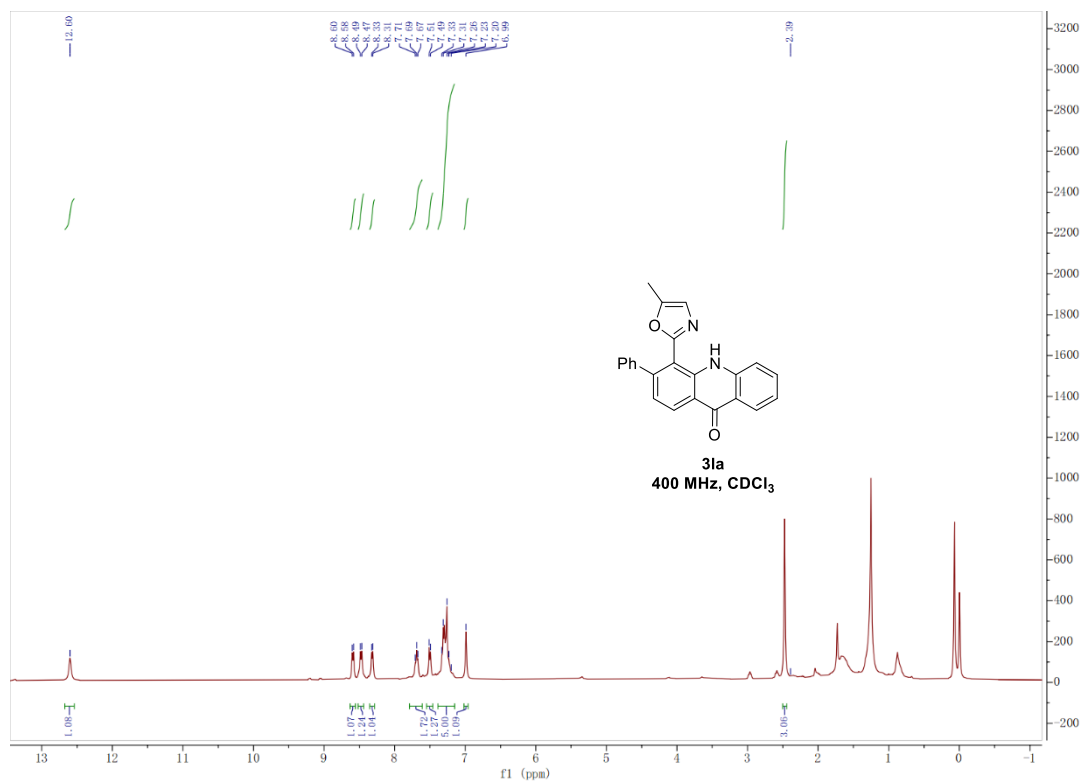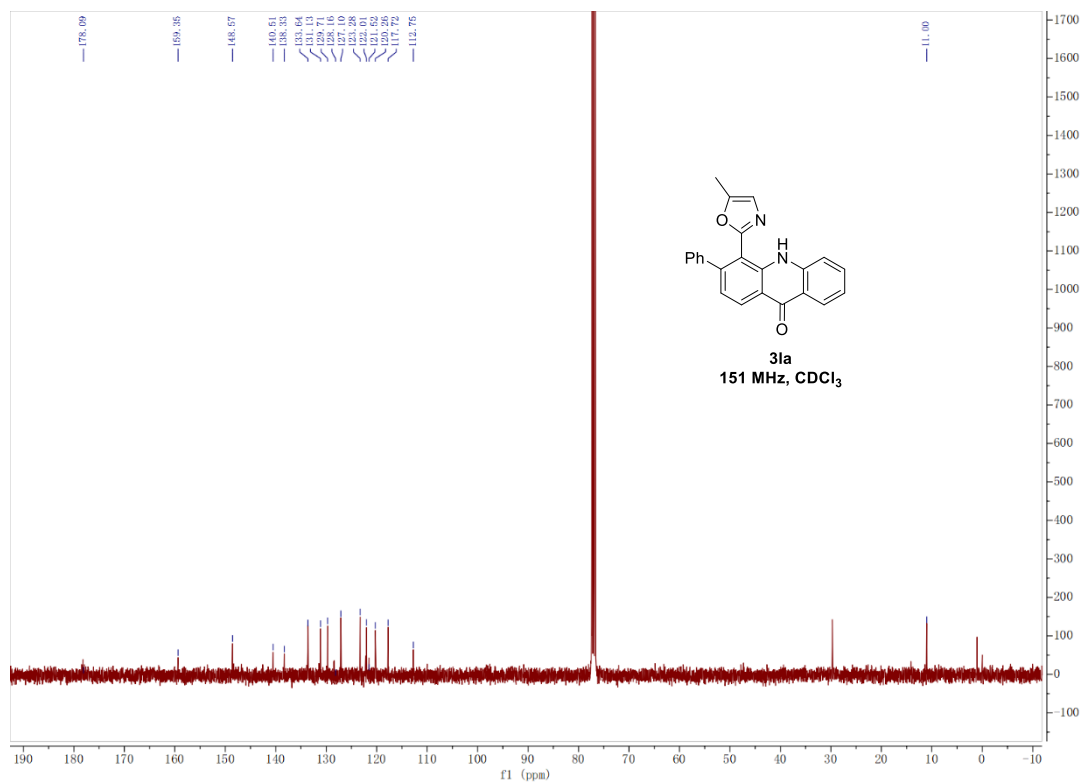

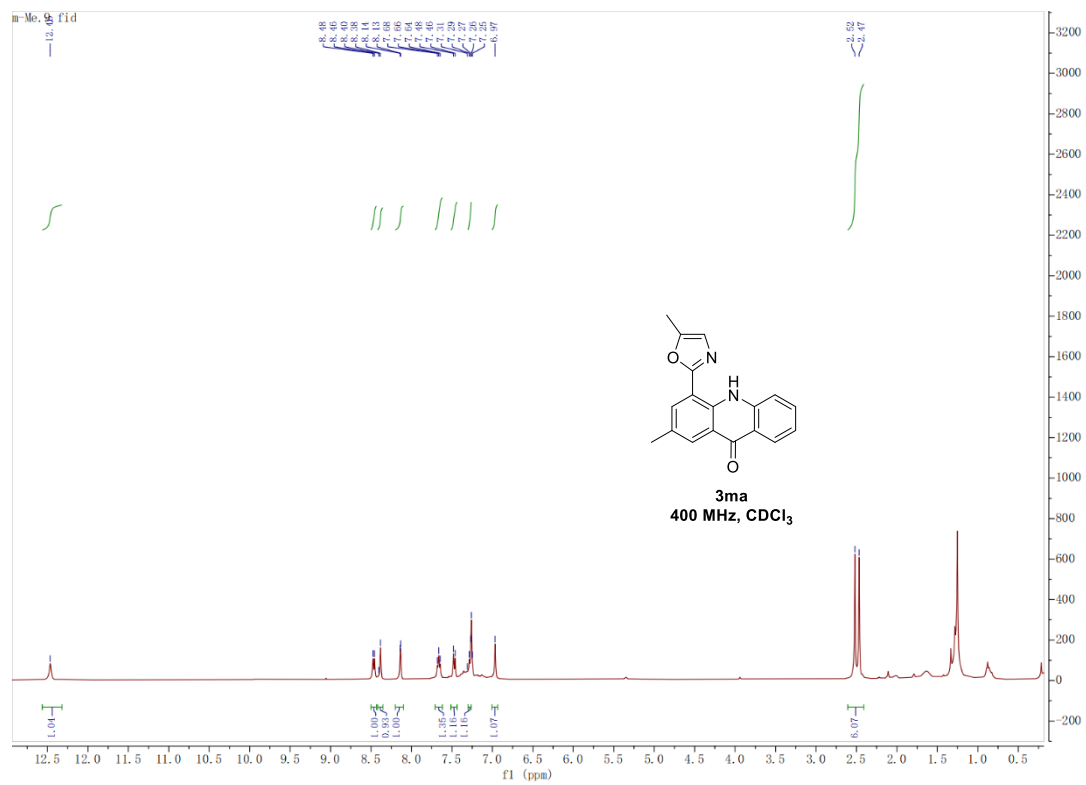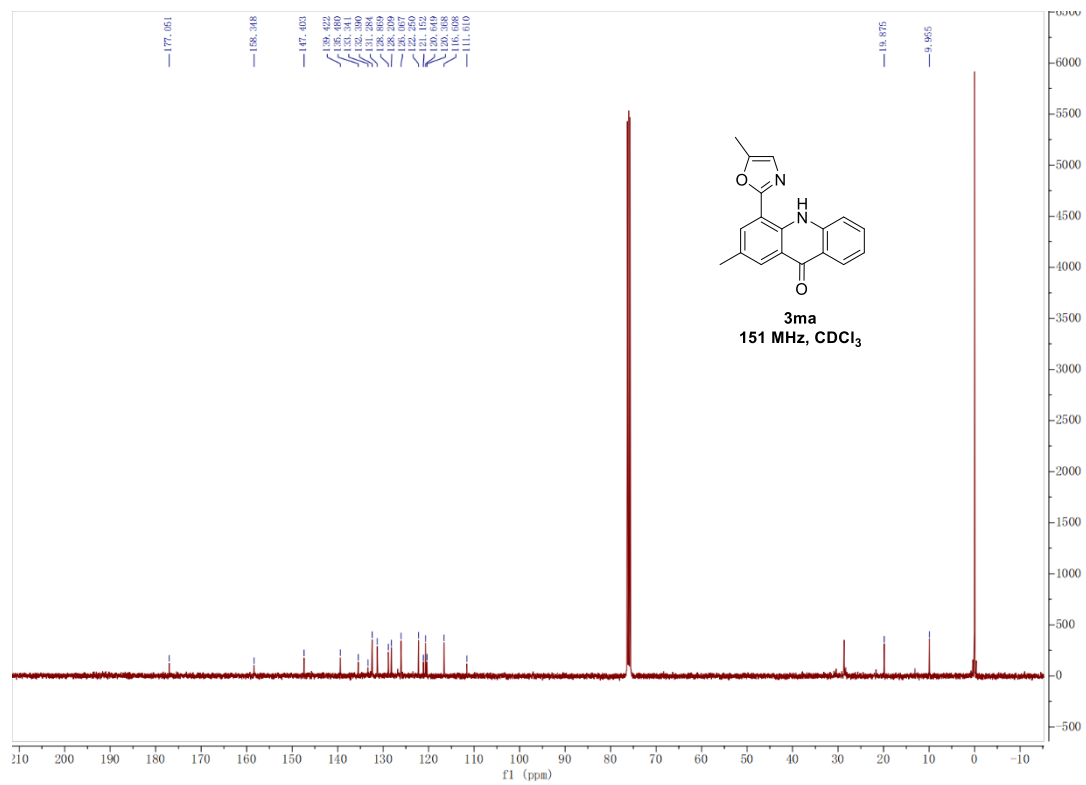



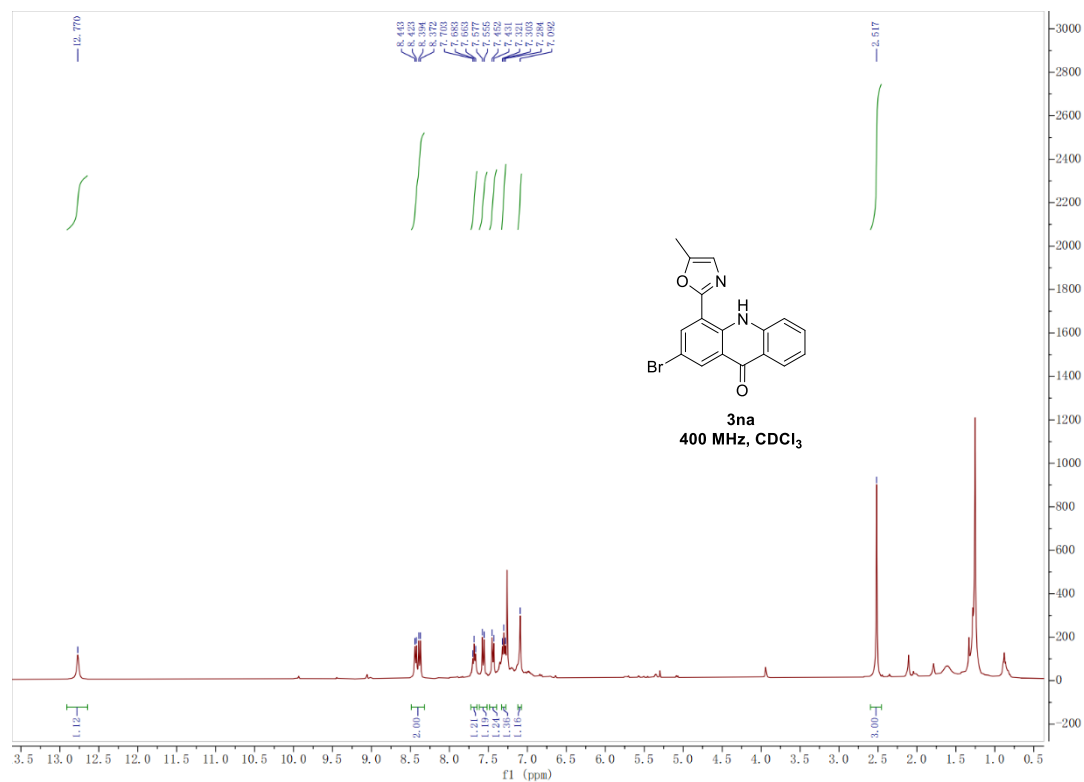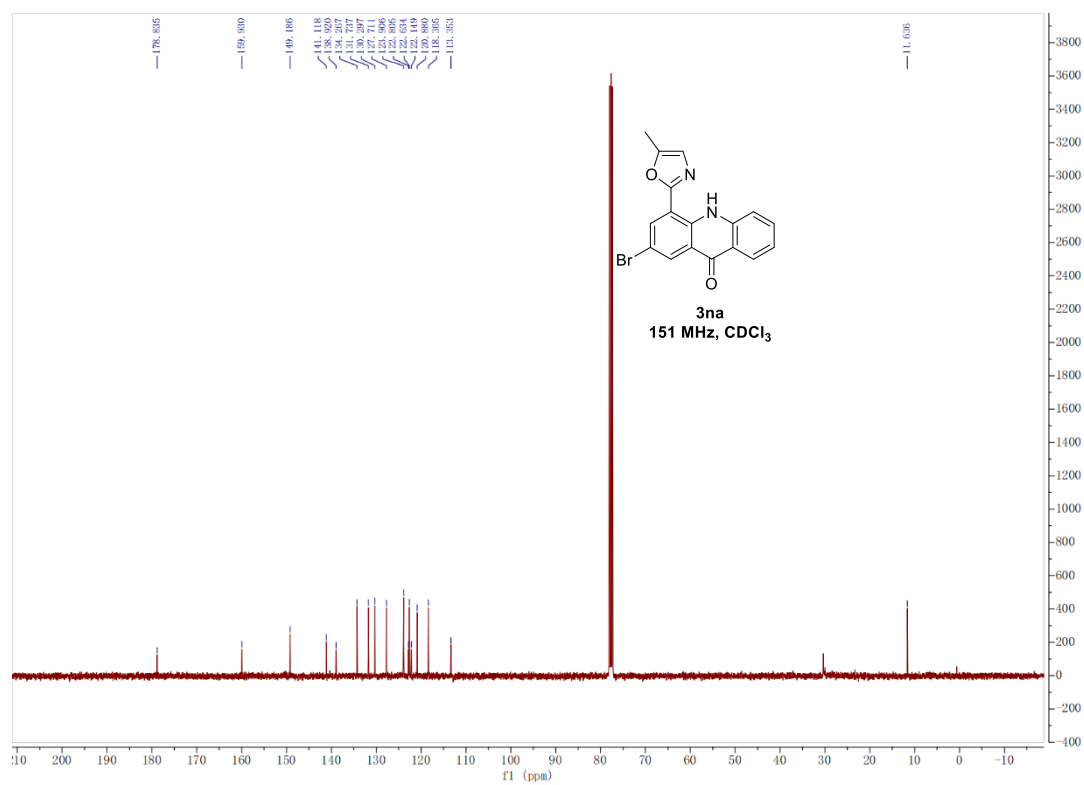

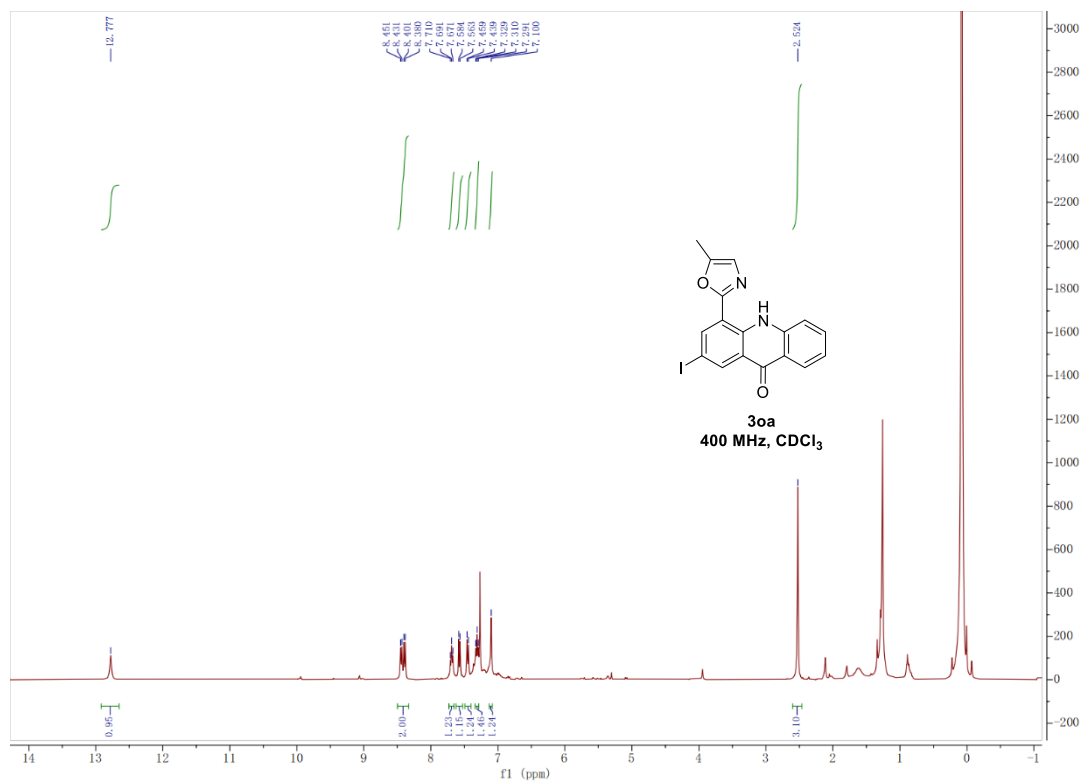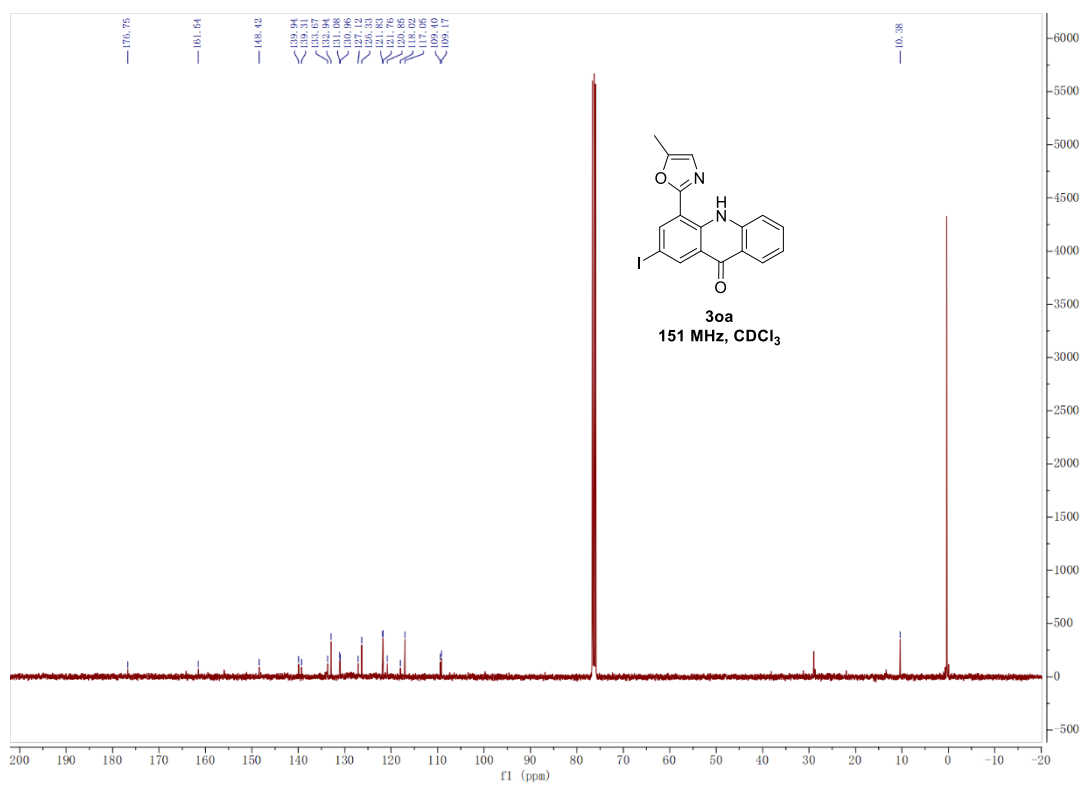

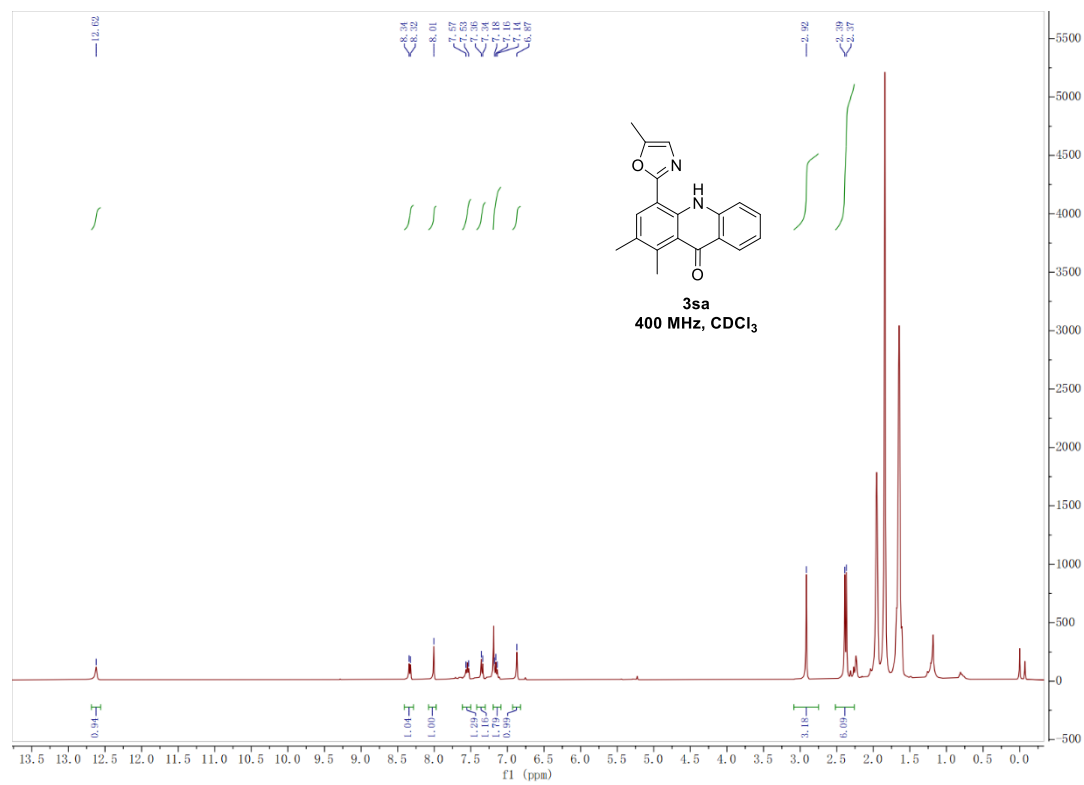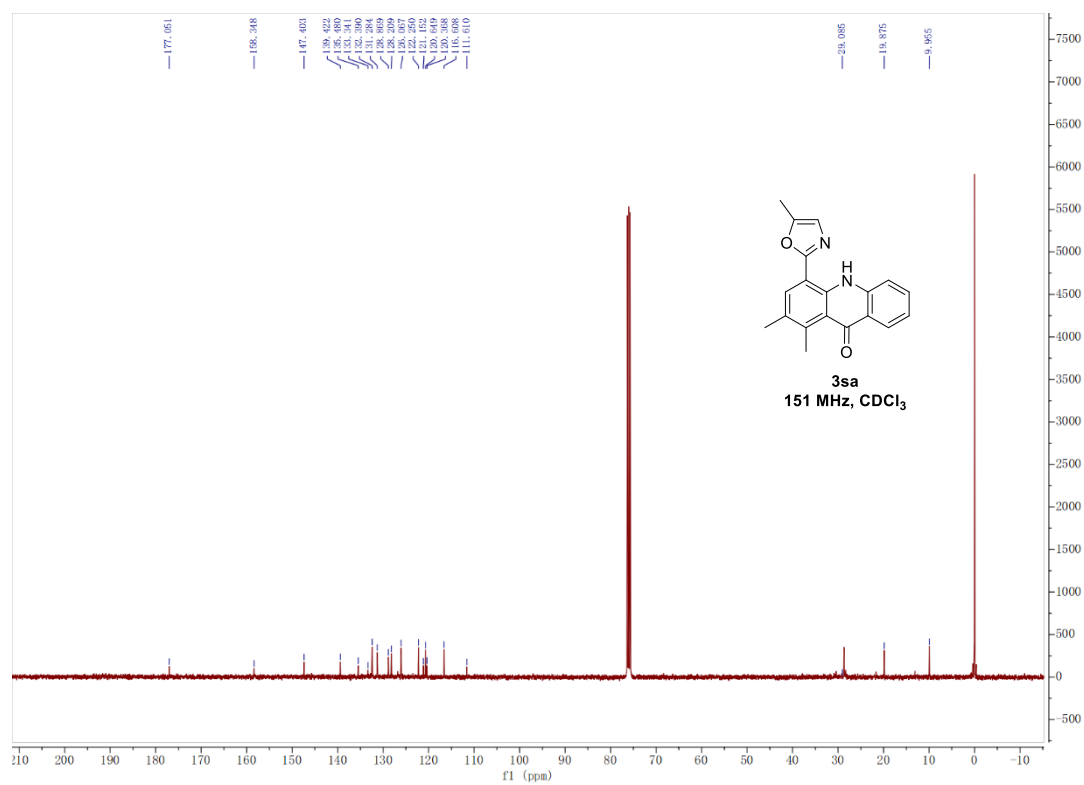

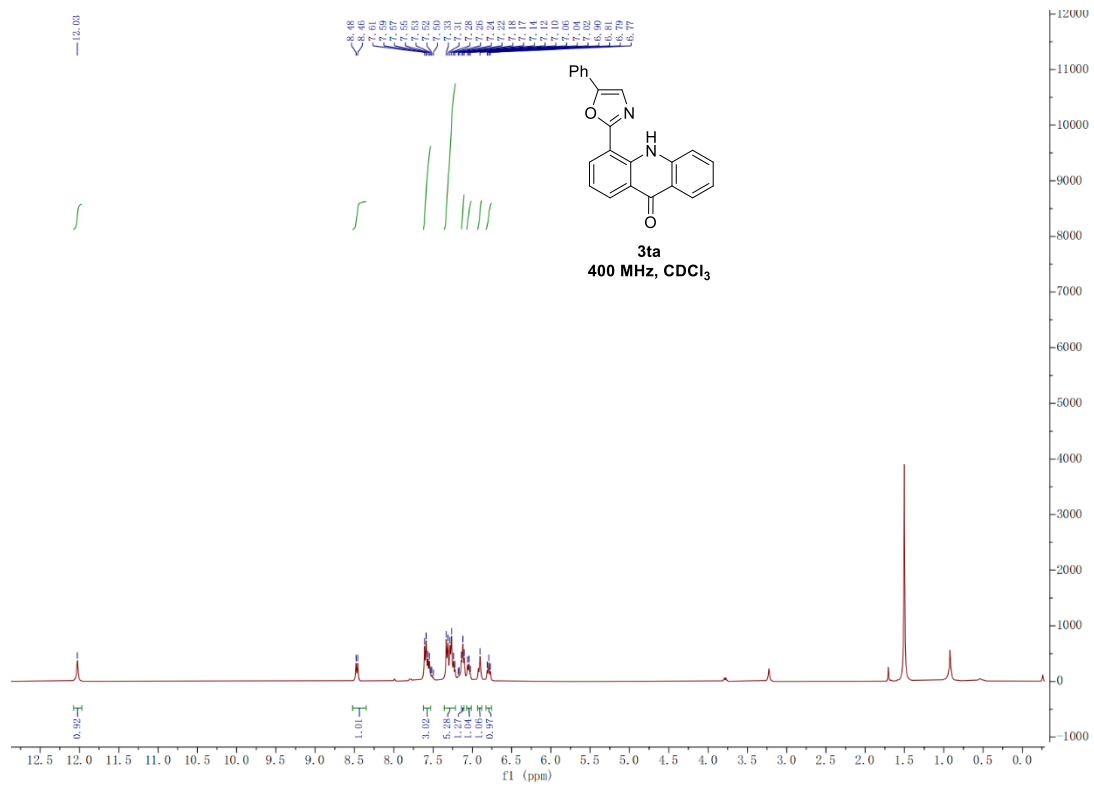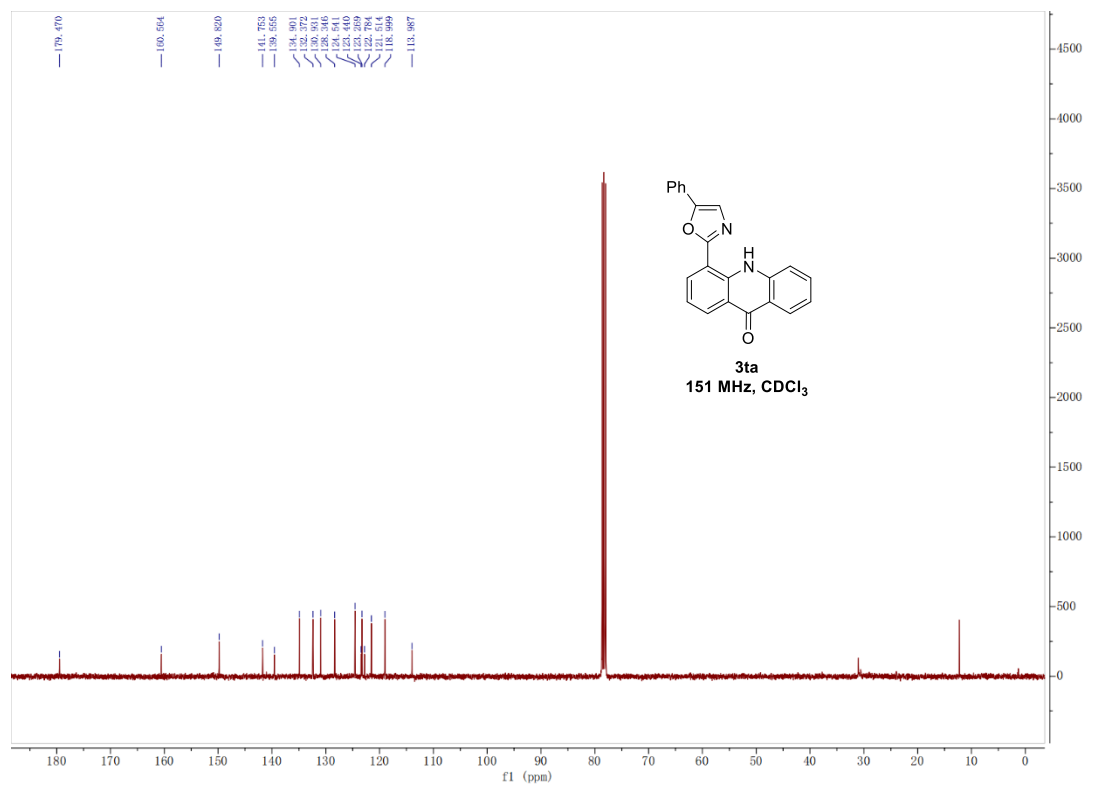

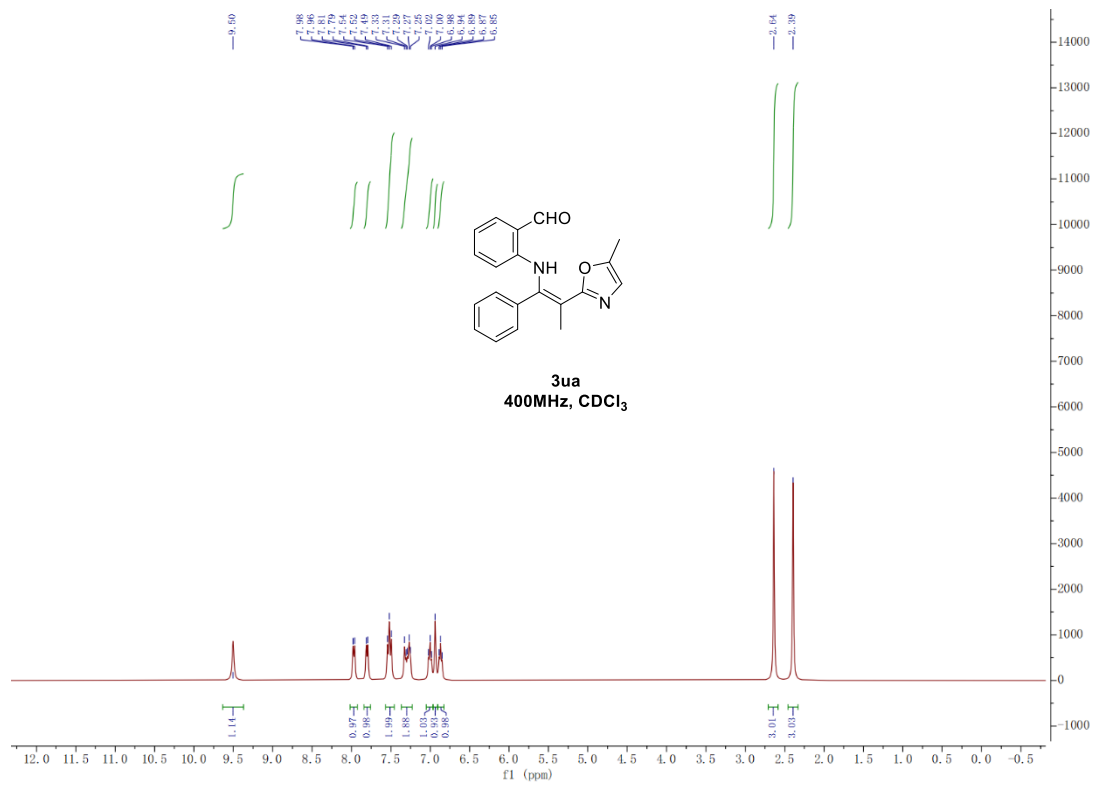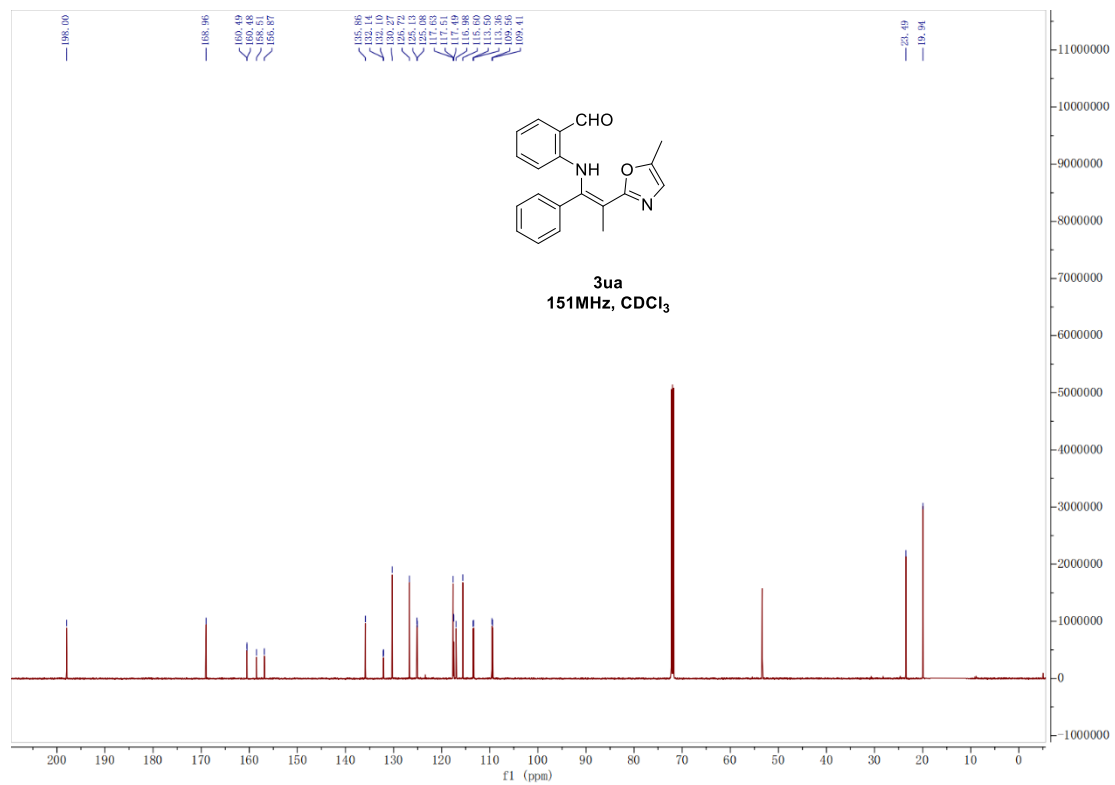

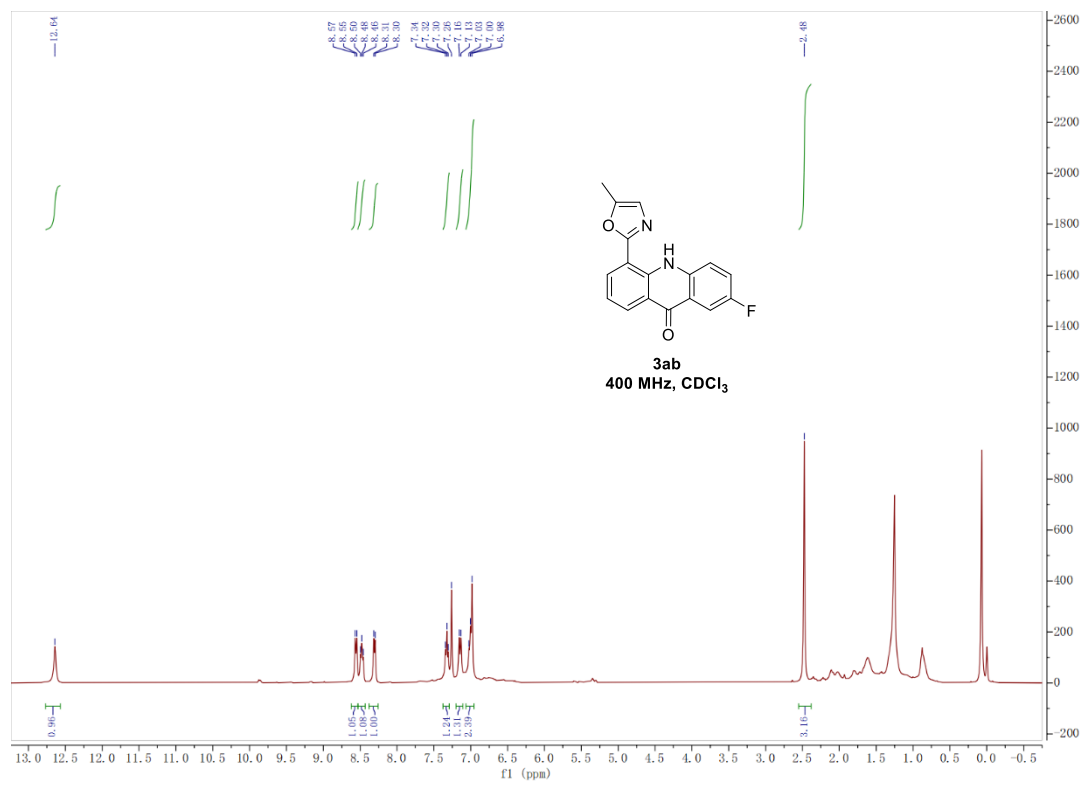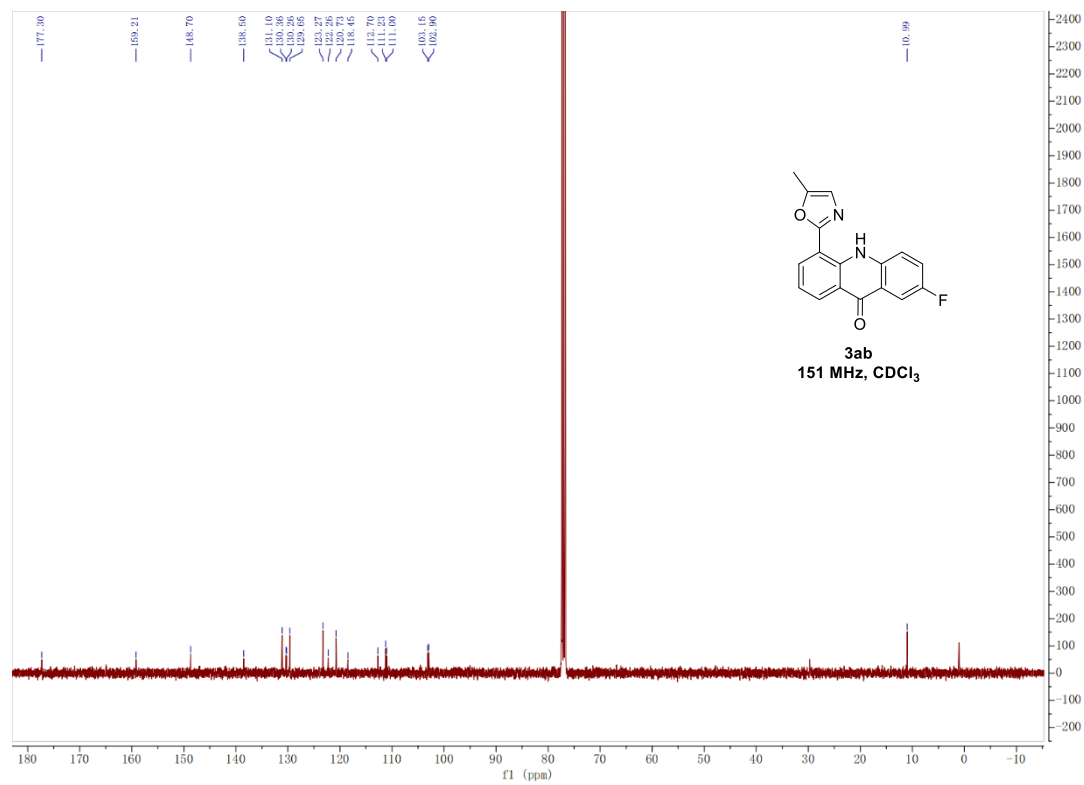

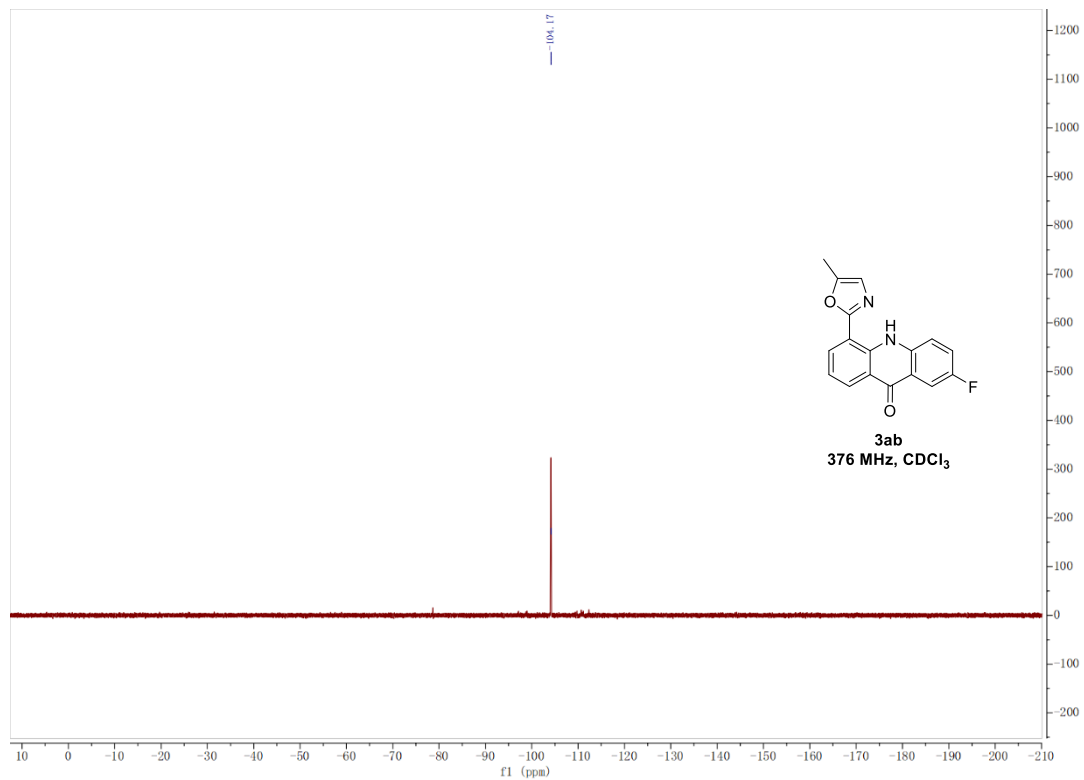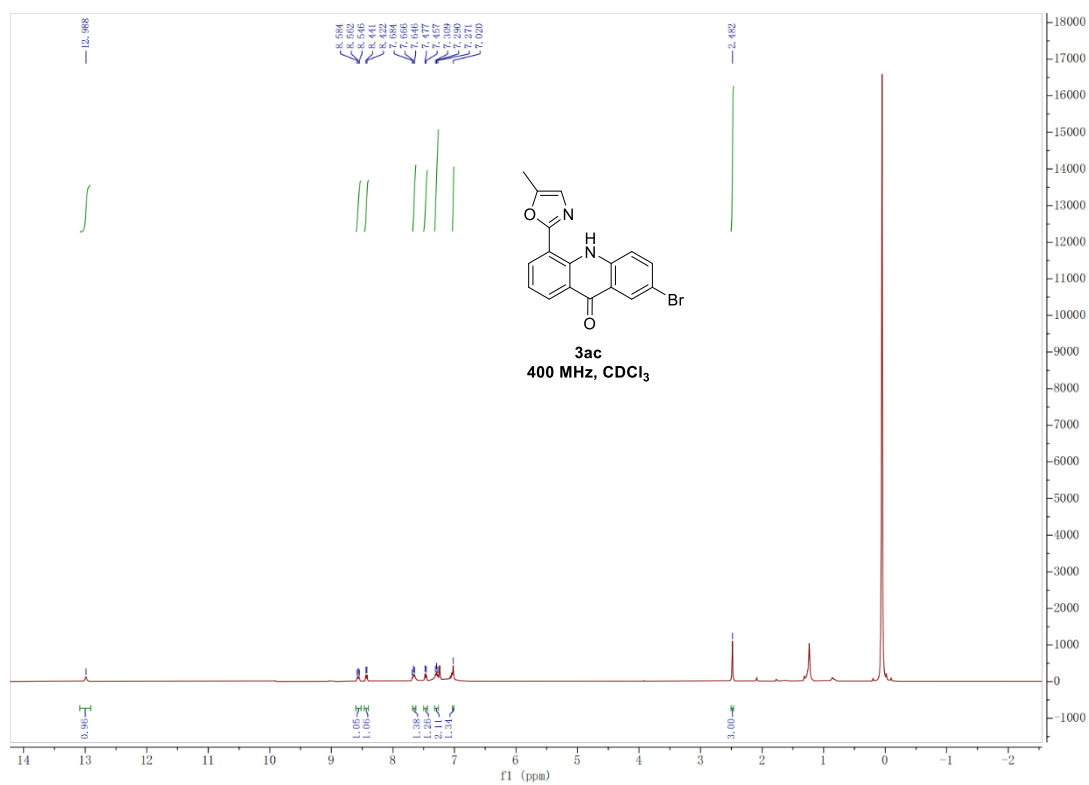

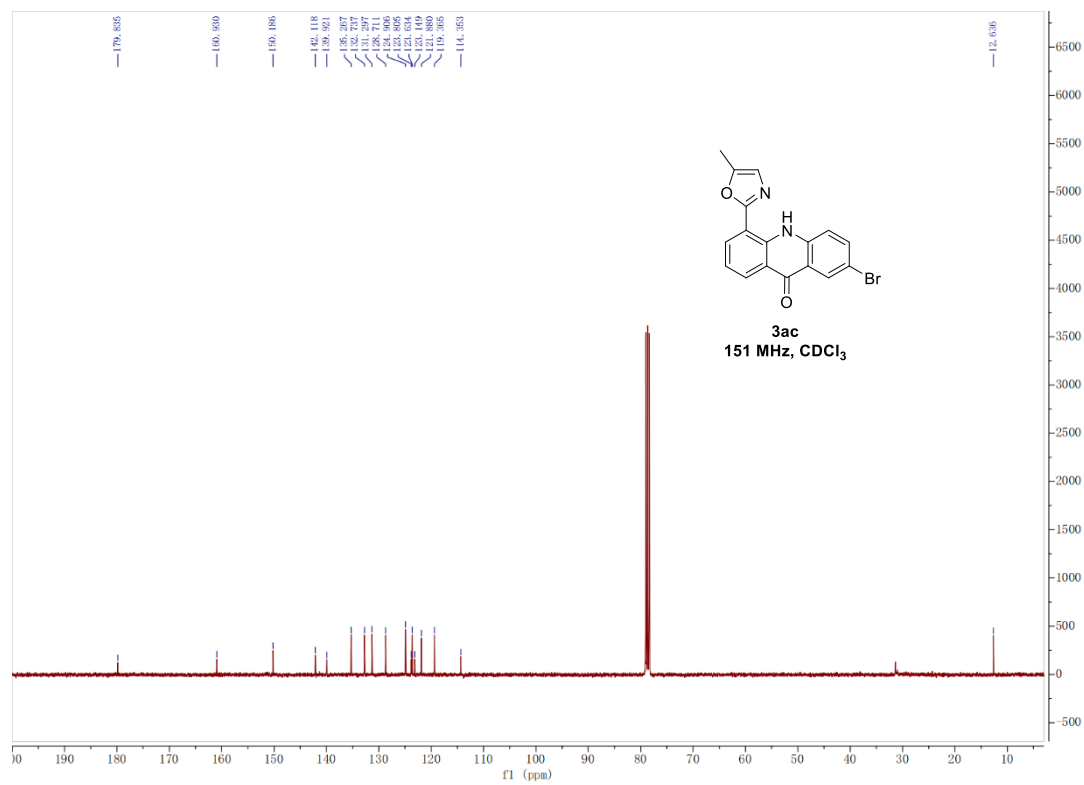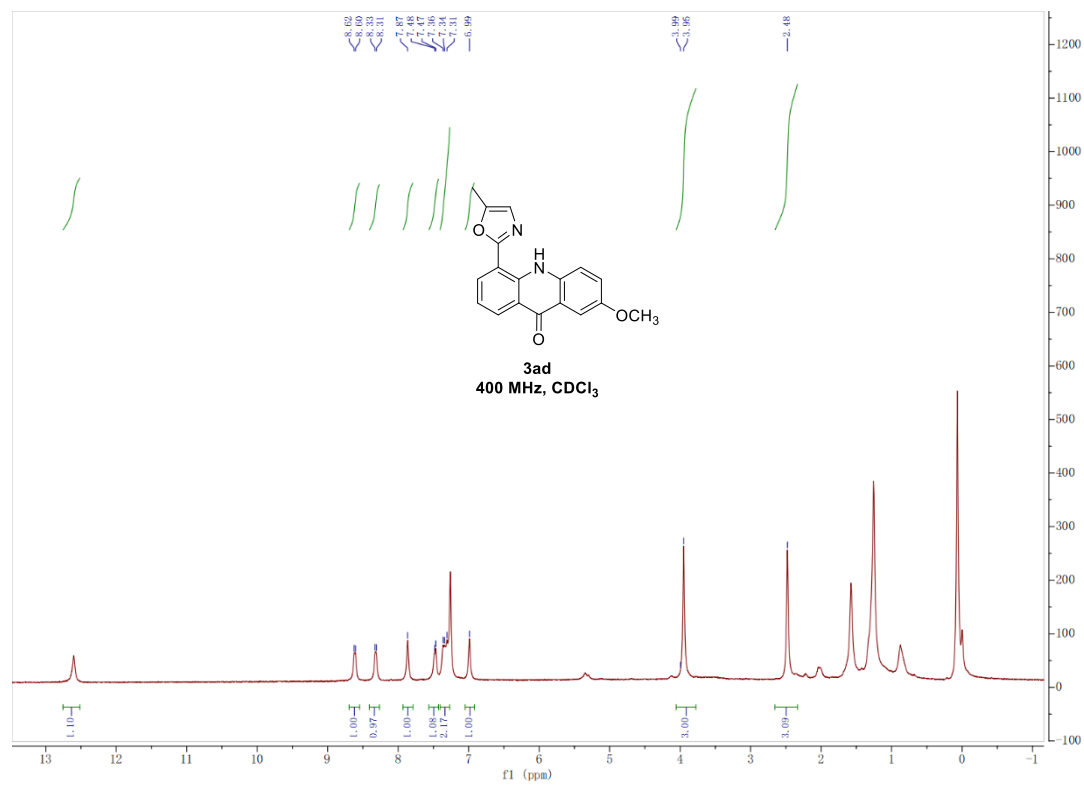



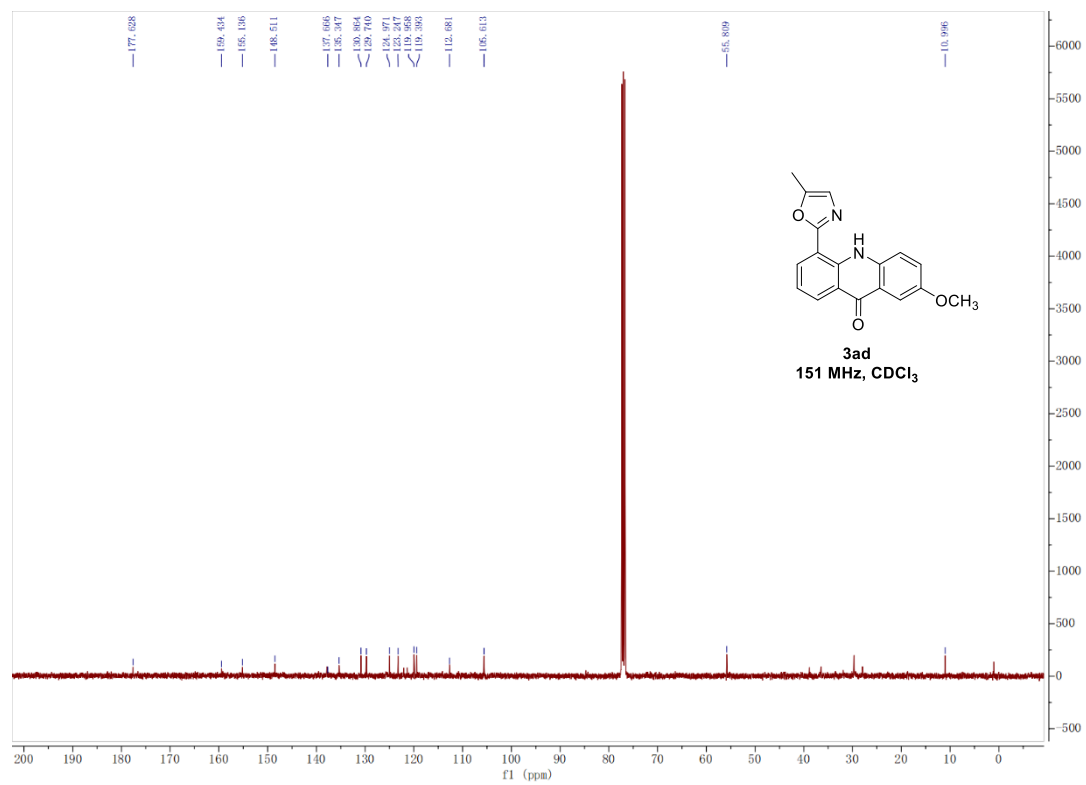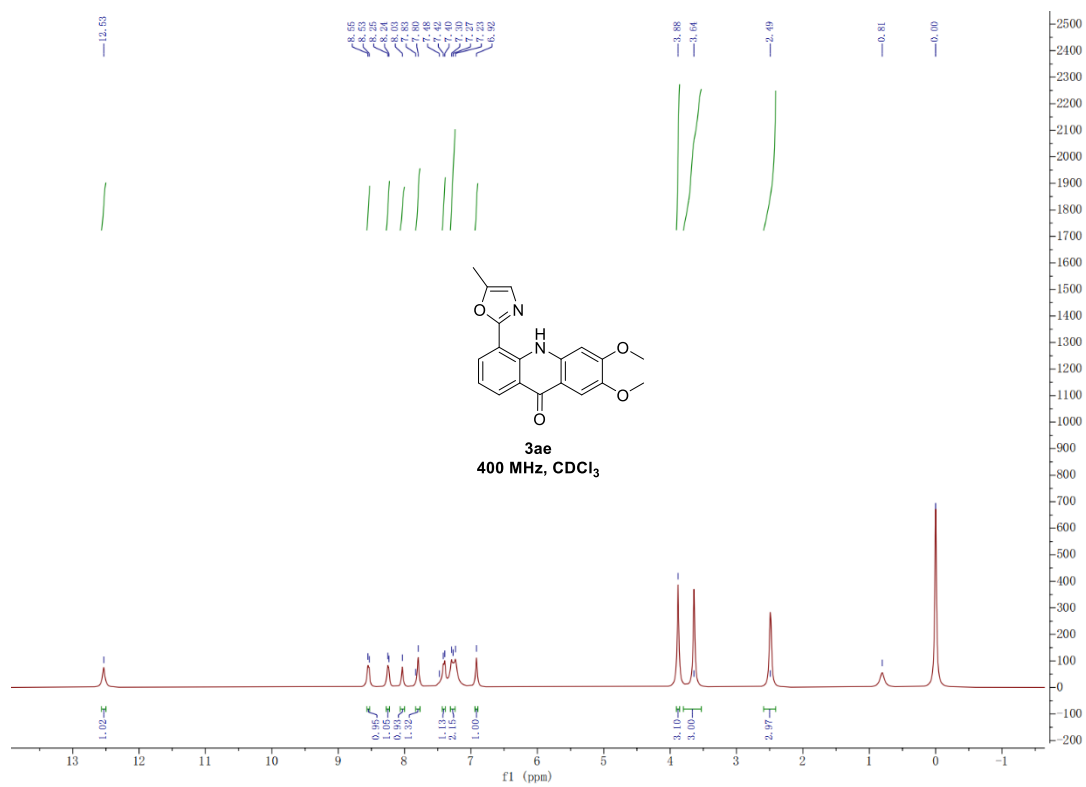

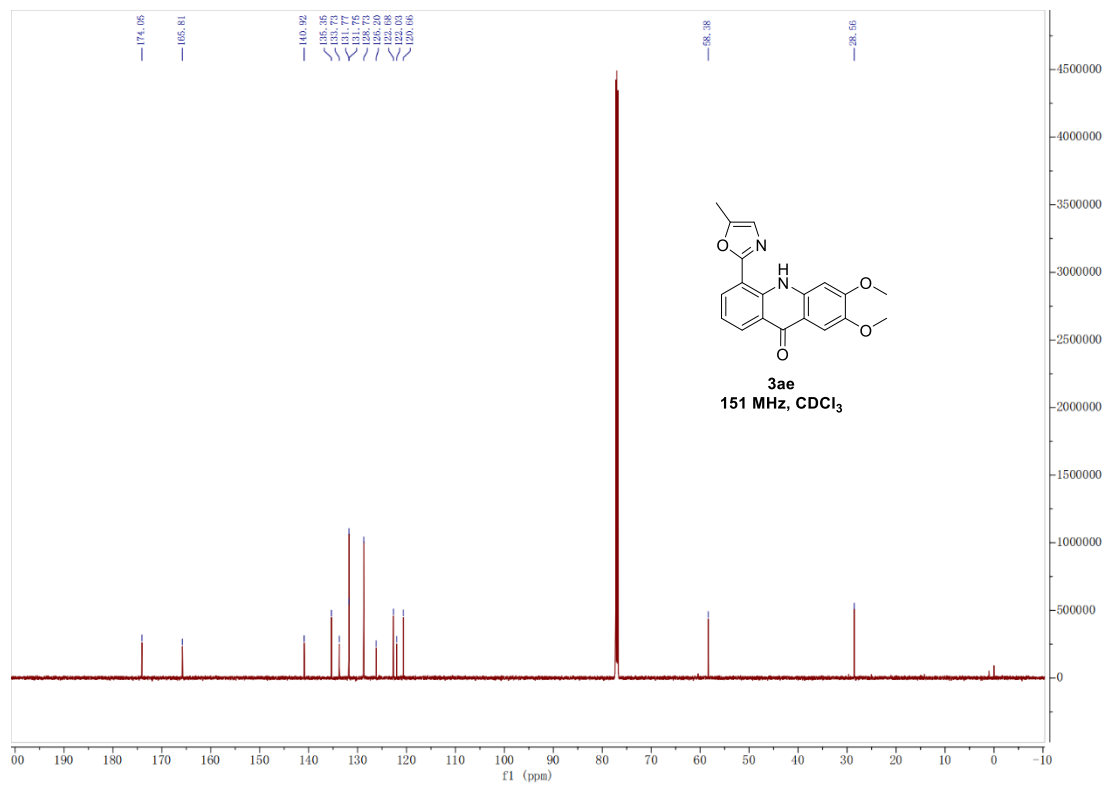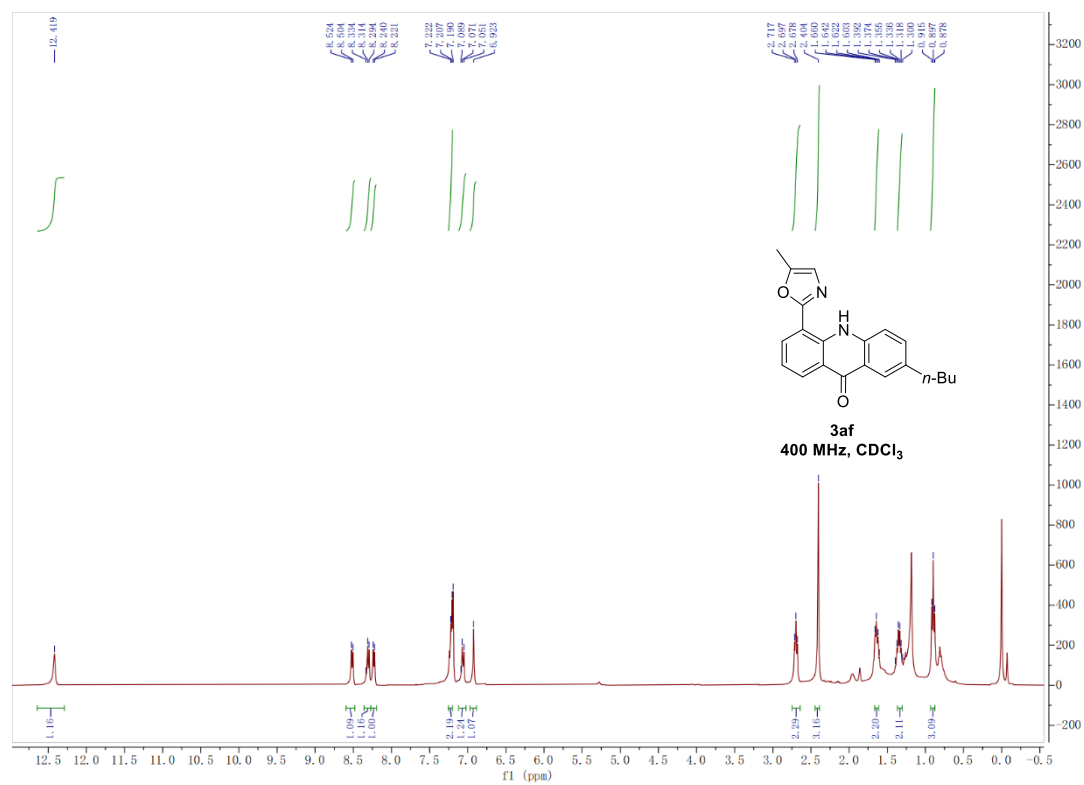

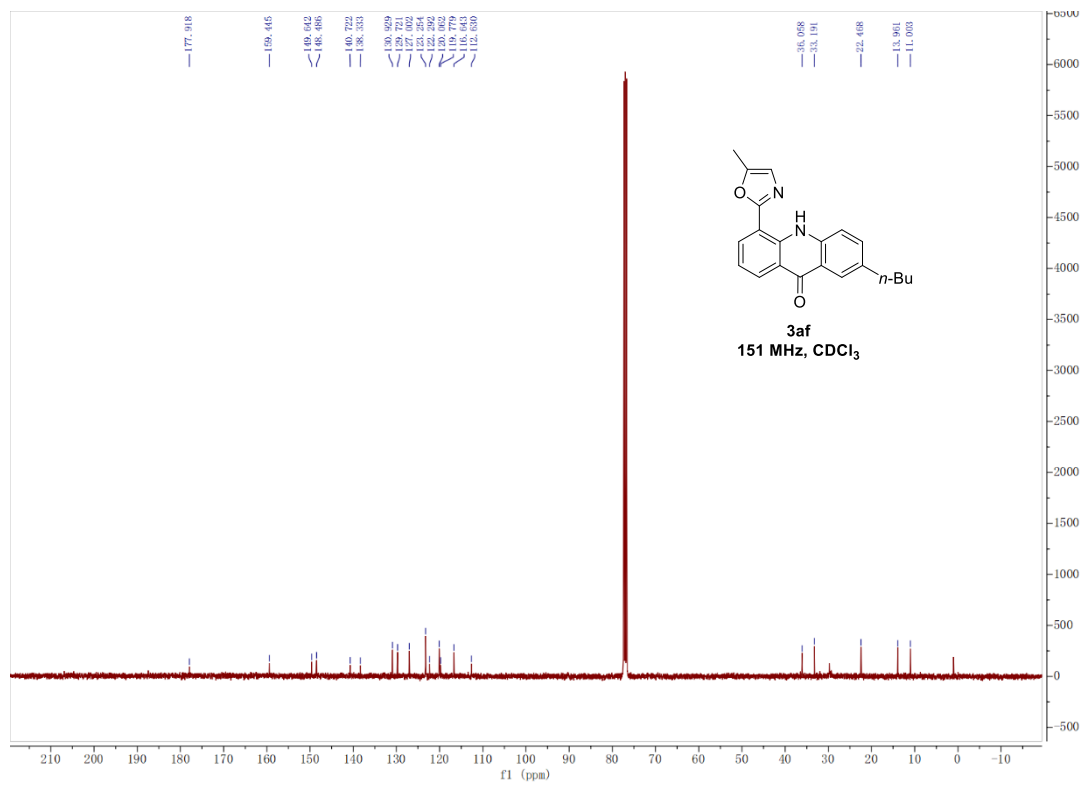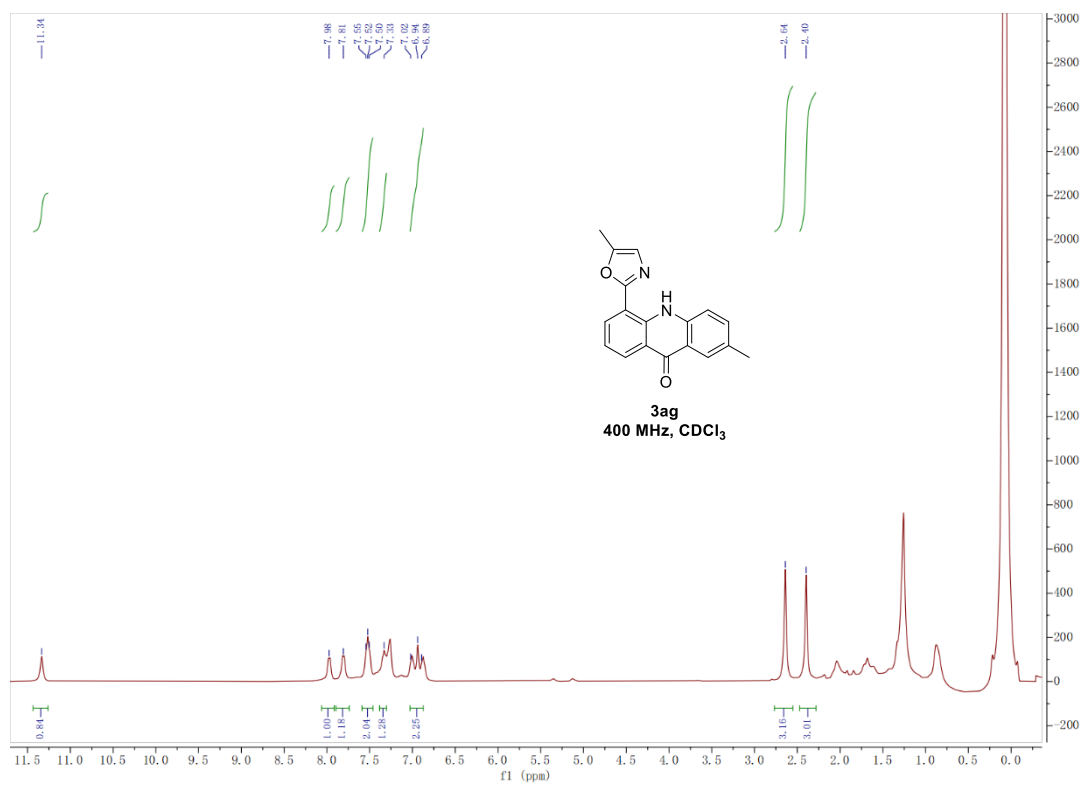

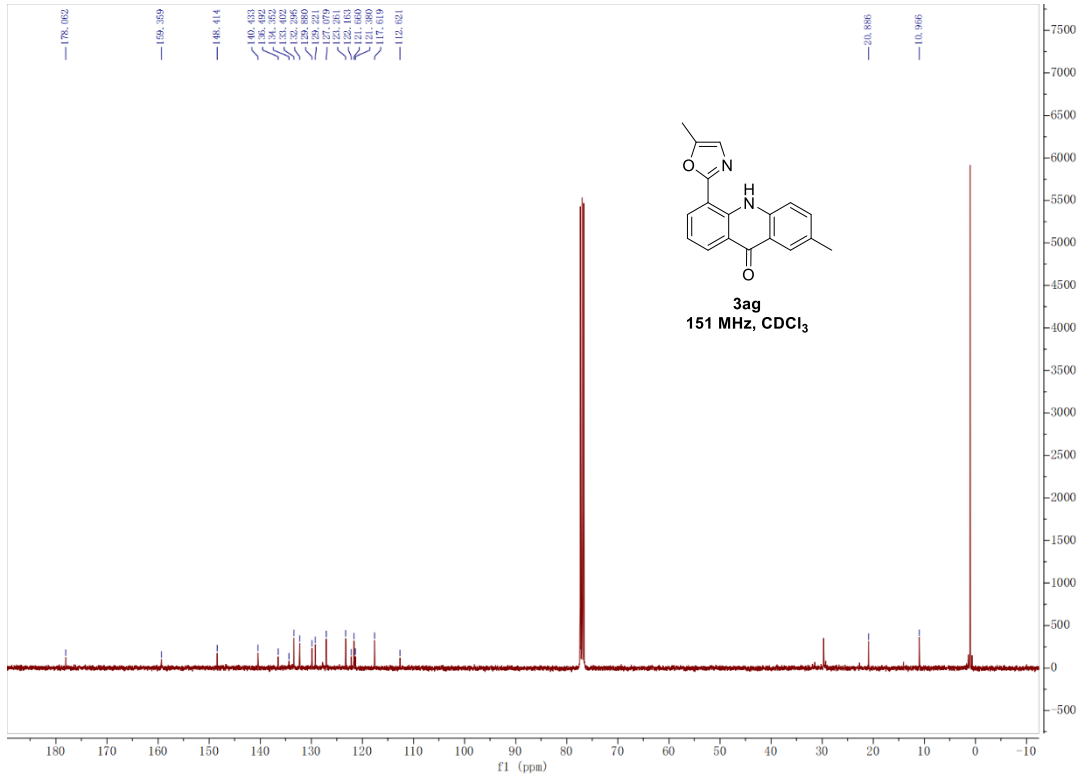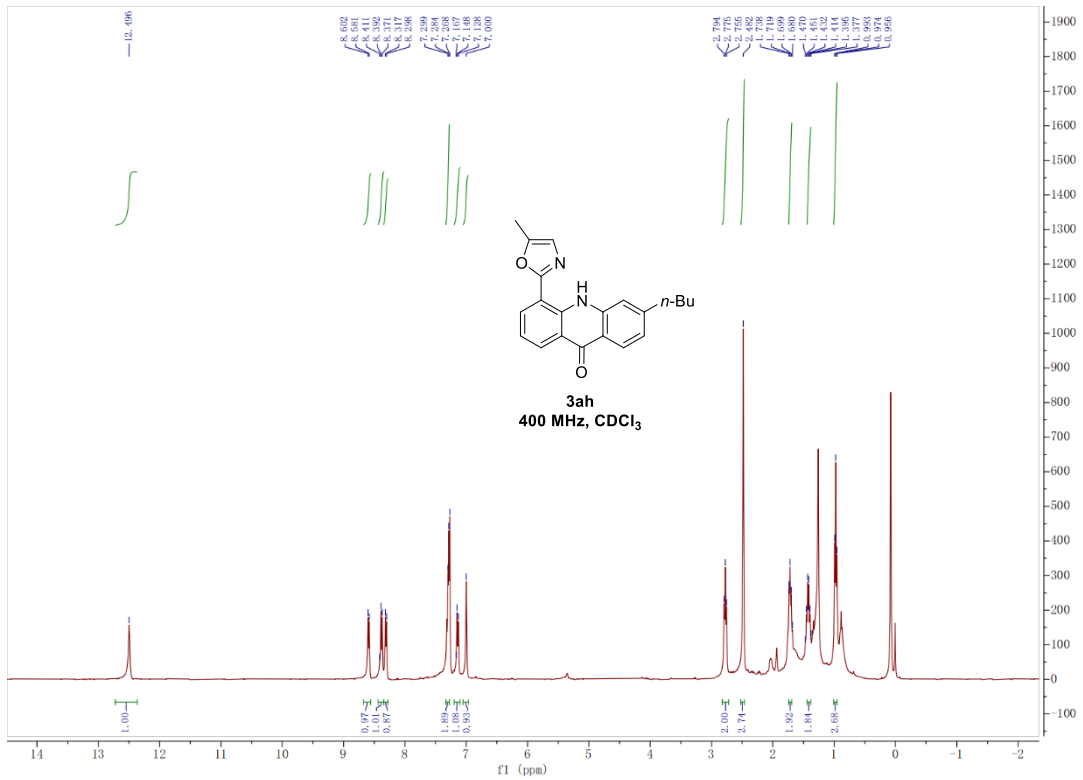

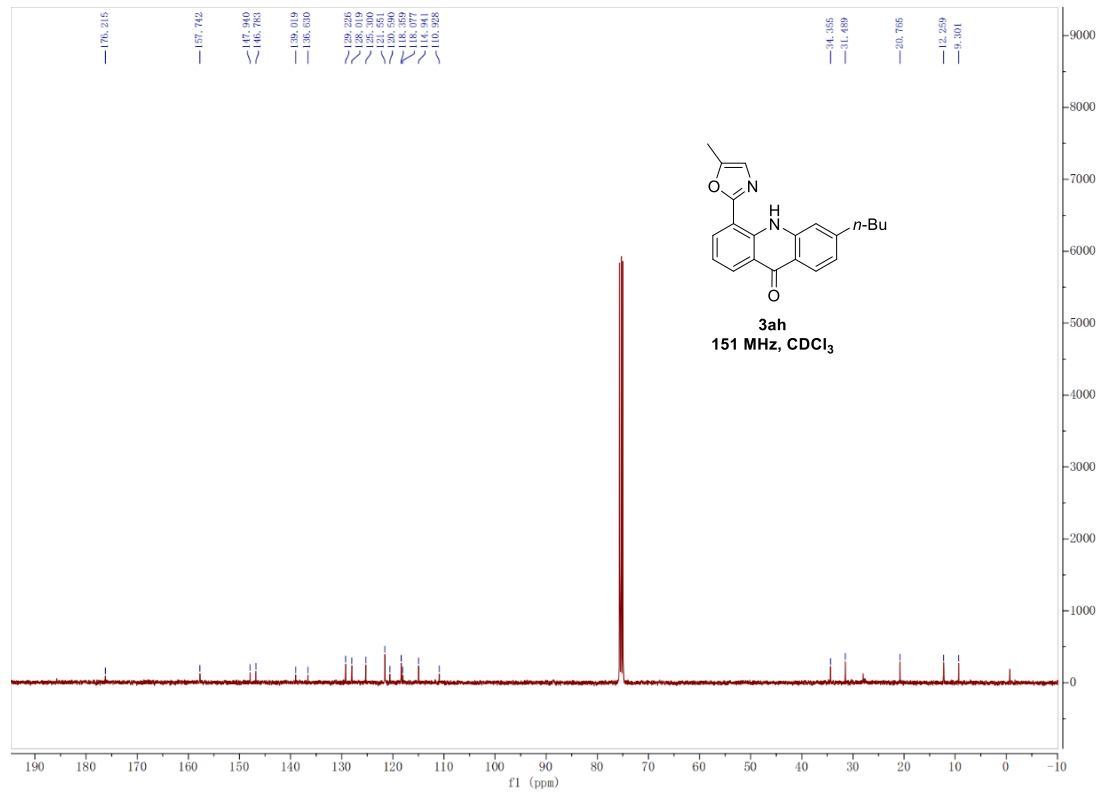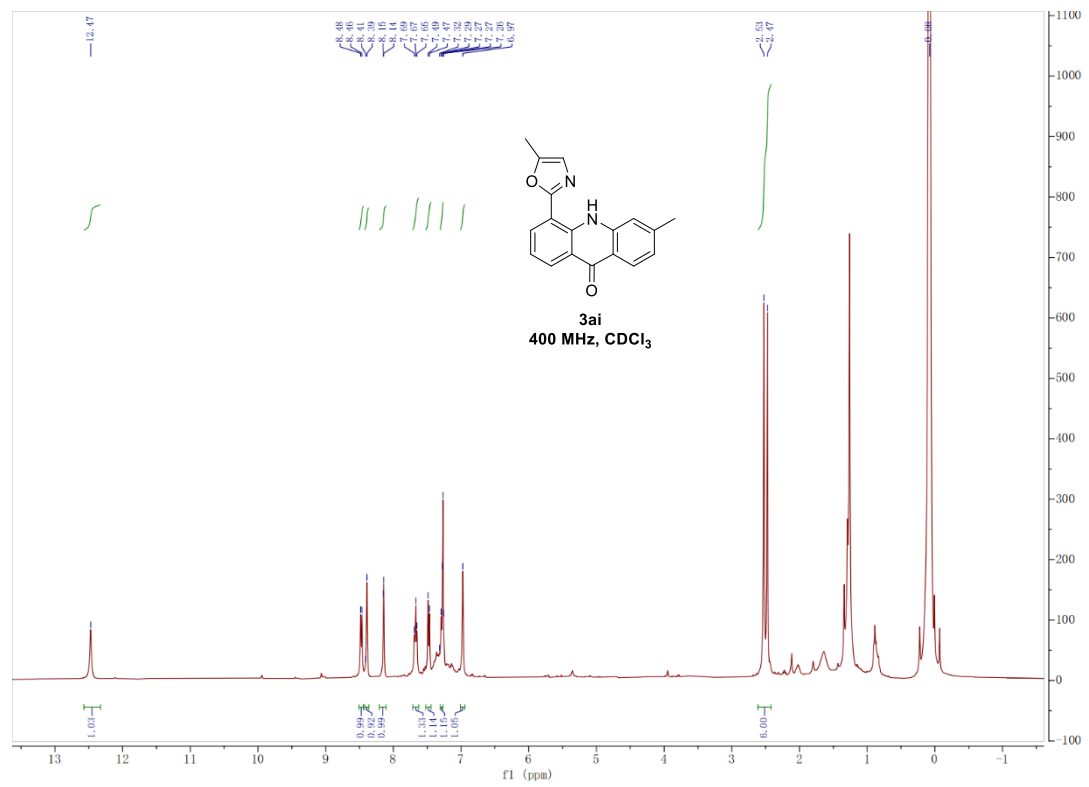

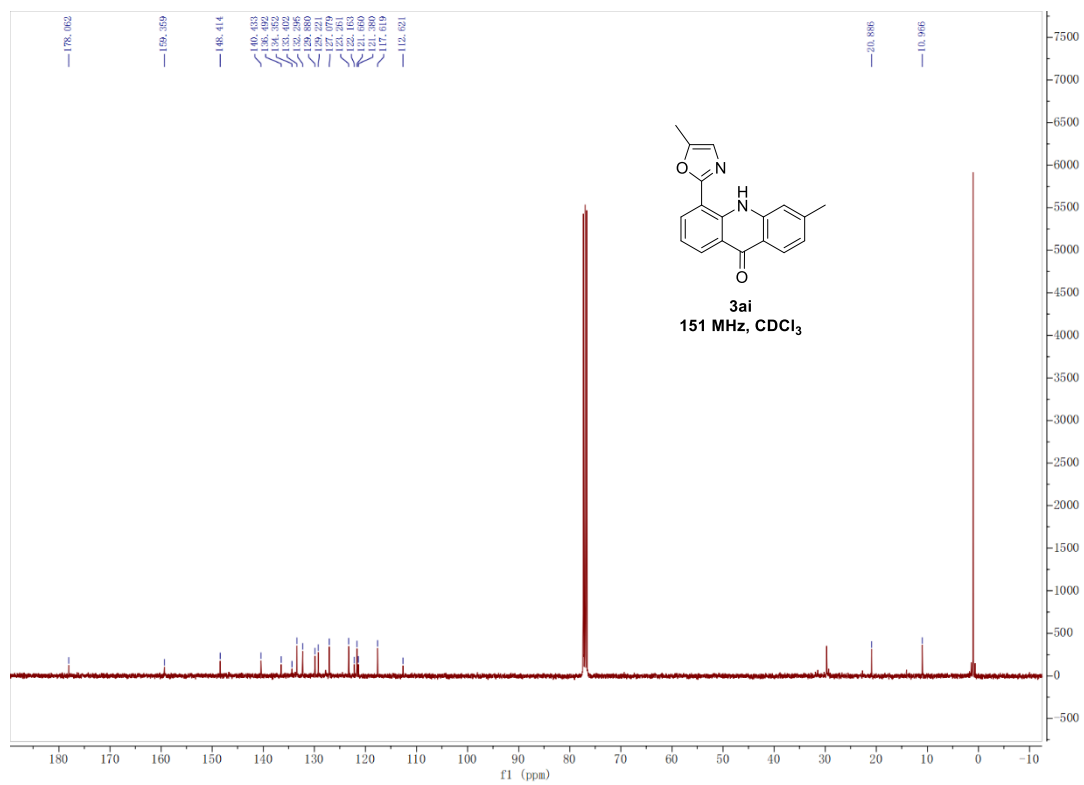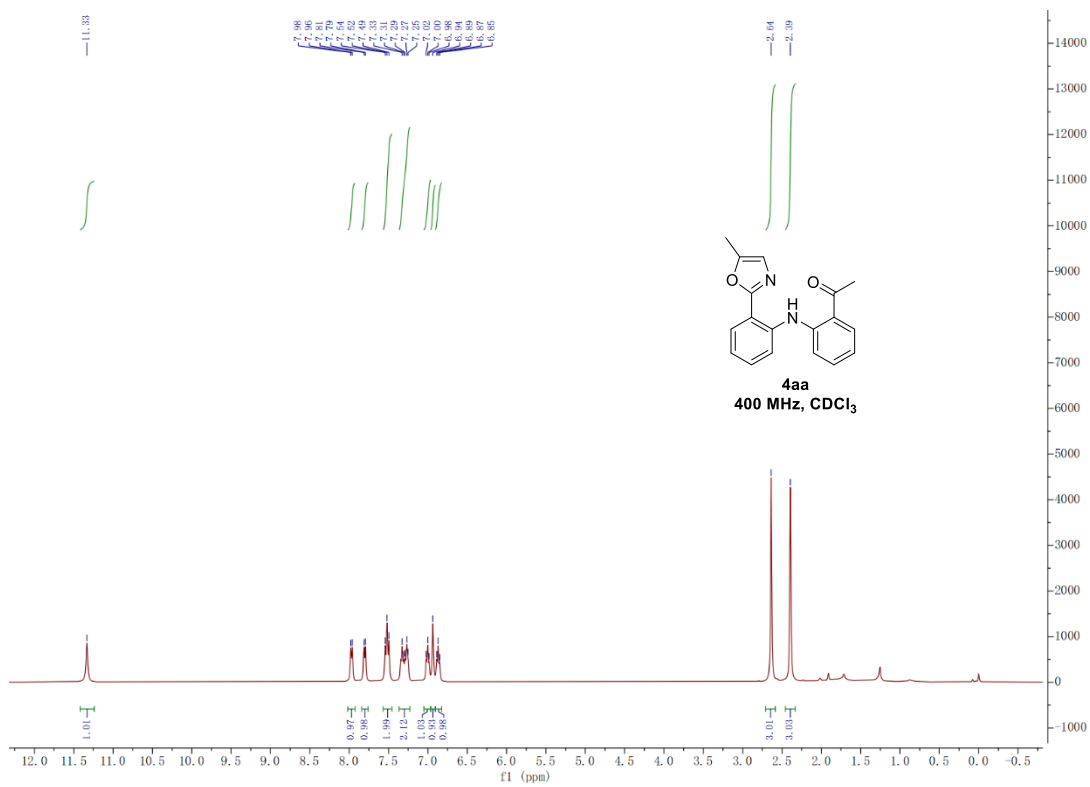

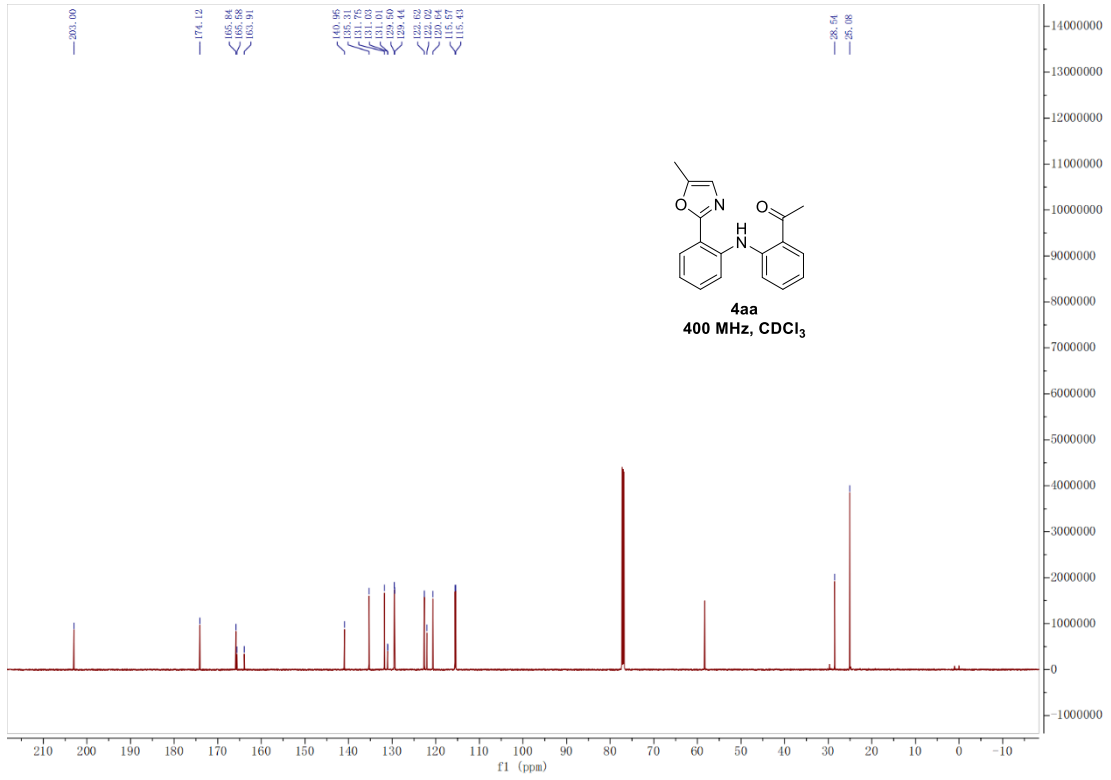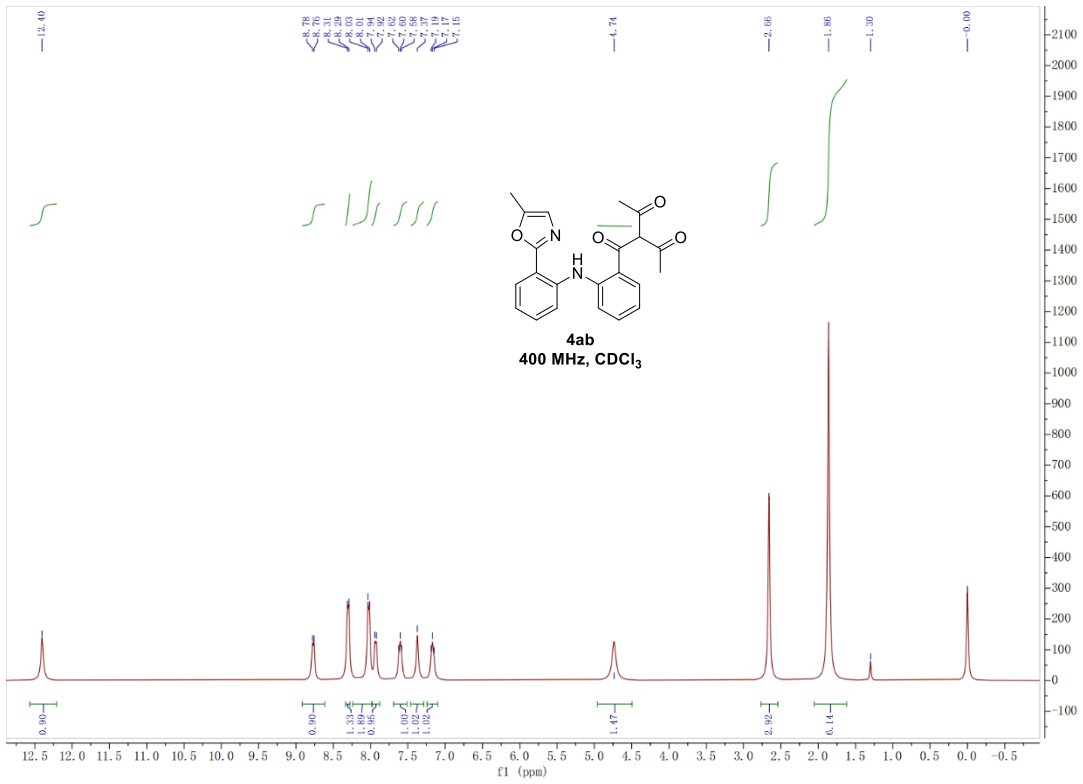

Supplement: d4ob00377b1.pdf [file d4ob00377b1.pdf]
